# Supplementary material for: Identification of a Novel Cuproptosis-Related Gene Signature for Prognostic Implication in Head and Neck Squamous Carcinomas
Source: Cancers (Basel). 2022 Aug 18;14(16):3986. doi: 10.3390/cancers14163986 (PMC9406337; doi:10.3390/cancers14163986)
Supplement: Supplementary file 1 [file cancers-14-03986-s001.zip]

Archive with 4 entries (4 files):
- legned of the Supplementary Figure S1.pdf
- Table S1. Cuproptosis-related genes.xlsx
- Table S2. Risk scores of all samples.xlsx
- Table S3. The gene sets of immune-related characteristics in TME.xlsx
