# Supplementary material for: Identification of a Novel Cuproptosis-Related Gene Signature for Prognostic Implication in Head and Neck Squamous Carcinomas
Source: Cancers (Basel). 2022 Aug 18;14(16):3986. doi: 10.3390/cancers14163986 (PMC9406337; doi:10.3390/cancers14163986)
Supplement: Supplementary file 1 [file cancers-14-03986-s001.zip › Table S1. Cuproptosis-related genes.xlsx]

## Sheet: index
table 1	Intersection of FDR less than 0.05 in Table 2 and Table 3
table 2	Whole genome CRISPR screen for the Elesclomol-Cu reported in previous literature
table 3	Whole genome CRISPR screen for the Cupric - DDC reported in previous literature.

## Sheet: Cuproptosis-related genes
gene
OXA1L
CDKN2A
TMEM191B
SOX2
AHR
TKT
LIPT1
DLAT
PDHB
LIAS
MBTPS1
MBTPS2
SCAP
FDX1
RPAP1
RPL3
UBAP2L
PDHA1
LDLR
CAPRIN1
ZFAT
IDH2
SAMM50
PITRM1
PGP
DLD
PRKDC
CERT1
TSC22D2
INTS6
TADA2A
MTF1
API5
C6orf136
GLS
CNN1
SLC16A1
ABCE1
MPC1
CLUH
MCUR1
AFG3L2
FZD8
MAU2
HAUS5
CEPT1
PCBP2
CIAO2A
REXO2
BRPF1
CCDC137
TPK1
EGLN1
RAD9A
COQ7
CHTOP
C1QBP
TRIM32
PRDM10
SLFN11
CENPJ
YEATS2
PFKP
TANK
RPUSD3
MRPL17
SGF29
COX11
NDUFS1
MRPL21
LARS2
MRPL41
POLG
MECR
QRSL1
MTG1
STARD7
FASTKD5
PDE12
TWNK
MRPL15
CLPP
MRPS25
CS
COX17
PDHX
CYCS
AASDHPPT
FAU
HARS2
SLC25A39
CDK1
LIPT2
GCLM
DNM1L
RPS27A
WARS2
MRPL36
C7orf26
MRPS33
RPL19
GFM1
NDUFA6
GCLC
SDHAF2
COX18
COX14
COA5
PTCD3
MRPS11
GATB
COX15
MRPL51
DHX15
ATL2
MFF
YARS2
UQCC2
NDUFA9
PPA2
NDUFB6
ELOB
MRPS7
SLC25A19
MRPS16
COX6B1
TARS2
COA6
EARS2
COPS5
CIAO1
RB1
GATC
GTPBP4
SARS2
NARS2
PARS2
UQCRC1
PRC1
NAPA
METTL17
TUBGCP4
MRPL53
CMPK1
FPGS
MARS2
NDUFAF6
MRM2
MRPS9
CENPW
ATPAF2
UBA2
MTO1
GPX4
PDZD4
CHCHD1
HSD17B10
RPL27
RRN3
TFAM
RPS25
MRPS14
IDH3A
UBE2I
RMND1
SHMT2
MRPL34
SLC25A51
HCCS
H2AC6
TRRAP
MRPS23
UQCR10
CSTF3
MRPL13
NDUFB10
TIMM9
MRRF
RPAIN
NDUFA8
CLPX
CYC1
RCC1L
COPZ1
MTERF1
IMP4
TUT1
COX7B
SSBP1
FARS2
NDUFS6
DBR1
MRPL2
MRPS30
RPUSD4
POT1
NDUFB9
POLR2K
SUPT16H
MRPS12
MRPS18A
GGPS1
SPATA5
NDUFB7
ATIC
N6AMT1
DDX20
DYNLRB1
RPLP0
MRPS2
WDR12
RUVBL2
CHMP4B
MRPL52
RSL1D1
SLC25A26
MRPL57
GNL3
COQ2
NDUFS2
TAF6L
ARMH3
PMVK
ALAS1
EXOC3
SLC25A32
MRPL12
MAN2C1
MRPS18B
DTYMK
NDUFV1
CDC16
KLF5
MRPL44
SRP54
ACD
PTPMT1
DARS1
NDUFB4
YAE1
DPH1
RPS19
GCSH
ATP5PD
CDC27
COX7C
ANKRD49
DYNC1LI2
TRAPPC11
MAD2L2
PET117
CCDC28B
MRPL16
MFN2
MRPL40
MCAT
COX4I1
MARCHF5
STK11
GADD45GIP1
NDUFB5
COPB2
NFYC
VPS45
MRPL30
MCMBP
GBF1
PSMD6
ZKSCAN5
NDUFA11
BUD31
KAT8
GTPBP6
NDUFA1
UQCRC2
HNRNPA2B1
NUBPL
EIF4G1
RPL28
PSMA6
DNTTIP2
TRAIP
NUP133
TOP1MT
IFT81
MCM5
PSMB5
KMT2A
PURG
HMBS
MRPS21
OSBPL9
NOP2
NRF1
CIT
VARS2
UQCC1
SNAPIN
GSS
MRPL14
CERS2
ZBTB11
USE1
SPDYE1
TAF4
HNRNPU
SLC7A5
RPL10A
NDUFS3
EPC2
MRPS22
POLR2B
GTF2B
ZNF365
PPIE
XRN1
MRPS18C
BRCA1
MTIF3
EIF3I
PHF5A
ACTR10
DOT1L
SURF6
U2SURP
LONP1
FOXM1
TEFM
ARHGEF39
UTP25
MDH2
MTBP
RPL7A
MRPL55
MRPS5
SYMPK
ENTPD3
NSF
ATP7B
PCGF6
FAM111A
TEDC1
ZNF341
PET100
NDUFB11
KIDINS220
DNAJC11

## Sheet: test_ElesclomolCu_Day14_DMSO_Da
gene	num	logfc	FDR
OXA1L	3	-1.7625	0.000573202
CDKN2A	4	-1.0521	0.000573202
TMEM191B	1	-0.99999	0.000573202
SOX2	4	-0.94481	0.000573202
AHR	4	-0.90798	0.000573202
TKT	4	-0.84353	0.000573202
LIPT1	4	0.71486	0.000573202
DLAT	4	0.76068	0.000573202
PDHB	4	0.76656	0.000573202
LIAS	4	1.1756	0.000573202
MBTPS1	4	1.331	0.000573202
MBTPS2	4	1.4814	0.000573202
SCAP	4	1.9493	0.000573202
FDX1	2	2.116	0.000573202
RPAP1	1	3.9344	0.000573202
RPL3	3	2.6016	0.00161213
UBAP2L	4	0.74202	0.00214943
PDHA1	3	0.77404	0.00214943
LDLR	4	0.84781	0.00214943
CAPRIN1	3	1.0719	0.00214943
ZFAT	4	0.59704	0.00273578
IDH2	4	1.0214	0.00273578
SAMM50	3	1.6615	0.00411209
PITRM1	4	-1.0269	0.00429898
PGP	4	-0.88063	0.00429898
DLD	3	1.2678	0.00429898
PRKDC	4	-0.68579	0.00504026
CERT1	4	0.54329	0.00504026
TSC22D2	4	1.0975	0.00504026
INTS6	4	0.951	0.00659179
TADA2A	4	0.83577	0.00693384
MTF1	4	-1.1664	0.00703478
API5	4	0.50207	0.00703478
C6orf136	3	-1.3452	0.00733362
GLS	3	-0.33613	0.00810669
CNN1	4	0.64717	0.0126581
SLC16A1	4	-1.0153	0.0156118
ABCE1	4	1.2552	0.0156118
MPC1	4	0.69477	0.0156529
CLUH	3	-1.0277	0.0156911
MCUR1	4	-1.7683	0.018629
AFG3L2	4	1.2026	0.018629
FZD8	4	-0.69895	0.0216903
MAU2	4	0.88801	0.0216903
HAUS5	4	1.1014	0.0223552
CEPT1	4	0.54589	0.0244853
PCBP2	4	-0.95693	0.0266895
CIAO2A	4	-0.69744	0.0266895
REXO2	4	-0.58313	0.0396463
BRPF1	4	0.33443	0.0396463
CCDC137	4	0.62153	0.0396463
TPK1	4	0.66268	0.0396463
EGLN1	3	0.85858	0.0396463
RAD9A	4	1.5185	0.0396463
COQ7	4	-0.78976	0.0397657
CHTOP	4	0.69502	0.0397657
C1QBP	4	-0.7928	0.0403669
TRIM32	4	-0.52005	0.0403669
PRDM10	4	0.7656	0.0403669
SLFN11	4	0.10482	0.0408407
CENPJ	4	0.86569	0.0441179
YEATS2	4	0.77954	0.044793
PFKP	3	-0.86557	0.0476919
TANK	4	0.53313	0.0476919
MCRIP2	4	-0.97756	0.0572771
E4F1	3	1.1688	0.059274
ADRM1	4	0.58563	0.061682
PI4KB	4	0.70133	0.061682
POP4	3	1.0475	0.061682
AASDHPPT	4	1.059	0.0617818
ECH1	4	0.46563	0.0659992
CS	4	0.59671	0.0707599
UBR4	4	0.62408	0.0707599
USF2	3	0.83335	0.0707599
URI1	4	0.82333	0.0711919
GDI2	3	0.95483	0.0720664
GGPS1	3	1.3047	0.0724702
STT3A	4	0.53177	0.0750666
SF3B1	4	0.88476	0.0837215
RPS11	3	1.0618	0.0837215
DCAF13	4	1.1315	0.0839615
SPTLC1	4	0.89484	0.0886007
MPI	3	0.61274	0.0896073
RPL27	3	0.43016	0.0936582
RPS16	4	0.7894	0.0952792
NAA20	4	1.0499	0.0952792
SGF29	4	0.48015	0.0961226
ERRFI1	4	0.61167	0.0961226
CDK1	4	1.084	0.0961226
DDIT4	4	0.56049	0.100023
ANKRD28	2	-1.1637	0.10458
BHLHE41	4	0.48832	0.10458
TIMM8A	4	-0.75789	0.105856
IDH3A	4	0.94369	0.106561
RPE	4	-1.1076	0.114232
SLC47A1	2	-1.0182	0.114232
FECH	4	-0.80399	0.114232
BTRC	4	0.57115	0.114232
ATXN1L	4	0.61773	0.114232
SLC7A5	4	0.65854	0.114232
TNRC18	4	0.66013	0.114232
NSMCE3	3	0.71919	0.114232
MARCHF5	4	0.74952	0.114232
SEC62	3	0.77066	0.114232
SPTSSA	4	1.0232	0.114232
H3C11	4	0.63432	0.114666
VPS51	4	0.78343	0.114666
ATAD3A	3	-0.93739	0.11556
TIMELESS	3	1.2011	0.11556
SSTR2	3	-0.59225	0.116855
COG6	4	0.50497	0.11828
ARID1B	4	0.24305	0.12437
TGFBRAP1	4	0.70993	0.12437
CIAPIN1	3	1.1154	0.12437
KAT8	3	0.066395	0.131084
ZNF418	4	0.45109	0.131084
SELENOV	4	0.64597	0.131084
YPEL5	4	0.81155	0.131084
DCAF11	3	-0.56097	0.133015
GPT	2	-1.1444	0.137352
ATP8B3	4	0.84585	0.139345
HLA-DMA	4	-0.7812	0.140598
SYNE4	4	0.36064	0.144156
CCDC59	3	1.1632	0.144156
KNTC1	4	0.45264	0.146566
PMVK	3	0.60928	0.146566
ZNF564	4	0.64608	0.146566
ACSL3	4	0.69742	0.146566
WASHC5	2	0.94733	0.146566
SLC35E1	3	0.96917	0.151919
PITPNM1	4	0.61036	0.152337
ANKRD52	3	-0.71242	0.152615
WDR18	4	0.99121	0.155476
ABHD17B	4	-0.58363	0.156367
PHF6	4	0.50737	0.160305
ARHGEF10L	4	-0.32054	0.160851
RPL37	3	0.23856	0.160851
SPATA2	3	0.61734	0.163858
VPS52	4	0.78073	0.163858
C18orf65	4	-0.52176	0.165002
SLC6A13	4	0.5542	0.165002
DBR1	3	0.56861	0.165002
UPK2	4	0.57566	0.165002
MAGEB2	3	0.62316	0.165002
UTP20	4	0.65824	0.165002
GGN	4	0.69236	0.165002
PRC1	4	0.71262	0.165002
MRPL52	3	0.72016	0.165002
JTB	4	0.75294	0.165002
HMGCS1	4	0.88167	0.165002
GADD45GIP1	4	1.0077	0.165002
KDSR	4	1.0395	0.165002
PHAX	4	0.14515	0.167023
FOXA2	4	0.3891	0.167023
CUL3	4	0.81511	0.167023
GPR1	4	-0.45053	0.167937
BRIP1	4	0.50836	0.170044
TLCD4	1	1.329	0.173104
POU2AF1	4	0.51665	0.173204
AMFR	4	0.52284	0.173402
EIF3I	4	0.55212	0.173402
EI24	4	0.91411	0.178382
NBN	4	0.6244	0.179982
C19orf57	2	0.84656	0.179982
STK11	4	0.86131	0.181183
COQ10B	3	-0.93606	0.181231
ERI3	4	-0.43008	0.181897
GMPPB	4	0.80671	0.184807
QARS1	4	1.3841	0.186308
DYNC1LI2	4	0.62181	0.186391
RAB5B	4	0.67134	0.186391
POLA1	2	1.1085	0.188601
RAP2A	4	0.41005	0.190502
ANKRD9	4	0.48638	0.196636
USP14	4	0.49393	0.196636
NEK8	4	0.59434	0.196636
SRP72	4	0.50997	0.198918
PAK4	4	0.74742	0.203883
P2RY4	3	-0.67899	0.207169
ADCYAP1R1	3	-0.62906	0.207511
SAMD8	4	0.33759	0.207511
NRIP1	4	0.46424	0.207511
CAND1	4	0.69459	0.207511
NDUFA7	4	0.74789	0.207511
YKT6	4	0.76655	0.207511
SRP54	4	0.8072	0.207511
GALNS	4	0.50911	0.209424
PCDH12	4	0.62159	0.210145
GART	4	0.69035	0.212041
ABCB7	4	-1.3695	0.21329
TOX3	4	-0.55572	0.21329
G6PD	3	-0.4558	0.21329
MIP	4	-0.44175	0.21329
GABPB1	4	-0.38035	0.21329
VPS39	4	0.38998	0.21329
SAMD11	4	0.49337	0.21329
RUSC1-AS1	4	0.50183	0.21329
C19orf67	3	0.55034	0.21329
NOB1	4	0.56901	0.21329
LIG1	4	0.61896	0.21329
RFWD3	3	0.67446	0.21329
NAPA	2	0.86881	0.21329
SMC5	3	0.88242	0.21329
CDC40	3	0.91469	0.21329
RBM33	3	0.99721	0.21329
CTU1	3	1.0675	0.21329
PSMA4	3	1.2778	0.21329
GCLM	4	0.53227	0.216319
MAP3K6	2	-0.82962	0.217988
KDM4A	3	-0.77495	0.219825
UFL1	4	-1.0352	0.220811
CTCFL	4	-0.51428	0.221879
ATL2	2	1.4541	0.224796
NUDT10	3	-0.44141	0.226163
DDX39A	4	0.45486	0.227428
HMGCLL1	3	-0.56462	0.227864
MAGEA8	4	-0.56355	0.227864
WNT6	4	0.32905	0.23243
EIF3L	4	-0.89612	0.233322
AIP	4	-0.46071	0.23351
CIZ1	3	-0.61496	0.233624
LRRTM4	3	-0.63975	0.237061
SUV39H1	3	-0.67225	0.240237
DLK2	3	-0.34482	0.260657
TMEM234	1	1.1762	0.260657
PABPC1L	3	-0.93681	0.263439
RPS25	2	1.5034	0.263439
FGF12	2	-0.57198	0.263783
EOGT	3	0.63934	0.264207
CARS1	3	0.51851	0.267947
PAK2	3	1.5222	0.267947
BUB1	2	1.2077	0.268059
DCAF12L1	4	-0.4832	0.274804
HSP90B1	3	0.65096	0.275472
WDR63	3	0.51915	0.276637
SFMBT1	3	-0.43602	0.28176
CATSPERB	4	0.55874	0.28176
PDHX	3	0.58984	0.28176
RFC2	4	0.63805	0.28176
DAZAP2	3	0.70197	0.28176
DOP1B	4	-0.45708	0.282022
TELO2	4	0.59416	0.284366
PANK4	2	0.78587	0.284366
YTHDC1	4	0.82494	0.285256
NOL4L	3	-0.58281	0.289162
OPTN	4	-0.16545	0.289162
HNRNPU	3	1.352	0.289162
NHP2	4	0.5614	0.292993
MMUT	3	-0.57754	0.295061
ABHD2	3	-0.47484	0.296704
PTPMT1	4	0.4156	0.297137
SACM1L	4	0.59499	0.297137
ZNF638	3	-0.86494	0.29716
MTA2	4	0.45167	0.29716
UBE2G2	4	0.46681	0.29716
TET2	4	0.49555	0.29716
CCDC84	4	0.58699	0.29716
GSTO1	4	0.63568	0.29716
CRKL	4	0.46983	0.297724
KIN	4	0.76901	0.297724
TSPAN19	4	-0.51305	0.298427
ICA1L	4	0.37674	0.298427
ORC3	4	0.81129	0.298427
GINS2	4	1.0368	0.298427
ARL15	4	-0.72114	0.303184
CRTAP	4	0.31858	0.303184
SNF8	4	0.56792	0.303184
ADD2	4	-0.46974	0.303339
PSMC2	4	0.88237	0.307127
FAM181B	2	0.93414	0.309113
S100A3	2	0.33965	0.310954
WDR25	3	0.85026	0.313486
ADO	4	-0.96409	0.316128
CCNB1	3	0.060877	0.316128
ZNF571	3	0.85467	0.316128
PGD	4	-0.92848	0.316221
ACACA	4	-1.0493	0.321143
KCNQ5	3	-0.4582	0.321143
COMMD2	3	0.85466	0.321143
ACOT13	4	-0.85758	0.331357
MAPK6	3	-0.57942	0.331357
ZNF396	4	-0.41465	0.331357
CTCF	3	0.84825	0.331357
COP1	3	1.0444	0.331357
CELF6	3	-0.74519	0.333634
DDX51	4	0.45186	0.336156
LRRC56	3	0.49616	0.336156
BANP	3	0.77797	0.336156
RFC3	4	1.1914	0.336156
SLC26A6	3	-1.0096	0.336344
CYB5B	3	-0.85537	0.336344
WDR13	4	-0.59741	0.336344
HIRA	4	-0.5844	0.336344
TRPC4	4	-0.50491	0.336344
NHSL2	4	-0.49621	0.336344
NDUFB7	4	0.42223	0.336344
TMEM182	3	0.42339	0.336344
ADPRHL1	3	0.47625	0.336344
TSEN34	3	0.48238	0.336344
GTF3C4	4	0.48332	0.336344
TADA3	4	0.50457	0.336344
CRLF1	4	0.53752	0.336344
GJC1	4	0.55307	0.336344
BLM	3	0.57788	0.336344
KMT2A	2	0.6101	0.336344
FUBP1	4	0.61568	0.336344
SLCO4A1	4	0.62544	0.336344
TSPAN18	4	0.64448	0.336344
ACTR6	4	0.65527	0.336344
POLR1E	4	0.72104	0.336344
RBSN	3	0.86052	0.336344
STEAP3	2	0.86586	0.336344
ANAPC2	3	0.87415	0.336344
SYMPK	2	0.8888	0.336344
KLF5	4	0.88895	0.336344
PSMD14	4	0.91298	0.336344
RPS2	3	0.91941	0.336344
ACTR10	2	1.0142	0.336344
C1orf109	3	1.0441	0.336344
AGAP11	1	1.2157	0.336344
CENPA	2	1.348	0.336344
PCBP4	3	0.50349	0.339739
PEX14	4	0.52241	0.339739
LAMTOR2	4	0.60235	0.340337
CAMK2D	3	-0.68099	0.344321
HPCAL4	4	-0.60507	0.344891
NXPE2	3	0.32296	0.344891
GINS1	3	0.46441	0.344891
SHKBP1	4	0.27042	0.345509
CMPK1	4	0.30511	0.345509
CYB561D2	4	0.63443	0.345509
RB1	3	-0.36335	0.346739
EXOC7	4	0.59088	0.349889
RLIM	4	-0.39424	0.351032
BIRC2	4	0.50212	0.351032
REEP1	3	-0.3151	0.351109
COMMD6	3	-0.66553	0.351437
FBXO36	4	-0.62425	0.351437
TMPRSS2	2	-0.50146	0.351437
PCIF1	4	-0.48537	0.351437
ATP6V1FNB	4	-0.42661	0.351437
OR13D1	4	-0.3639	0.351437
CLDN5	3	0.17454	0.351437
ADAT3	3	0.38685	0.351437
CENPK	4	0.42212	0.351437
IP6K2	4	0.52755	0.351437
XRCC2	3	0.54881	0.351437
SMIM1	2	0.71913	0.351437
YARS1	4	0.75755	0.351437
MCAT	4	-0.37344	0.352048
TECTA	3	0.57722	0.354793
CCDC18	3	0.73253	0.354793
URB1	3	0.64479	0.359217
OR2A42	1	-0.55279	0.36163
CRK	3	-0.9253	0.365681
SUMF2	3	-0.58717	0.365681
PON3	3	-0.12085	0.366106
TP53	4	-0.73312	0.368274
WTAP	3	-0.034936	0.368274
LIG3	2	-0.35593	0.373515
FBXO42	3	0.80279	0.37486
RRAGD	2	-0.70719	0.376013
IGF2BP1	4	-0.6569	0.377203
ATRNL1	4	-0.45731	0.379185
PNN	4	0.69604	0.379467
SNRPD1	2	1.0201	0.380446
LKAAEAR1	4	-0.45285	0.381846
COX5A	4	-0.63878	0.382119
POR	4	-0.51829	0.385945
SCYL2	4	-0.31813	0.385945
TBCC	4	0.44812	0.385945
CSTF3	4	0.53797	0.385945
BRCA1	4	0.79227	0.385945
MPC2	1	0.93357	0.387534
GIPC1	2	-1.0167	0.389737
NDC1	4	-0.075257	0.389737
ASPG	4	0.45976	0.389737
TFE3	3	-0.97043	0.390992
DAB2IP	4	-0.61972	0.390992
MAGOHB	2	-0.60132	0.390992
PRSS8	4	-0.578	0.390992
ABCC1	4	-0.57091	0.390992
GZMM	4	-0.53741	0.390992
GAPVD1	4	-0.46866	0.390992
ATP7B	4	-0.44413	0.390992
ACRBP	3	-0.43538	0.390992
ELP3	4	-0.40538	0.390992
HDAC5	4	-0.35356	0.390992
MYO9B	4	0.32533	0.390992
RAB3GAP2	4	0.48822	0.390992
MAML2	4	0.52709	0.390992
PLCD3	3	0.68956	0.390992
SAMD9	3	0.6978	0.390992
PRKAG3	4	0.76426	0.390992
IMP4	4	0.79234	0.390992
ATP6V1A	4	0.84161	0.390992
FIP1L1	4	0.86404	0.390992
FANCM	3	0.95572	0.390992
INO80C	4	0.31499	0.391272
TSC2	4	0.45098	0.391272
SYF2	3	-0.12578	0.391319
MARK2	4	0.060907	0.391319
NDUFB9	4	0.34815	0.391319
MIR205HG	2	0.5639	0.391319
OCRL	3	0.65471	0.391319
GFPT1	4	0.97204	0.391319
RPL10	2	1.0998	0.391319
ELP4	3	1.1029	0.391319
COPZ1	3	0.3779	0.391429
P4HA3	3	0.47498	0.391429
CERS1	4	0.49939	0.391429
VKORC1L1	4	0.58024	0.391429
MRTO4	4	0.6924	0.391429
CIAO1	4	0.89068	0.391429
SUPT6H	2	1.006	0.391429
TMEM185B	3	-0.35782	0.393182
FERMT2	4	0.63908	0.393182
RANGAP1	4	1.0869	0.394748
NOL6	4	0.70114	0.395406
POLR1C	3	0.78809	0.398069
ZNF574	4	0.52302	0.398876
PWWP3B	4	0.42435	0.399929
NR2C2AP	3	0.78318	0.400531
ATP5F1B	3	-0.77892	0.401816
GABARAP	2	-0.73316	0.402329
COL12A1	3	-0.37219	0.402839
MTMR9	4	0.38376	0.403206
RINL	4	0.51241	0.403206
SCAF11	4	0.71266	0.403206
ZNRD1	4	0.87885	0.403206
SRSF7	4	0.84453	0.405227
CRYBG3	4	0.41136	0.409501
ALDH1A3	1	-0.89482	0.420677
MAPK4	4	-0.71783	0.420677
YWHAZ	1	-0.69303	0.420677
NME3	4	-0.66186	0.420677
DEK	4	-0.58804	0.420677
CPXM2	4	-0.41912	0.420677
SAR1A	4	0.33014	0.420677
ECSIT	3	0.39373	0.420677
CTPS1	4	0.40426	0.420677
OAZ1	3	0.40743	0.420677
WDR26	4	0.42996	0.420677
GSK3B	4	0.45453	0.420677
SLC41A3	4	0.49876	0.420677
CEP295	4	0.508	0.420677
ADGRA2	3	0.53449	0.420677
DDX20	4	0.57093	0.420677
DDX41	4	0.6261	0.420677
PGGT1B	4	0.65448	0.420677
DERL1	3	0.7421	0.420677
ZNF526	4	0.80637	0.420677
SNRNP200	4	-0.94878	0.421003
GIT1	3	-0.83859	0.421003
ABCB6	4	-0.69221	0.421003
ZC3H12B	4	-0.62243	0.421003
SMIM22	4	-0.5867	0.421003
MED23	4	-0.53158	0.421003
PHKG1	3	-0.53035	0.421003
FUT9	3	-0.48302	0.421003
ARHGEF28	4	-0.46689	0.421003
IL12RB2	3	-0.44468	0.421003
CPPED1	4	-0.43879	0.421003
PLOD2	4	-0.42265	0.421003
NR5A2	4	-0.40106	0.421003
PKD2L1	4	-0.39956	0.421003
MZF1	3	-0.388	0.421003
ZNF292	4	-0.37101	0.421003
KIAA0556	4	-0.35755	0.421003
FMR1NB	4	-0.33037	0.421003
GHR	4	-0.31581	0.421003
FLT4	4	-0.29299	0.421003
SMARCD1	4	-0.27609	0.421003
PLAA	3	-0.12144	0.421003
LY86	4	-0.092907	0.421003
RET	4	0.17766	0.421003
NUDT8	4	0.24241	0.421003
CCND1	4	0.27048	0.421003
ZNF628	4	0.31604	0.421003
VPS11	4	0.32208	0.421003
ACD	4	0.33046	0.421003
HSBP1	4	0.33332	0.421003
GRAMD1A	3	0.3503	0.421003
TLE6	4	0.36235	0.421003
ZNF793	4	0.37751	0.421003
CMTM4	4	0.3913	0.421003
KEAP1	4	0.41779	0.421003
NIBAN3	4	0.46554	0.421003
RXFP3	3	0.47669	0.421003
KANSL3	4	0.49577	0.421003
FADD	4	0.52137	0.421003
RFXAP	4	0.52262	0.421003
NUFIP1	4	0.53637	0.421003
NRBP1	4	0.56228	0.421003
THOC2	4	0.56675	0.421003
CTDSPL2	4	0.60213	0.421003
IGFLR1	3	0.62191	0.421003
CHMP1B	2	0.64523	0.421003
TBP	3	0.64581	0.421003
METTL14	4	0.65958	0.421003
ANXA8	2	0.70482	0.421003
ILK	3	0.71648	0.421003
ACO2	3	0.72324	0.421003
FLCN	2	0.72512	0.421003
UTP25	3	0.76675	0.421003
SPATA5	4	0.80608	0.421003
NDUFB1	1	0.81971	0.421003
PLEKHG6	3	0.84151	0.421003
EIF4G1	4	0.85048	0.421003
SRSF3	3	0.87914	0.421003
SLC6A11	1	0.88977	0.421003
MAK16	4	0.92666	0.421003
KATNB1	2	1.1222	0.421003
CCAR2	3	-0.6228	0.421268
LIN7C	4	-0.51609	0.421268
COQ6	4	-0.49811	0.421268
FAM234A	4	-0.38959	0.421268
GUCD1	4	0.28397	0.421268
CNFN	4	0.30766	0.421268
MAG	4	0.42286	0.421268
ARMH3	4	0.60751	0.421268
NADSYN1	3	0.67929	0.421268
SUGP1	2	0.69337	0.421268
TERF2	4	0.69435	0.421268
ZNF596	3	0.71224	0.421268
RFXANK	3	0.75418	0.421268
CEMIP2	3	0.78656	0.421268
VPS29	3	0.87563	0.421268
NSMCE4A	4	1.0379	0.421268
DLX5	3	0.35032	0.423891
SMARCD3	2	0.57221	0.423891
FAM111A	3	-1.0514	0.427975
TBL1XR1	3	-0.76738	0.427975
RBM27	3	-0.75181	0.427975
PFKFB3	3	-0.70005	0.427975
TSPAN14	3	-0.67456	0.427975
ACTN1	3	-0.63677	0.427975
SCARB2	4	-0.54331	0.427975
CHUK	4	-0.53035	0.427975
PCBD1	4	-0.51457	0.427975
ENPP2	3	0.122	0.427975
SETD1B	4	0.24272	0.427975
CTSK	4	0.27921	0.427975
C11orf71	4	0.35226	0.427975
DNM2	4	0.35239	0.427975
MON2	4	0.35685	0.427975
UBA2	4	0.41204	0.427975
RAD23A	4	0.44749	0.427975
SLMAP	4	0.49052	0.427975
MAP3K10	3	0.52809	0.427975
YLPM1	4	0.54789	0.427975
DENR	4	0.55276	0.427975
BAG5	3	0.58861	0.427975
CTDNEP1	4	0.61418	0.427975
STC2	3	0.61977	0.427975
TIMM22	4	0.70764	0.427975
S100A5	3	0.7591	0.427975
TBCE	4	0.84522	0.427975
COQ2	4	-0.4663	0.428255
C10orf95	3	-0.69714	0.428356
OTOGL	4	-0.35558	0.428356
RRM1	2	0.26443	0.428356
AUP1	3	0.58077	0.429521
ZNF563	3	0.58382	0.429521
TIMM10	4	0.62255	0.429521
PSMB6	3	1.1862	0.429521
KPTN	2	-0.92151	0.430854
GUCY1B1	4	-0.20129	0.430854
PMAIP1	3	-0.52834	0.430883
TRIM52	3	0.50153	0.430883
PHOSPHO2	2	-0.67854	0.43109
TRIR	4	0.46963	0.432646
NDUFA11	3	0.71618	0.432646
VPS33A	4	0.31554	0.434501
KCNJ13	4	-0.37038	0.434695
DDX21	3	0.78629	0.434695
SLC20A1	4	-0.44769	0.434826
OR4C15	4	0.24229	0.434826
DEFB1	2	-0.73804	0.436645
NUDT3	2	-0.47327	0.436645
STPG2	4	-0.16803	0.436645
PSMG2	3	0.21777	0.436645
RABIF	4	0.28869	0.436645
RAB43	3	0.30847	0.436645
PNMA1	4	0.31015	0.436645
ZNF791	4	0.35963	0.436645
YIPF2	4	0.42595	0.436645
AKIP1	3	0.43255	0.436645
SLC1A5	4	0.43634	0.436645
LCTL	3	0.46387	0.436645
FAF2	4	0.47879	0.436645
CIC	4	0.48437	0.436645
TPBGL	4	0.50518	0.436645
MED18	4	0.53122	0.436645
COG5	4	0.68614	0.436645
TMEM30A	4	0.70016	0.436645
CYP2S1	3	0.70271	0.436645
ELOF1	4	0.72959	0.436645
TRAPPC2L	4	0.74113	0.436645
RBM28	3	0.75376	0.436645
EIF4G2	2	0.75713	0.436645
LAMTOR3	3	0.91344	0.436645
RAD50	3	1.0919	0.436645
FBXW10	4	0.32168	0.438527
NOC3L	3	0.74789	0.438527
CTAGE6	1	0.94041	0.439026
PFDN6	4	0.18564	0.439687
MIS18A	3	0.2725	0.440964
BACH1	4	0.53746	0.440964
NR1I3	3	0.53904	0.440964
TRIM4	4	0.36883	0.442015
BCAP31	3	0.53232	0.442336
SWSAP1	4	0.39387	0.442735
MAST1	4	0.53445	0.444182
KDM1A	4	0.59557	0.444182
FAU	4	0.60979	0.444182
CEACAM21	4	0.45016	0.444274
MB	3	0.61974	0.444274
MAN1A1	1	-1.5887	0.444946
SLC25A28	3	-0.90226	0.444946
STOM	4	-0.61379	0.444946
DYNLL2	4	-0.58442	0.444946
RELA	4	-0.55751	0.444946
INSC	3	-0.5302	0.444946
COA4	2	-0.49172	0.444946
COA1	4	-0.4787	0.444946
ATPAF2	4	-0.46996	0.444946
SUMO3	4	-0.46957	0.444946
ANTXR1	3	-0.45285	0.444946
SIN3B	4	-0.42821	0.444946
AGT	4	-0.39245	0.444946
FAT2	4	-0.36012	0.444946
ZCCHC8	4	-0.31284	0.444946
SAP30L	4	-0.2613	0.444946
PLS3	4	-0.25901	0.444946
KIAA1324	3	-0.24945	0.444946
C6orf99	4	-0.21251	0.444946
THOC6	4	0.038429	0.444946
PHLPP2	4	0.28504	0.444946
SLC25A39	4	0.37365	0.444946
ATP6V1G3	4	0.38282	0.444946
RPP14	4	0.41192	0.444946
SNRPB	4	0.4467	0.444946
DOT1L	4	0.47007	0.444946
XRCC4	4	0.5236	0.444946
NUP85	4	0.53442	0.444946
HTATIP2	3	0.53595	0.444946
EXOC8	3	0.55002	0.444946
PLRG1	4	0.5617	0.444946
NOP10	4	0.58787	0.444946
QRICH1	4	0.59161	0.444946
FPGS	3	0.61796	0.444946
NDUFB6	4	0.62536	0.444946
SPDL1	4	0.66145	0.444946
FAM86C1	1	0.67066	0.444946
S100A1	3	0.73083	0.444946
CDH1	3	0.8556	0.444946
ADSL	4	0.95124	0.444946
SRFBP1	3	0.95265	0.444946
PAFAH1B3	3	0.46843	0.445914
RAB18	4	0.64387	0.445914
CARD8	3	0.29124	0.447499
RBM47	4	-0.53752	0.449511
THBS2	4	-0.36506	0.449511
PSMG4	3	0.49968	0.449511
ATAD3C	3	0.85303	0.449511
GPBP1	2	-0.97981	0.449678
HSDL2	2	0.62411	0.449678
KRTAP1-3	1	0.99342	0.449678
SNRPA1	1	1.6747	0.449678
IMMT	3	0.24747	0.452182
SMIM12	4	-0.62728	0.453222
SAMD5	3	0.42705	0.453222
MCM3	3	0.49756	0.453222
PAIP2	2	0.6563	0.453222
GRM4	3	-0.45288	0.454639
PDLIM2	4	-0.31551	0.454884
PTK7	4	0.30282	0.454884
MAATS1	4	0.5089	0.454884
HEATR3	4	0.4646	0.455023
PRKCB	3	-0.47709	0.455292
NYAP1	4	0.42612	0.459743
KIF6	2	-0.58692	0.459814
GSDMD	4	0.4086	0.459814
ASB7	4	0.55806	0.459814
ELP5	4	0.52134	0.461323
CD101	3	-0.78124	0.462872
FOXF1	1	-0.68606	0.462872
LYPD8	3	-0.49878	0.462872
PRSS42P	3	-0.43813	0.462872
CELF1	3	0.043548	0.462872
DAZAP1	3	0.046277	0.462872
H2AC1	4	0.2515	0.462872
NCAM1	4	0.40875	0.462872
ZNF837	4	0.6339	0.462872
SAC3D1	3	0.69843	0.462872
OTUB2	4	-0.57184	0.463524
ASNSD1	4	-0.29263	0.463524
CDC37L1	3	-0.066246	0.463524
RACK1	4	0.07408	0.463524
COLGALT1	3	0.13678	0.463524
EMD	4	0.16204	0.463524
ZNF558	4	0.32365	0.463524
LYG2	4	0.33037	0.463524
PDE7A	3	0.34325	0.463524
ZCCHC10	3	0.34838	0.463524
DLST	4	0.41201	0.463524
USF1	4	0.44344	0.463524
TPPP3	4	0.44853	0.463524
CIT	4	0.45428	0.463524
G3BP1	4	0.53202	0.463524
FAM71A	4	0.59558	0.463524
TRMT10A	4	0.61273	0.463524
NHLRC2	4	0.62486	0.463524
NAA40	3	0.62647	0.463524
MFF	4	0.69589	0.463524
ACHE	3	0.89408	0.463524
DDX54	4	0.52937	0.465922
INTS1	3	1.0065	0.465922
BARX2	4	0.19943	0.467049
CHRFAM7A	2	0.43107	0.468645
IKZF4	4	0.52736	0.468645
CLNS1A	4	0.63157	0.468645
CAMK2B	3	-0.40568	0.471602
KMT2B	4	0.34196	0.471602
INSIG2	4	0.38565	0.471602
TYW3	4	0.55454	0.471602
PCDHA2	4	0.27344	0.472095
TEX30	2	-0.70685	0.47413
NUTM2G	2	-0.49404	0.47413
PUS7L	3	-0.48741	0.47413
SPATA31C1	3	-0.45718	0.47413
PALD1	4	-0.41773	0.47413
RAB40C	4	-0.40188	0.47413
SDSL	3	-0.37346	0.47413
SLC22A2	4	-0.32459	0.47413
KDM4C	4	-0.23761	0.47413
CD163	4	0.010051	0.47413
KLF6	4	0.15936	0.47413
ABR	4	0.20071	0.47413
SLC25A41	3	0.33905	0.47413
CWC25	4	0.35346	0.47413
ASPRV1	4	0.40742	0.47413
ATP10D	4	0.42375	0.47413
HSD17B13	4	0.49201	0.47413
GTF3A	3	0.58363	0.47413
RTBDN	3	0.60456	0.47413
XRCC5	4	0.67431	0.47413
H3-3B	3	0.76152	0.47413
HDAC3	4	0.80212	0.47413
UGT1A10	4	0.53426	0.476476
CENPQ	4	-0.39991	0.477209
LYPD1	4	-0.14116	0.477209
SLC34A1	3	0.63679	0.477209
ABCG5	2	0.67559	0.477209
GTSF1	3	0.38872	0.477253
NPAP1L	4	0.50546	0.477382
SERPINC1	2	0.60516	0.47789
TTI1	4	0.61978	0.478902
TUBG1	4	0.65716	0.479112
CHFR	4	-0.52198	0.479238
SERAC1	4	-0.47572	0.479238
WDR70	3	-0.096669	0.479779
KRT5	3	0.36455	0.479779
C19orf38	4	0.49872	0.479779
CLASP1	4	0.49996	0.479779
DNAJA2	3	0.2868	0.480028
PITHD1	4	-0.31147	0.480064
RBIS	4	-0.30438	0.480064
LGALS12	4	-0.17541	0.480064
VRK1	4	0.40059	0.480064
PDCD2L	4	0.25491	0.480306
RBP2	3	0.47076	0.480306
LRTOMT	3	0.61554	0.480306
MZT1	2	0.84453	0.480306
RPF1	4	0.46752	0.480344
CWC15	4	0.47699	0.480344
TAF5	4	-0.95927	0.480968
ME2	4	-0.47471	0.480968
DNALI1	4	-0.33834	0.480968
SLC28A1	4	0.015145	0.480968
KIAA1257	4	0.24489	0.480968
SLC22A20P	4	0.24983	0.480968
MAP7D1	4	0.2551	0.480968
CAMSAP1	4	0.31779	0.480968
NXF1	4	0.32224	0.480968
SGO2	4	0.39721	0.480968
VWF	4	0.39865	0.480968
RPL13	3	0.55956	0.480968
GPR63	3	0.56628	0.480968
SF3A1	3	0.65028	0.480968
FAM166A	4	0.33303	0.481933
RAB2A	3	0.61807	0.48205
OSTF1	4	-0.38156	0.482163
TRPC4AP	4	0.14152	0.482163
MYO7B	4	0.32718	0.482797
MRPL2	4	0.55052	0.482797
HSD17B14	4	0.3583	0.483152
CCL3	4	-0.43139	0.484253
DNAJB5	4	0.096161	0.484253
PRKAB1	4	0.45034	0.484253
SRSF5	4	-0.39425	0.485942
FAM160B2	3	0.48504	0.485942
NOL10	4	0.85521	0.485942
B3GNT2	3	-0.77038	0.487568
ACSL6	4	-0.36789	0.487568
UNC5CL	4	-0.33012	0.487568
GEMIN4	4	-0.046287	0.487568
RPL28	4	0.8951	0.489334
NECTIN2	4	0.14137	0.489953
MUSK	2	-0.41591	0.493129
FIBP	2	-0.26559	0.493308
HNRNPL	4	-0.21477	0.493369
PDLIM4	1	-0.54159	0.493391
FAAH	2	-0.81082	0.495215
CNTLN	3	-0.52465	0.495682
STX1B	3	-0.43292	0.495682
ABCB10	4	-0.36864	0.495682
KRR1	4	0.57167	0.495682
TMPO	4	0.09655	0.495914
WDR82	3	0.57592	0.495914
TMEM14C	3	-0.66089	0.496279
CNOT4	4	0.16505	0.496279
CHD9	4	0.31242	0.496279
BTK	4	0.48014	0.496603
ITPK1	4	0.50416	0.496603
ZBTB10	4	0.6436	0.496603
LUC7L2	1	-0.9004	0.500248
REXO1	4	-0.27497	0.500248
SNX30	4	-0.20852	0.500248
ACP7	4	0.15723	0.500248
PAFAH1B1	4	0.27861	0.500248
PAGR1	4	0.29165	0.500248
EPG5	4	0.30204	0.500248
NUP155	4	0.30526	0.500248
PLEK2	4	0.33688	0.500248
NXT1	4	0.42061	0.500248
TBCCD1	4	0.42565	0.500248
NAA10	4	0.66873	0.500248
ACTR1A	4	0.79403	0.500248
FBL	4	0.81419	0.500248
PSMB4	4	0.98139	0.500248
UBE2I	4	1.0122	0.500248
COG3	4	-0.0045066	0.501193
DRC7	4	0.089356	0.501193
RBCK1	4	0.21451	0.501193
DCAF15	3	0.56173	0.501506
DYNLRB1	4	-0.14496	0.502376
LOC101927572	4	0.34118	0.502376
DCAF12	4	0.40091	0.502376
ARHGEF4	3	0.54868	0.502376
GPI	2	-1.7587	0.503931
POSTN	3	0.79352	0.503931
EFNA2	3	0.45145	0.504725
FADS2	3	-0.62759	0.506055
CCR7	4	-0.58516	0.506055
XPNPEP1	3	-0.56052	0.506055
CDKN1C	4	-0.51417	0.506055
ZNF460	4	-0.36953	0.506055
SLC1A7	4	-0.024543	0.506055
LRRC4B	4	0.38545	0.506055
AASDH	4	0.49909	0.506055
PAPOLA	4	0.50779	0.506055
BNIP2	2	0.81535	0.506055
SPEM1	4	-0.39063	0.507353
ATP5F1C	4	-0.6682	0.508325
ZRANB1	4	-0.48533	0.508325
TNS3	4	-0.37919	0.508325
CLEC16A	4	0.23434	0.508325
RNF214	4	0.24847	0.50965
H3C1	3	-0.61082	0.510752
CDC37	2	0.61038	0.510752
WIF1	4	-0.18895	0.510788
KRT74	4	-0.41976	0.510789
LGR6	4	-0.17994	0.510789
SECISBP2L	3	-0.13715	0.510789
DHX15	4	0.55943	0.510789
MAVS	3	-0.45608	0.513261
CYP4B1	3	-0.31343	0.513261
ZC3H4	3	-0.90756	0.513387
MRPS36	3	-0.79554	0.513387
FAM71D	2	0.16435	0.513387
SOX17	3	0.3679	0.513387
LRP5	4	0.42321	0.513387
PRR35	2	0.45365	0.513387
ZNF446	3	0.73018	0.513387
LIMD2	3	0.094143	0.514789
DHRS3	4	0.67438	0.515612
ALG13	2	0.4426	0.518795
NAIF1	3	0.57296	0.518795
FOXP1	4	-0.56991	0.520149
ATG16L2	4	0.056296	0.520668
METTL7A	4	0.41259	0.520668
FXYD4	4	0.45944	0.520668
BORCS6	3	0.50479	0.520668
DDX6	4	0.56749	0.520668
TEAD4	3	0.019503	0.524188
TMEM175	4	0.40689	0.524188
PCF11	4	0.53407	0.524188
IFT122	4	0.16922	0.524873
MYH15	4	0.35783	0.524873
NMI	4	0.50896	0.524873
PRDX2	3	0.64498	0.524873
GATA6	4	0.40021	0.525089
ATP13A1	3	0.41198	0.525089
LAT2	3	0.10567	0.528509
SRL	3	0.54957	0.528509
PRIM1	4	0.04405	0.528751
ACP5	4	0.52473	0.528751
BNC1	4	0.38815	0.529258
SMC6	4	0.62041	0.530746
NAP1L3	4	0.075183	0.531109
ST6GAL1	4	-0.50596	0.533253
ZMYND8	4	-0.50568	0.533253
LURAP1L	4	-0.42885	0.533253
ZNF385A	4	0.36967	0.533253
ADAM17	4	-0.3694	0.536955
C18orf63	2	-0.69933	0.538408
UPF3B	4	-0.32653	0.538408
CCDC117	3	0.53628	0.538408
PINLYP	3	0.67269	0.538408
NT5C	3	0.9034	0.538408
OR2A2	4	-0.61447	0.540561
CHP1	4	-0.53889	0.540561
CNTFR	4	-0.30543	0.544188
MS4A15	4	0.33467	0.544188
TIPARP	4	0.49307	0.54808
SLC17A9	4	-0.59856	0.54828
MAN2C1	4	0.3984	0.54828
STRA6	3	0.40354	0.54828
SYTL1	4	0.42005	0.54828
DDX19B	4	0.52591	0.54828
SPC24	3	0.73809	0.54828
UBA52	3	0.82705	0.54828
PSMC4	2	-1.2791	0.548625
HHATL	3	-0.80656	0.548625
FBRS	3	-0.67791	0.548625
MAP3K7CL	3	-0.56312	0.548625
FBXO25	3	-0.53378	0.548625
C1QL1	3	-0.50633	0.548625
SLC16A8	3	-0.46726	0.548625
BVES	4	-0.46157	0.548625
NEURL3	2	-0.44955	0.548625
VTCN1	3	-0.42862	0.548625
SLC9A3R2	2	-0.42011	0.548625
XDH	4	-0.36925	0.548625
SKAP1	4	-0.33861	0.548625
TMEM143	4	-0.28057	0.548625
DCLRE1C	3	-0.2628	0.548625
MRPL9	4	-0.18852	0.548625
PPM1A	3	-0.081955	0.548625
SLC10A2	3	0.29	0.548625
NFIB	4	0.32907	0.548625
CD22	3	0.36465	0.548625
CD86	3	0.3668	0.548625
KLHL35	4	0.37912	0.548625
PCDH8	3	0.38342	0.548625
XRRA1	2	0.45603	0.548625
POTEF	2	0.45906	0.548625
PEX5	4	0.45925	0.548625
STRIP1	3	0.47537	0.548625
ANXA8L1	2	0.50801	0.548625
NDUFB11	3	0.5236	0.548625
CEP192	4	0.53271	0.548625
YWHAG	2	0.55131	0.548625
RAE1	3	0.56184	0.548625
COL4A4	4	0.5875	0.548625
CCDC92	3	0.64454	0.548625
ADAMTS10	2	0.74813	0.548625
KLHL17	1	0.76225	0.548625
STT3B	2	0.78951	0.548625
WNT10A	1	0.79915	0.548625
PEX1	3	0.85268	0.548625
VDAC1	3	-0.045667	0.549242
UBASH3B	3	-0.74476	0.550808
BICRA	4	-0.11556	0.550832
OVCH2	4	-0.58168	0.551633
PHETA2	3	-0.46769	0.551633
TXNRD2	4	-0.44101	0.551633
MOB3A	4	-0.39026	0.551633
MFN1	4	-0.35198	0.551633
B3GLCT	4	-0.25576	0.551633
ZNF521	4	-0.12678	0.551633
PSPN	4	0.20022	0.551633
TIMM17A	3	0.28848	0.551633
IFI35	3	0.30448	0.551633
WDR11	4	0.45106	0.551633
TUSC1	4	0.54207	0.551633
SERPINB7	3	0.70146	0.551633
ZNF853	4	-0.45841	0.552614
LONRF2	4	-0.0053805	0.552614
POLDIP2	4	-0.49355	0.553219
GPR84	4	-0.29666	0.553219
RELCH	4	-0.18414	0.553219
ZGPAT	4	-0.1046	0.553219
ADAMTSL4	4	0.23935	0.553219
HECTD3	4	0.29461	0.553219
ATP2B1	4	0.37665	0.553219
PTPN4	4	0.27932	0.553634
RCC2	4	0.31331	0.553634
NWD2	4	0.31663	0.553634
DNAJC17	4	0.54634	0.553634
EXOC3L1	2	0.5731	0.553634
SF3B3	4	0.87019	0.553634
NCBP3	4	0.064936	0.553942
AHNAK	2	0.59023	0.554629
FUT1	3	-0.37436	0.555734
LYRM1	4	-0.10866	0.555734
CCNF	4	0.27814	0.555734
XPO4	4	0.34439	0.555734
PTPRB	3	0.37988	0.555734
TCTN3	3	0.41606	0.555734
AP1M1	4	0.42273	0.555734
NKX6-2	3	0.42441	0.555734
ACOX1	4	0.55034	0.555734
DIMT1	4	0.57544	0.555734
SSBP3	2	0.60547	0.555734
MST1	3	0.61296	0.555734
EXOSC8	4	0.79788	0.555734
MRM2	3	-0.58052	0.557195
SMOC2	4	-0.53523	0.557195
CSNK1A1L	4	-0.3485	0.557195
SHOC2	4	-0.14968	0.557195
TMEM130	4	-0.068187	0.557195
ADAMTS18	4	-0.04945	0.557195
LRP11	4	0.0090226	0.557195
NXT2	4	0.056526	0.557195
ELAVL1	4	0.078894	0.557195
UBE2E3	4	0.17863	0.557195
NCAPD3	4	0.23818	0.557195
SLC13A4	4	0.35208	0.557195
RASA2	4	0.36461	0.557195
NIP7	4	0.40155	0.557195
NTN4	4	0.41752	0.557195
MUS81	4	0.41872	0.557195
ZNF687	4	0.48717	0.557195
TAF1D	4	0.49741	0.557195
UACA	4	0.52376	0.557195
TAF10	1	0.74288	0.557195
SMU1	4	0.80973	0.557195
NCOR1	3	-0.82995	0.55893
CRB1	4	-0.50983	0.55893
TNFSF10	4	-0.19774	0.55893
SPRED1	4	0.1366	0.55893
SRRM5	4	0.15662	0.55893
CLDN19	4	0.1948	0.55893
ZPR1	4	0.27803	0.55893
TFCP2L1	4	0.34227	0.55893
ZNF730	4	0.36258	0.55893
IL37	4	0.38479	0.55893
TEX14	4	0.39081	0.55893
CCDC110	4	0.42405	0.55893
PGAM5	4	0.44106	0.55893
EDNRB	3	0.50809	0.55893
RPS6	4	0.82791	0.55893
HOXC13	1	1.0079	0.559369
ASCL3	2	0.60722	0.570019
OSBP2	2	-0.48624	0.571717
ZMYM2	4	-0.30635	0.571717
GLUD1	4	-0.58165	0.572115
N4BP2L2	4	0.62538	0.572115
UBE2J1	4	-0.68142	0.572393
RPS6KA5	4	0.050175	0.572393
ZNF768	4	0.54976	0.572393
TMEM242	4	-0.43984	0.572425
ATP5F1A	4	-0.61297	0.573266
ANKIB1	4	-0.47616	0.574645
CCDC130	1	1.2525	0.574974
FRG2	1	0.84599	0.578081
MSANTD1	2	0.57534	0.582286
ADAMTS8	4	-0.13339	0.582735
RBMXL1	4	0.33802	0.582735
CENPH	4	0.42956	0.582735
ECPAS	4	0.57312	0.582735
ARMC7	4	0.79901	0.583084
PKD1	1	-0.75215	0.584347
IARS1	4	0.26477	0.584347
SMCO2	4	0.29614	0.584347
CELSR3	3	0.43316	0.584347
STIP1	3	0.55457	0.584347
POMK	4	0.21461	0.584468
BRIX1	4	0.45083	0.584468
JAKMIP1	4	0.53851	0.584468
PET117	2	-0.79735	0.586452
P2RY13	4	-0.45989	0.586452
RNF185	3	0.33108	0.587871
WWP2	4	0.4221	0.587871
SNX1	4	-0.76398	0.589492
TCHH	2	-0.61599	0.589492
GCNA	3	-0.60026	0.589492
GNA12	4	-0.52519	0.589492
DYNAP	4	-0.49671	0.589492
GPR19	4	-0.37298	0.589492
MIR1-1HG	4	-0.30826	0.589492
KIT	4	-0.18193	0.589492
FAM110A	4	-0.14135	0.589492
CCDC68	4	-0.12032	0.589492
SERINC1	3	-0.059323	0.589492
NABP1	4	0.073566	0.589492
RPL11	3	0.12291	0.589492
CUX1	4	0.26495	0.589492
PCNX1	4	0.36786	0.589492
HM13	3	0.37985	0.589492
LUC7L3	4	0.42067	0.589492
PLS1	3	0.4265	0.589492
ELAVL3	4	0.43416	0.589492
KCTD14	2	0.43583	0.589492
SEPHS1	3	0.43975	0.589492
POLR2B	4	0.44629	0.589492
KIF11	4	0.51239	0.589492
NCAPH	4	0.54009	0.589492
KIDINS220	4	0.56441	0.589492
NRF1	3	0.61702	0.589492
CDC16	4	0.63186	0.589492
PRPF6	2	0.89279	0.589492
PTPN11	1	-1.8326	0.589752
CRIP1	4	-0.42824	0.589752
WNT11	2	-0.45444	0.59091
C8orf87	4	-0.3912	0.592092
KCNK3	2	-0.19316	0.592092
POLR3K	4	0.65877	0.592092
VDAC2	2	-0.41512	0.593016
EIF1AD	4	0.74671	0.593041
GUK1	2	1.0669	0.593041
HSF4	2	-0.63144	0.593237
SCN2B	3	-0.57838	0.593237
ELOVL5	4	-0.50725	0.593237
THEM4	2	-0.49463	0.593237
TMEM192	4	-0.41969	0.593237
RLN1	4	-0.38324	0.593237
LRRC17	4	-0.2454	0.593237
SNUPN	4	-0.10531	0.593237
DGKZ	3	-0.005282	0.593237
CDYL	4	0.048782	0.593237
SLC39A3	4	0.052901	0.593237
WDR24	4	0.075726	0.593237
CYP2F1	4	0.078447	0.593237
WDR88	3	0.18951	0.593237
PDZD3	4	0.20247	0.593237
ZZZ3	4	0.22536	0.593237
TSPO2	4	0.26109	0.593237
MVD	4	0.28811	0.593237
ZCCHC4	4	0.29389	0.593237
DDI1	3	0.35592	0.593237
TAS2R4	4	0.36134	0.593237
PARP1	4	0.36818	0.593237
KCNC3	4	0.37893	0.593237
TYK2	4	0.42179	0.593237
TMEM176B	3	0.42594	0.593237
RAB11FIP2	4	0.42803	0.593237
AP2S1	4	0.45776	0.593237
FOLH1	2	0.49198	0.593237
CCDC88A	4	0.49286	0.593237
SALL1	4	0.52817	0.593237
ARMC9	3	0.53102	0.593237
CDCA3	4	0.57332	0.593237
CD3EAP	4	0.64988	0.593237
PAX8	3	0.65736	0.593237
CCDC115	4	0.67603	0.593237
MFSD14B	3	-0.86013	0.593405
SOD1	2	-0.021315	0.593405
BRSK1	3	0.31396	0.593405
STK36	4	0.37765	0.593405
CYLD	4	0.43169	0.593405
TP53I13	4	-0.29248	0.59391
SHOX2	3	-0.63456	0.595146
GNRH2	4	-0.5996	0.595146
TMEM171	4	-0.58805	0.595146
C12orf65	3	-0.59945	0.595593
DMXL2	3	-0.86387	0.595767
TATDN1	4	-0.50056	0.596103
BICD2	4	-0.47653	0.596875
FBXL17	3	-0.89202	0.597796
MSN	2	-0.8376	0.597796
YPEL3	3	-0.61675	0.597796
TNFRSF10C	4	-0.57614	0.597796
PIPOX	3	-0.57183	0.597796
KCNN3	2	-0.55649	0.597796
EMP1	3	-0.50665	0.597796
NCOA5	4	-0.38177	0.597796
WDR27	3	-0.37162	0.597796
ACTG2	4	-0.35918	0.597796
GBP4	4	-0.33427	0.597796
ATP6V0A4	4	-0.32256	0.597796
CA14	4	-0.22641	0.597796
CD99L2	4	-0.1868	0.597796
BCL9	3	0.13974	0.597796
ACADSB	4	0.28001	0.597796
RNF216	4	0.30964	0.597796
RBM12	4	0.32485	0.597796
DCUN1D5	4	0.40836	0.597796
PPAT	4	0.41083	0.597796
SYT3	4	0.41883	0.597796
SATB1	3	0.43162	0.597796
ACTN4	4	0.5975	0.597796
PDE6G	3	0.63367	0.597796
PNKD	2	-0.70915	0.598679
TRIM35	2	-0.36231	0.598679
USP39	4	0.18405	0.598679
EXOSC9	4	0.19911	0.598679
AP1M2	4	0.2193	0.598679
ZNF585B	4	0.26125	0.598679
CDK11A	4	0.26364	0.598679
ALKBH8	4	0.30108	0.598679
PLA2G4C	4	0.40599	0.598679
ZNF546	4	0.50519	0.598679
PDE8A	4	0.5273	0.598679
NBPF10	2	0.66573	0.598679
ATP2A1	4	-0.38019	0.60013
MYNN	4	0.14397	0.60013
MAGEA10	4	0.22029	0.60013
MECOM	4	0.2889	0.60013
GPX2	4	0.34422	0.60013
PTPRA	4	0.52148	0.60013
C19orf12	3	0.55231	0.60013
LSM11	4	0.56157	0.60013
P3H4	3	0.69198	0.60013
GLI4	4	0.32619	0.600607
ZNF189	3	-0.96401	0.601688
FCER1G	2	-0.69327	0.601688
DHRSX	2	-0.43615	0.601688
PATL2	3	-0.42259	0.601688
PDZD11	3	-0.22581	0.601688
EXOSC4	4	0.050205	0.601688
CBFB	4	0.15439	0.601688
HOOK2	4	0.2515	0.601688
ATF5	3	0.34074	0.601688
GARS1	4	0.40658	0.601688
SPATA13	3	0.41575	0.601688
ZNF44	4	0.42999	0.601688
ABCB9	3	0.43335	0.601688
RB1CC1	4	0.47908	0.601688
NUP93	3	0.53963	0.601688
RBM22	4	0.54433	0.601688
TAMM41	4	0.66659	0.601688
SLC25A17	2	0.67462	0.601688
MRE11	3	0.71309	0.601688
HSD17B3	3	0.77066	0.601688
UTP4	4	0.69262	0.602388
APOA2	4	-0.40048	0.602454
AVPR2	4	-0.30614	0.602454
OGDH	4	0.37538	0.602454
C2orf78	3	0.45048	0.602454
CDH17	4	-0.36789	0.602535
DPY30	2	0.98429	0.602538
BMP8A	3	0.67246	0.602721
SLITRK5	4	-0.41524	0.603851
ATR	3	-0.38406	0.604084
POLR3B	3	0.068298	0.60511
PPP1R15A	3	0.69655	0.60511
KCNJ1	3	0.63902	0.605776
ZNF517	3	0.81014	0.605776
PLAC9	2	-0.8126	0.61332
CDC42	1	-0.77498	0.61332
RSAD2	4	-0.59156	0.61332
DNAH2	4	-0.50677	0.61332
STMND1	4	-0.37084	0.61332
GBP5	3	-0.35943	0.61332
DEFB124	4	-0.30507	0.61332
IDO1	4	-0.27279	0.61332
MBD4	4	0.048479	0.61332
PBLD	4	0.2203	0.61332
ZNF623	4	0.25865	0.61332
HYLS1	4	0.30693	0.61332
OLFM2	2	0.33052	0.61332
LETMD1	4	0.38628	0.61332
LCAT	4	0.39861	0.61332
CEACAM19	2	0.44398	0.61332
CEP57	4	0.52682	0.61332
NR2F6	2	0.55451	0.61332
ABHD15	2	0.55493	0.61332
DPH3	4	0.58724	0.61332
FDPS	2	0.63967	0.61332
FEM1B	3	0.33352	0.614337
MDC1	3	0.53565	0.614337
SLBP	4	-0.57806	0.614625
MRPL19	4	-0.43124	0.614625
CSPG5	3	-0.4011	0.615412
MYBL2	3	0.46685	0.615412
CYP26B1	4	-0.33997	0.615537
TNFSF4	4	-0.31991	0.615537
CCDC50	4	-0.30305	0.615537
TEKT1	4	-0.29028	0.615537
HMGXB3	4	-0.27312	0.615537
RRM2	8	-0.11212	0.615537
ADAMTS1	4	-0.021974	0.615537
PSMD13	4	0.01031	0.615537
SLC5A9	3	0.050821	0.615537
RNF31	4	0.27499	0.615537
PTPRH	3	0.27963	0.615537
ITGA6	4	0.29059	0.615537
IL18BP	4	0.31674	0.615537
PES1	4	0.36543	0.615537
MINDY1	4	0.38628	0.615537
PTPRR	4	0.3987	0.615537
S100A8	3	0.4778	0.615537
DDX3X	3	0.49222	0.615537
FNTA	4	0.50889	0.615537
E2F3	3	0.53764	0.615537
B3GNT6	3	0.59959	0.615537
OSGEPL1	2	0.6932	0.615537
FOXD4L5	3	0.42182	0.616872
TMEM79	3	0.60163	0.616872
USP3	2	-0.69056	0.618216
CHPF	2	-0.46216	0.618216
TAFA2	3	-0.38223	0.618216
YIPF1	4	-0.15486	0.618216
RPS14	1	1.0302	0.618216
RPL10A	2	1.0455	0.618216
CRACD	4	-0.58308	0.619231
OTOG	4	-0.37057	0.623875
LAMC1	4	-0.18156	0.626762
MAN2B2	4	-0.12671	0.626762
IBTK	4	0.26303	0.626762
CCDC61	3	0.30761	0.626762
OXSM	4	-0.46515	0.626892
RICTOR	3	0.33976	0.628672
ZDHHC23	2	0.14304	0.62897
IFNLR1	3	0.34523	0.629421
C14orf119	4	0.37937	0.629421
TMEM159	3	0.067369	0.629742
SDCCAG8	4	-0.78683	0.631689
GABRE	3	-0.7241	0.631689
C1orf50	4	-0.56125	0.631689
BAHD1	4	-0.53398	0.631689
ARHGAP31	4	-0.45318	0.631689
TRIM15	4	-0.35754	0.631689
KCNV1	4	-0.32754	0.631689
SEZ6	4	-0.25302	0.631689
PCED1A	4	-0.24777	0.631689
DIXDC1	4	-0.17942	0.631689
PHACTR4	4	-0.10971	0.631689
MYO3A	4	-0.099094	0.631689
PSMG1	4	0.0037996	0.631689
DND1	4	0.081128	0.631689
PHF2	4	0.23472	0.631689
KCNN1	2	0.24757	0.631689
KHNYN	4	0.31629	0.631689
PTPRJ	3	0.31788	0.631689
SPATA32	4	0.3485	0.631689
HCN4	4	0.39925	0.631689
PEX10	4	0.42765	0.631689
APOE	4	0.42932	0.631689
PLCB3	4	0.44059	0.631689
OCIAD1	3	0.48244	0.631689
FTSJ3	3	0.52165	0.631689
RALB	4	0.53232	0.631689
NR2E3	2	0.54707	0.631689
AAAS	2	0.55101	0.631689
CCT4	4	0.60451	0.631689
RAB5C	2	0.63586	0.631689
COPS5	3	0.82061	0.631689
PSMD3	3	0.93228	0.631689
NOP2	2	0.95985	0.631689
RPL18	3	1.3228	0.631689
LIPC	3	-0.42404	0.631851
CLCN4	4	-0.32978	0.631851
GBE1	4	0.37529	0.631851
MRPL51	4	0.50317	0.631851
EID2	2	0.58541	0.632959
N4BP2L1	4	-0.66536	0.633417
UBE2J2	4	-0.2564	0.633417
CD48	4	0.12061	0.633417
DERL2	3	-1.1977	0.634067
PPP6R1	3	-0.80946	0.634067
ZNF511	2	-0.77204	0.634067
CCDC81	2	-0.72379	0.634067
ACBD7	1	-0.70426	0.634067
MAP3K7	4	-0.53877	0.634067
C1orf210	3	-0.41808	0.634067
CLTRN	4	-0.41331	0.634067
ANKRD37	4	-0.40689	0.634067
SLC25A46	3	-0.38928	0.634067
PCGF1	4	-0.35525	0.634067
FAM104B	4	-0.32687	0.634067
PHYHIPL	4	-0.30726	0.634067
OASL	4	-0.30471	0.634067
SRP14	3	-0.29369	0.634067
RSPH9	3	-0.27798	0.634067
CCN2	4	-0.1989	0.634067
COBL	4	-0.053128	0.634067
ELF4	4	0.027291	0.634067
TCF25	3	0.070036	0.634067
RPP40	4	0.070845	0.634067
JCHAIN	4	0.094384	0.634067
ZNF106	3	0.097517	0.634067
SSC5D	4	0.11931	0.634067
CCR10	4	0.39838	0.634067
ARHGAP45	4	0.40453	0.634067
ZNF777	4	0.42393	0.634067
PAG1	3	0.44354	0.634067
ZNF154	4	0.54108	0.634067
EIF2S1	4	0.55271	0.634067
THBS4	3	0.60816	0.634067
RPS3A	1	1.2269	0.634067
GFM2	3	-1.0492	0.636724
CRPPA	3	-0.80746	0.636801
ART3	3	-0.4822	0.636801
GNAQ	4	-0.28581	0.636801
USP15	3	0.33741	0.636801
ZNF625	4	0.4097	0.636801
BMS1	2	0.70782	0.636801
EFHC1	3	-0.53138	0.637923
BPIFB2	4	0.065303	0.637923
PYGO2	4	0.18455	0.637923
CCL26	4	0.31655	0.637923
ORC4	4	0.35526	0.637923
ODC1	4	0.36366	0.637923
SH3GL1	3	0.45741	0.637923
AARS1	4	0.4735	0.637923
RCC1L	2	0.83117	0.637923
RPS24	3	1.2676	0.637923
CTF1	2	-0.48199	0.63894
DGKA	3	-0.4445	0.63894
ZNF70	4	0.17415	0.63894
RASGEF1A	4	0.26058	0.63894
CLDN1	4	0.34661	0.63894
CASP1	3	0.49856	0.63894
ZFHX4	4	-0.23138	0.638963
BICRAL	4	-0.47792	0.639345
GTF2H4	4	0.50199	0.639996
TM4SF1	4	0.18084	0.64004
TRMT12	3	0.44687	0.643627
PIBF1	3	0.52892	0.643627
TCF4	2	-0.86227	0.644449
PSMB10	3	0.31413	0.644449
PDPN	2	-0.27228	0.6459
H3C7	3	-0.65168	0.646103
MORC4	3	-0.361	0.646103
SNED1	3	0.029165	0.646103
TRIAP1	3	0.87527	0.646103
STXBP5	3	-0.70845	0.646349
ZNF350	3	0.01429	0.646349
TNNC2	4	0.15479	0.646349
TOP1MT	3	0.46135	0.646349
LARP1	4	0.30844	0.646989
GCNT3	4	-0.61161	0.647261
METTL9	3	-0.29041	0.647261
PRAM1	2	0.55595	0.647261
NUP35	3	-0.81927	0.647269
SLC38A11	3	-0.50484	0.647269
RPS6KA2	4	-0.32382	0.647269
ZNF30	4	0.15686	0.647269
XPA	4	0.37729	0.647269
AVPR1B	4	0.43317	0.647269
NUB1	1	-0.85445	0.647904
NUDC	3	0.87549	0.64984
BAG4	3	-0.37195	0.649987
ZNF157	3	0.26607	0.650045
PTMA	3	-0.86466	0.651386
HDAC7	3	-0.8504	0.651386
SLC25A51	2	0.42691	0.651386
SLC41A1	3	-0.32896	0.651408
MAP6D1	4	0.2404	0.651408
LEMD2	4	0.33947	0.651408
CCDC122	4	0.36402	0.651408
FNDC7	4	0.38111	0.651408
CUBN	4	-0.37148	0.652782
ZSWIM7	4	0.33434	0.652782
CTNNBL1	4	0.67049	0.652782
SLC30A9	2	-0.9362	0.65321
TTC9B	2	-0.76969	0.65321
C6orf226	3	-0.48838	0.65321
ACOT4	3	-0.42639	0.65321
H2AW	4	-0.3977	0.65321
MROH2A	3	-0.38119	0.65321
FBP2	2	-0.35074	0.65321
WFDC3	3	-0.34724	0.65321
MID1IP1	4	-0.33629	0.65321
SPARCL1	4	-0.32108	0.65321
LRRC59	4	-0.29524	0.65321
BTN2A2	4	-0.27313	0.65321
TSNAXIP1	4	-0.26256	0.65321
LZTFL1	4	-0.24338	0.65321
IL12B	2	-0.23934	0.65321
PI4KA	3	-0.22095	0.65321
AKR1E2	4	-0.18779	0.65321
NOVA2	4	-0.14889	0.65321
ETV6	4	-0.038444	0.65321
PACC1	4	-0.0040886	0.65321
ZNF211	4	0.20463	0.65321
MMD	3	0.22871	0.65321
IQSEC2	4	0.23472	0.65321
CCT3	4	0.24185	0.65321
TRIM3	3	0.27263	0.65321
CCAR1	4	0.27494	0.65321
ZNF699	4	0.2877	0.65321
ZNF732	4	0.29196	0.65321
GSTP1	4	0.29437	0.65321
RBM11	4	0.30107	0.65321
A4GNT	3	0.30557	0.65321
DHX37	4	0.35009	0.65321
SGCE	4	0.35338	0.65321
CPT1A	3	0.38229	0.65321
UBXN10	3	0.41413	0.65321
SAMD9L	4	0.41833	0.65321
TTLL3	2	0.42346	0.65321
CBX3	3	0.43074	0.65321
GMEB2	4	0.45291	0.65321
UBL3	4	0.46129	0.65321
FSD1	4	0.47921	0.65321
TINF2	3	0.49054	0.65321
HINT3	4	0.49962	0.65321
DAND5	4	0.51998	0.65321
GET3	4	0.54329	0.65321
CNTD2	2	0.56269	0.65321
TFDP1	4	0.56946	0.65321
KLK1	3	0.59687	0.65321
HNF1B	4	0.60842	0.65321
ART1	2	0.62752	0.65321
ARHGEF16	2	0.64019	0.65321
BNIP3	2	0.66287	0.65321
POLR3E	4	0.69234	0.65321
TTK	3	1.0486	0.65321
MAP7D2	1	-0.78146	0.653887
MECP2	4	-0.64949	0.653887
GMFG	3	0.38431	0.653887
KNSTRN	3	0.63537	0.653887
VTN	3	0.48063	0.654508
LNPK	3	-0.25604	0.655654
FOXI3	1	0.78551	0.656041
STS	2	-0.2849	0.656827
EZHIP	3	-0.33046	0.65701
XRCC6	3	0.12868	0.65701
FAAP24	3	0.397	0.65701
TEDDM1	3	0.41506	0.65701
BTG4	3	0.45943	0.657751
COX18	2	-0.68035	0.658575
RRP12	3	-1.2792	0.659095
KDM5C	1	-0.99558	0.659095
RBFA	4	-0.65304	0.659095
DYRK1A	2	-0.60256	0.659095
FASN	4	-0.53457	0.659095
DHX30	4	-0.50904	0.659095
PTGR2	3	-0.50321	0.659095
CXXC4	4	-0.48954	0.659095
SLC10A3	2	-0.48115	0.659095
LUM	4	-0.43083	0.659095
PRDM1	2	-0.39781	0.659095
H4C1	4	-0.39251	0.659095
B9D1	4	-0.3837	0.659095
PIM1	4	-0.37697	0.659095
HMGCL	4	-0.32161	0.659095
GRHL1	4	-0.3173	0.659095
GLOD5	4	-0.31666	0.659095
NR1I2	4	-0.30467	0.659095
MKX	3	-0.19945	0.659095
TXNDC11	4	-0.17383	0.659095
TIMM8B	4	-0.019203	0.659095
TXNRD3	4	0.16763	0.659095
GPR62	3	0.18099	0.659095
PLXNB2	4	0.26188	0.659095
APEH	4	0.29761	0.659095
CHMP5	4	0.31478	0.659095
MMS22L	4	0.3174	0.659095
LOC100506422	4	0.33361	0.659095
DCAF8	4	0.34787	0.659095
WFDC1	4	0.35472	0.659095
KRTAP5-9	3	0.40163	0.659095
MUC16	4	0.419	0.659095
IPO8	3	0.51757	0.659095
TC2N	4	0.52033	0.659095
TTF1	4	0.54485	0.659095
SNRNP25	4	0.59633	0.659095
H2BC4	2	0.60687	0.659095
H1-2	4	0.62495	0.659095
MYRF	2	0.64282	0.659095
PCDHGA12	2	0.74294	0.659095
POLR2C	3	0.97988	0.659095
SLC35E2A	1	-1.1526	0.659482
HMX1	3	-0.9749	0.659482
C6orf47	2	-0.90613	0.659482
FBXL4	2	-0.58914	0.659482
PPL	2	-0.53679	0.659482
TWIST1	3	-0.4967	0.659482
MEF2C	3	-0.49225	0.659482
LRRCC1	4	-0.4768	0.659482
DNAJC14	4	-0.39861	0.659482
CYP27A1	3	-0.37192	0.659482
HNRNPLL	4	-0.35509	0.659482
TCP11L1	3	-0.33505	0.659482
CLEC19A	3	-0.064015	0.659482
EDC3	3	-0.060631	0.659482
GSTA4	4	-0.039362	0.659482
RPUSD3	4	0.067461	0.659482
IL17D	3	0.17819	0.659482
PALM	4	0.19024	0.659482
SP3	4	0.20218	0.659482
RAB27B	3	0.20728	0.659482
DUSP5	3	0.26829	0.659482
PI3	4	0.33903	0.659482
SOWAHC	3	0.34309	0.659482
ZNF710	3	0.35073	0.659482
WASHC4	3	0.36985	0.659482
SLC8B1	4	0.40397	0.659482
NINJ1	4	0.40789	0.659482
OGFOD3	4	0.44676	0.659482
HEATR5B	4	0.46083	0.659482
IGFL2	3	0.4693	0.659482
TAS2R5	3	0.48329	0.659482
ERCC3	4	0.51611	0.659482
BUD31	4	0.53239	0.659482
DTYMK	4	0.56393	0.659482
HARS2	4	0.60039	0.659482
ECT2	3	0.62158	0.659482
RPL27A	1	1.3118	0.659482
ZBTB5	3	-0.40087	0.659483
ANKRD1	3	0.38841	0.659483
CCDC93	4	0.45141	0.659483
ETFA	3	0.24325	0.65953
TEX43	2	-0.92517	0.660936
ZNF280C	3	-0.45691	0.660936
RYR2	2	0.62371	0.660936
HAND2	3	-0.34461	0.66116
TPGS2	3	-0.71715	0.661979
SLC24A2	3	-0.57926	0.661979
SAP25	3	-0.53203	0.661979
DR1	4	0.10418	0.661979
CD79A	4	0.36794	0.661979
KCNG3	3	-0.7265	0.663367
OSBP	3	-0.6552	0.663367
ANKRD31	2	-0.63516	0.663367
NXPH3	4	-0.61423	0.663367
BCKDK	4	-0.5568	0.663367
DARS2	4	-0.50912	0.663367
CD1D	4	-0.49107	0.663367
EPHA1	4	-0.44404	0.663367
ZFPL1	4	-0.38182	0.663367
TEX38	4	-0.30073	0.663367
C9orf139	4	-0.27878	0.663367
ITPRIP	4	-0.2727	0.663367
COL27A1	4	-0.23175	0.663367
WDR54	4	-0.20536	0.663367
CDNF	3	-0.16944	0.663367
LSMEM2	4	-0.14426	0.663367
CNTRL	4	-0.099997	0.663367
PTGS2	4	-0.026999	0.663367
CHRM4	4	0.04301	0.663367
BCAS4	3	0.11656	0.663367
CETN3	4	0.17742	0.663367
CCDC71	4	0.23285	0.663367
GASK1A	4	0.2469	0.663367
CTRL	4	0.25618	0.663367
ZNRF1	4	0.27367	0.663367
JAGN1	4	0.30891	0.663367
TMEM135	3	0.33565	0.663367
YJU2	4	0.34812	0.663367
CAMLG	4	0.36509	0.663367
MAP4K1	4	0.36876	0.663367
ZNF506	4	0.39676	0.663367
USF3	2	0.39846	0.663367
ZBTB20	4	0.40512	0.663367
COX20	2	0.41167	0.663367
ACSF2	4	0.41616	0.663367
OSBPL9	2	0.45164	0.663367
LARP4B	4	0.45319	0.663367
RAB6A	4	0.45329	0.663367
COL6A6	3	0.46134	0.663367
SCAF4	4	0.46847	0.663367
COPS8	4	0.4704	0.663367
LZTS3	3	0.47741	0.663367
DCTN4	4	0.48344	0.663367
ST13	4	0.50299	0.663367
BLOC1S2	3	0.52113	0.663367
GALNT10	2	0.55306	0.663367
FOXM1	4	0.56523	0.663367
AOC1	1	0.66909	0.663367
USE1	3	0.67269	0.663367
CSNK2B	4	0.70923	0.663367
NOP14	4	0.72101	0.663367
KXD1	1	0.74121	0.663367
ABT1	4	0.84735	0.663367
RPL37A	1	1.0583	0.663367
MEX3C	4	0.25803	0.664139
COG4	3	0.56929	0.664139
GABRA2	4	-0.45604	0.664722
HGD	3	0.29792	0.664722
SMC4	4	0.45003	0.664722
PAM	3	0.30215	0.665432
CABP4	3	0.62379	0.665432
CEP41	3	0.33758	0.665929
PELI2	3	0.30472	0.666824
DUSP22	3	-0.82192	0.667974
MTMR6	3	-0.52999	0.667974
ASCC1	3	-0.45128	0.667974
AIFM3	4	-0.35707	0.667974
TAB3	3	-0.096678	0.667974
SIRT4	4	-0.060589	0.667974
CNOT6L	4	0.1251	0.667974
MVB12A	4	0.2804	0.667974
TBCEL	4	0.2892	0.667974
TCEA2	4	0.3362	0.667974
ZNF653	4	0.33937	0.667974
C3orf22	4	0.35329	0.667974
RALA	4	0.37292	0.667974
DDIAS	4	0.39911	0.667974
MYOZ1	3	0.41396	0.667974
CERS2	3	0.5588	0.667974
EIF3K	3	0.56381	0.667974
CDC6	3	0.78016	0.667974
SLC25A20	3	-0.59012	0.667999
RNF41	4	-0.54354	0.667999
PPP1R42	3	-0.36022	0.667999
MINDY3	4	-0.35453	0.667999
PLPBP	4	-0.32301	0.667999
ALKAL2	3	-0.29082	0.667999
OTP	3	-0.28691	0.667999
ZNF577	3	-0.23902	0.667999
DNAH11	4	0.0071719	0.667999
ELMO2	4	0.29978	0.667999
DPY19L3	4	0.3742	0.667999
PHB	4	0.41284	0.667999
GBF1	4	0.47593	0.667999
GOSR2	4	0.53249	0.667999
TOMM34	2	0.63724	0.667999
SPCS2	1	0.93074	0.667999
OBSL1	3	-0.39055	0.668579
FAM126B	3	-0.34061	0.668579
HMGN2	4	0.41819	0.669083
MAP2K5	3	0.47728	0.669083
AURKB	4	0.52222	0.669083
TBXT	3	-0.36036	0.670958
TANGO6	3	-1.1979	0.671625
FAHD1	3	0.3536	0.672106
MRFAP1	2	-0.54773	0.672531
SPIB	2	0.49427	0.673899
ADAM33	3	-0.56318	0.676194
TMUB1	3	-0.53317	0.676194
ANGPTL2	2	-0.49451	0.676194
H1-7	4	-0.49387	0.676194
CCN3	4	-0.34348	0.676194
PSMF1	2	-0.31553	0.676194
USP27X	4	-0.18303	0.676194
ZNF133	4	-0.017196	0.676194
EXOSC7	3	0.090165	0.676194
RNF8	4	0.20346	0.676194
ALKBH4	4	0.22487	0.676194
ENKD1	4	0.22511	0.676194
C11orf94	4	0.25475	0.676194
PSMC6	4	0.28119	0.676194
GRTP1	4	0.30178	0.676194
PCDHA10	3	0.30835	0.676194
ZNF432	3	0.3905	0.676194
PIWIL2	3	0.4371	0.676194
ZSCAN23	4	0.43725	0.676194
B4GALT1	2	0.46997	0.676194
ANKRD49	3	0.87706	0.676194
LGALS7B	1	0.92998	0.676194
NOLC1	3	1.1243	0.676194
HIC2	4	0.068892	0.677597
PSG4	3	0.40931	0.68005
RAB11FIP4	2	0.56603	0.68005
KRT18	1	-0.83421	0.680518
C1orf167	4	0.24493	0.680622
SH2D1B	4	0.11251	0.681035
AJAP1	3	0.11054	0.682532
KIF5A	2	0.42107	0.682532
TMEM255B	3	-0.24987	0.68306
TSN	4	0.30283	0.68306
RNF169	4	0.32666	0.68306
SNX32	3	0.42974	0.68306
ATAD1	4	0.64791	0.68306
CLRN3	4	-0.4346	0.683571
BAIAP3	4	0.29085	0.683571
PNPLA2	3	0.28399	0.683665
PPRC1	3	0.44562	0.683665
NAA16	3	0.043062	0.684308
DUSP6	3	-0.71839	0.684499
YBX1	1	0.51676	0.685566
SPIN2B	1	0.54091	0.685566
IRF4	2	0.14563	0.686027
FAM153B	2	-1.0233	0.686735
ERCC6L	3	-0.82864	0.686735
ZNF408	2	-0.79339	0.686735
DSC2	2	-0.61511	0.686735
TBCA	2	-0.60684	0.686735
INSIG1	3	-0.59643	0.686735
RBMX	3	-0.55508	0.686735
NBPF3	2	-0.54548	0.686735
ARFIP2	4	-0.5454	0.686735
CCNDBP1	3	-0.52538	0.686735
AZGP1	4	-0.51943	0.686735
HIBADH	4	-0.50358	0.686735
CLEC6A	3	-0.48698	0.686735
ABAT	3	-0.46795	0.686735
BSG	4	-0.44176	0.686735
TIMP1	4	-0.43162	0.686735
BHMT2	4	-0.42537	0.686735
PTGR1	4	-0.41304	0.686735
GTPBP2	4	-0.40611	0.686735
RPL22L1	4	-0.40363	0.686735
PLPP1	3	-0.40357	0.686735
USP6NL	4	-0.39771	0.686735
SETD7	3	-0.39654	0.686735
SLC52A1	2	-0.37469	0.686735
LYSMD4	3	-0.35412	0.686735
STMP1	3	-0.34676	0.686735
GABRQ	4	-0.33659	0.686735
ESM1	4	-0.33539	0.686735
DCAF7	4	-0.33364	0.686735
GXYLT1	4	-0.31837	0.686735
DIO2	4	-0.31654	0.686735
KDELR2	3	-0.31025	0.686735
STEAP1B	3	-0.29954	0.686735
ACKR2	4	-0.28844	0.686735
KRBOX1	3	-0.21281	0.686735
EBP	4	-0.17502	0.686735
PSKH1	4	-0.12509	0.686735
NLGN3	4	-0.1104	0.686735
FOXO6	4	-0.080449	0.686735
ENPP3	4	-0.031791	0.686735
KATNA1	3	-0.012879	0.686735
RTL8C	4	0.036424	0.686735
SOAT1	4	0.038081	0.686735
TNK2	4	0.043454	0.686735
SLC1A4	4	0.098125	0.686735
GABARAPL2	4	0.1125	0.686735
TPD52	4	0.13987	0.686735
LOXL1	3	0.15598	0.686735
PKMYT1	4	0.16165	0.686735
EIF1AX	3	0.16673	0.686735
USP1	3	0.17799	0.686735
LYPD6B	4	0.19261	0.686735
ACTL10	3	0.1934	0.686735
CDKN2AIP	4	0.20519	0.686735
SARS2	3	0.20539	0.686735
UBXN6	4	0.21998	0.686735
SERPINA12	3	0.2277	0.686735
CUTC	4	0.23454	0.686735
COPG1	4	0.24912	0.686735
TOMM20	3	0.25639	0.686735
TMEM223	4	0.26097	0.686735
MCMBP	4	0.26214	0.686735
ACOT8	3	0.27134	0.686735
KCNB2	4	0.27382	0.686735
RABAC1	3	0.28477	0.686735
ZNF554	4	0.29764	0.686735
RASGRP2	4	0.29766	0.686735
SLFN13	4	0.31467	0.686735
TRA2A	2	0.33111	0.686735
TRMT6	3	0.33127	0.686735
DPPA4	4	0.34406	0.686735
PAK1	3	0.34534	0.686735
SURF6	4	0.35168	0.686735
TRIM56	3	0.35439	0.686735
UBFD1	3	0.35966	0.686735
DNAJC10	4	0.36033	0.686735
NWD1	2	0.362	0.686735
TAZ	4	0.36437	0.686735
STK24	2	0.38951	0.686735
CRYAB	2	0.39332	0.686735
JADE3	4	0.4026	0.686735
ARMCX6	4	0.4033	0.686735
SEC24C	4	0.41629	0.686735
GRPEL1	4	0.42655	0.686735
FAAP20	3	0.42976	0.686735
HOXD13	3	0.45242	0.686735
SPINT2	4	0.52349	0.686735
SIRT1	2	0.55504	0.686735
CIRBP	2	0.58238	0.686735
VN1R4	1	0.61778	0.686735
SUPT5H	3	0.62108	0.686735
GCN1	3	0.62423	0.686735
UBA3	4	0.66057	0.686735
ATP6V1E1	2	0.67476	0.686735
RPL7A	3	0.78345	0.686735
SNRNP35	4	0.41859	0.686812
SLC5A12	4	-0.36358	0.687222
DLK1	4	-0.0060452	0.687222
EGFR	4	-0.48051	0.688143
LPXN	4	-0.34868	0.688143
C17orf99	3	-0.333	0.688143
ZKSCAN5	3	-0.32802	0.688143
ZNF616	4	-0.32615	0.688143
TERB1	4	-0.12359	0.688143
CHRNG	3	0.27377	0.688143
TRAPPC10	2	0.27656	0.688143
MAP2K7	3	0.36316	0.688143
SAP18	3	0.39487	0.688143
CLPB	2	0.48039	0.688143
SKA2	2	0.53441	0.688143
RPN2	3	1.2399	0.688143
MRPL39	4	-0.6915	0.688162
KCNJ4	3	-0.68094	0.688162
CNTD1	2	-0.56721	0.688162
DENND2B	2	-0.56233	0.688162
FOXP2	3	-0.43396	0.688162
ABCB5	3	-0.41894	0.688162
SYT2	4	-0.37125	0.688162
LIN7B	4	-0.37106	0.688162
C9orf47	4	-0.36033	0.688162
RHOU	4	-0.33808	0.688162
ZSCAN9	3	-0.33663	0.688162
EDA2R	4	-0.32463	0.688162
BLMH	4	-0.31368	0.688162
RTL8A	3	-0.30523	0.688162
C4orf19	4	-0.30042	0.688162
KCNIP4	4	-0.29963	0.688162
ATP5PO	4	-0.28298	0.688162
RAB6B	4	-0.25417	0.688162
SYNJ2	4	-0.22369	0.688162
METTL18	4	-0.1432	0.688162
GUCA2B	4	-0.13714	0.688162
CTBP1	4	-0.11503	0.688162
ATP23	4	-0.1025	0.688162
GPX1	3	-0.036928	0.688162
SLC4A1	4	0.029921	0.688162
E2F1	4	0.036863	0.688162
IMP3	4	0.1813	0.688162
CNTN6	4	0.21927	0.688162
NEUROD2	4	0.25021	0.688162
INHBB	4	0.25949	0.688162
CHST9	4	0.31361	0.688162
RRN3	3	0.33041	0.688162
RCOR2	4	0.33296	0.688162
LMO7DN	4	0.34659	0.688162
BTN2A1	4	0.34727	0.688162
TMEM37	4	0.35907	0.688162
ATF4	2	0.40123	0.688162
C11orf54	3	0.4085	0.688162
TPRKB	4	0.45204	0.688162
PHF5A	4	0.4637	0.688162
PEX6	3	0.49314	0.688162
PRKAB2	3	0.49331	0.688162
TSPAN31	4	0.51357	0.688162
LHX5	3	0.5312	0.688162
NDE1	3	0.53803	0.688162
PIK3C3	4	0.53863	0.688162
UBL5	4	0.59724	0.688162
IL36G	3	0.60821	0.688162
GPX4	3	0.66622	0.688162
LSM7	2	0.68546	0.688162
CXCL1	3	0.69685	0.688162
TBATA	4	-0.55985	0.688621
CREB3L2	4	-0.38989	0.688621
FHL3	4	-0.32065	0.688621
BCAR1	2	0.32178	0.688621
CLPX	4	-0.47613	0.689475
NT5C3B	3	0.49961	0.689475
ABLIM1	4	-0.25367	0.690022
GAS7	4	-0.11569	0.690022
PAX9	3	0.43912	0.690022
SAPCD2	2	0.52674	0.690801
TF	4	0.24001	0.691608
TMEM240	4	0.29126	0.691608
ABHD11	4	0.29783	0.691608
USP48	4	0.38682	0.691608
SCAPER	4	0.42986	0.691608
ASCL2	3	0.54998	0.691608
PCDHB14	3	-0.53548	0.692285
KRT4	3	-0.63283	0.693064
CCNI2	4	-0.087681	0.693064
NAPG	2	0.80373	0.693642
GAL	2	-0.68038	0.694909
TMEM169	3	0.023454	0.694909
TAC4	3	-0.70328	0.695213
TYMP	3	-0.43285	0.695213
PRAC1	3	-0.40849	0.695213
RANBP3	3	0.19081	0.695213
PLSCR4	3	0.53538	0.695213
DRAXIN	3	0.59242	0.695213
RPL7L1	3	0.62947	0.695213
FAM9A	4	-0.50624	0.695513
FOXH1	4	-0.44457	0.695513
ALDH8A1	4	-0.25162	0.695513
NTF4	3	-0.23094	0.695513
BTN3A1	4	-0.19734	0.695513
RASSF1	4	0.12434	0.695513
SLC25A19	4	0.32152	0.695513
KIAA0100	4	0.34525	0.695513
HIC1	4	0.35812	0.695513
SCTR	3	0.50193	0.695513
PAF1	3	0.7969	0.695513
PTPN6	3	0.58403	0.695679
ZNF280B	3	-0.4377	0.695933
ERGIC1	2	-0.35804	0.695933
OSBPL11	4	0.10577	0.695933
GPR152	4	0.37835	0.695933
IP6K1	4	0.45142	0.695933
PISD	4	0.52248	0.695933
ARCN1	4	0.54213	0.695933
DHPS	4	0.67408	0.695933
JADE2	2	-0.82316	0.699272
SH3D21	2	-0.71451	0.699272
ZNF229	3	0.50837	0.699595
TBC1D30	4	-0.45256	0.700274
CACHD1	4	-0.39861	0.700274
CYP39A1	4	-0.27554	0.700274
PPP1R12C	3	-0.5169	0.700725
MIXL1	4	-0.033817	0.704482
MCOLN2	4	0.33062	0.706404
CD52	4	0.35462	0.706404
SLC25A38	4	0.013947	0.706434
FAM217B	1	-0.6604	0.706684
C2CD2	4	0.33755	0.706684
PPFIBP2	4	0.36335	0.706684
GLIPR2	2	-0.65382	0.707256
RAB11B	2	0.49005	0.707256
PON1	3	0.15531	0.707285
[truncated: 13,970 more rows]

## Sheet: test_Cu-DDC_Day14_ DMSO
gene	num	logfc	FDR
MTF1	4	-1.4915	0.000214951
CDKN2A	4	-0.81318	0.000214951
REXO2	4	0.50318	0.000214951
RPUSD3	4	0.55871	0.000214951
PDHA1	3	0.72575	0.000214951
MRPL17	4	0.7419	0.000214951
SGF29	4	0.75103	0.000214951
COX11	4	0.77223	0.000214951
NDUFS1	4	0.77806	0.000214951
LIPT1	4	0.79029	0.000214951
MRPL21	4	0.808	0.000214951
LARS2	4	0.87731	0.000214951
MRPL41	4	0.88082	0.000214951
POLG	4	0.89673	0.000214951
MECR	4	0.89958	0.000214951
DLAT	4	0.90174	0.000214951
QRSL1	4	0.9336	0.000214951
MTG1	4	0.95131	0.000214951
STARD7	4	0.95364	0.000214951
FASTKD5	4	0.98534	0.000214951
PDE12	4	1.0092	0.000214951
TWNK	4	1.01	0.000214951
MRPL15	4	1.0212	0.000214951
CLPP	3	1.0417	0.000214951
MRPS25	4	1.0455	0.000214951
CS	4	1.047	0.000214951
COX17	3	1.1324	0.000214951
PDHX	3	1.1332	0.000214951
CYCS	3	1.1339	0.000214951
PDHB	4	1.1523	0.000214951
AASDHPPT	4	1.1957	0.000214951
FAU	4	1.2084	0.000214951
HARS2	4	1.2207	0.000214951
SLC25A39	4	1.3161	0.000214951
CDK1	4	1.3194	0.000214951
LIPT2	2	1.3493	0.000214951
GCLM	4	1.4688	0.000214951
DNM1L	4	1.4846	0.000214951
LIAS	4	1.6754	0.000214951
RPS27A	1	2.1434	0.000214951
WARS2	4	0.71969	0.000614145
MRPL36	4	0.90871	0.000614145
GLS	3	-0.70812	0.000934534
C7orf26	3	0.79273	0.000934534
MRPS33	4	0.83518	0.000934534
RPL19	2	1.9892	0.000934534
GFM1	4	0.67987	0.00118014
NDUFA6	4	0.82878	0.00118014
GCLC	4	0.84207	0.00118014
SDHAF2	4	0.85921	0.00118014
COX18	2	0.89344	0.00118014
COX14	4	0.70285	0.00128971
COA5	3	0.71333	0.00128971
PTCD3	4	0.8265	0.00128971
MRPS11	4	0.83274	0.00128971
GATB	4	0.83531	0.00128971
COX15	3	1.0415	0.00128971
MRPL51	4	1.2871	0.00128971
DHX15	4	1.6331	0.00128971
ATL2	2	2.1402	0.00128971
MFF	4	0.74402	0.00152545
YARS2	4	0.86319	0.00152545
UQCC2	4	0.63719	0.00164373
NDUFA9	3	0.77652	0.00164373
PPA2	4	0.78638	0.00164373
NDUFB6	4	0.80279	0.00164373
BRPF1	4	0.8095	0.00164373
ELOB	4	1.7232	0.00164373
MRPS7	4	0.63712	0.00171958
SLC25A19	4	0.67323	0.00171958
MRPS16	4	0.78566	0.00171958
COX6B1	4	0.92828	0.00171958
TARS2	4	0.93974	0.00171958
DLD	3	1.0121	0.00171958
COA6	3	1.0399	0.00171958
EARS2	4	1.0471	0.00187394
COPS5	3	1.1841	0.00187394
CIAO1	4	1.3909	0.00187394
RB1	3	-0.54281	0.00201683
GATC	3	1.1641	0.00201683
GTPBP4	4	1.8149	0.00201683
SARS2	3	0.93092	0.0021754
NARS2	3	0.9656	0.0021754
PARS2	4	0.82134	0.00235421
UQCRC1	4	0.60947	0.00247068
PRC1	4	0.88051	0.00247068
NAPA	2	1.1216	0.00247068
METTL17	3	0.79888	0.0026084
TUBGCP4	3	1.0937	0.0026084
MRPL53	4	0.65855	0.00268111
YEATS2	4	0.93874	0.00268111
CMPK1	4	1.098	0.00268111
FPGS	3	1.6118	0.00268111
MARS2	4	0.9913	0.00283552
NDUFAF6	4	0.55167	0.00303969
MRM2	3	0.69544	0.00303969
MRPS9	4	0.70588	0.00303969
CENPW	3	0.96064	0.00303969
AFG3L2	4	0.98544	0.00303969
ATPAF2	4	0.75379	0.00331997
UBA2	4	0.7689	0.00331997
MTO1	4	0.7543	0.00342264
GPX4	3	1.0293	0.00342264
PDZD4	4	-0.54297	0.00388569
CHCHD1	4	0.72328	0.00401233
HSD17B10	3	0.83177	0.00409821
RPL27	3	1.1074	0.00409821
RRN3	3	1.2978	0.00421936
MPC1	4	0.6606	0.0048118
TFAM	4	0.84608	0.0048799
RPS25	2	2.1334	0.0048799
MRPS14	4	1.0006	0.00529686
IDH3A	4	1.0921	0.00550566
UBE2I	4	1.2692	0.00550566
RMND1	4	0.53877	0.00575642
SHMT2	4	0.6443	0.00575642
MRPL34	4	0.80084	0.00575642
SLC25A51	2	0.9277	0.00575642
HCCS	4	0.48377	0.00580367
H2AC6	3	0.8936	0.00580367
TRRAP	3	0.79369	0.00618198
SLFN11	4	0.21358	0.00636111
MRPS23	4	0.70035	0.00636111
UQCR10	4	0.78063	0.00658721
CSTF3	4	0.87727	0.00667198
MRPL13	4	0.66618	0.00670245
NDUFB10	4	0.74919	0.00670245
TIMM9	4	0.85384	0.00678433
MRRF	4	0.67148	0.00713158
RPAIN	3	0.53487	0.00741669
NDUFA8	3	0.76337	0.00741669
CLPX	4	0.85083	0.00788143
CYC1	4	0.82091	0.00802049
RCC1L	2	1.5474	0.00802049
COPZ1	3	1.426	0.00834315
MTERF1	3	0.64706	0.00866029
IMP4	4	0.99808	0.00866029
TUT1	4	1.0578	0.00866029
COX7B	2	0.80274	0.00872183
SSBP1	3	1.1473	0.00902796
FARS2	3	0.81649	0.00908579
NDUFS6	4	0.69984	0.00938505
DBR1	3	-0.16	0.0094398
MRPL2	4	0.69538	0.00973244
MRPS30	4	0.7267	0.00981791
RPUSD4	4	0.73309	0.00981791
POT1	4	0.76108	0.00981791
FDX1	2	1.0253	0.00981791
COQ7	4	0.60593	0.0100984
NDUFB9	4	0.81347	0.0102384
POLR2K	4	0.87638	0.0102384
SUPT16H	4	1.1165	0.0102384
MRPS12	4	0.78429	0.0105522
HAUS5	4	1.0013	0.0105522
MRPS18A	4	0.73706	0.010595
GGPS1	3	1.3593	0.0106372
SPATA5	4	0.85746	0.0111173
NDUFB7	4	0.6011	0.0111936
ATIC	3	0.71206	0.0111936
N6AMT1	4	0.73567	0.0113751
DDX20	4	1.1626	0.0113751
DYNLRB1	4	0.80288	0.0113765
RPLP0	4	1.0576	0.0113765
MRPS2	3	1.12	0.0113765
WDR12	3	1.3984	0.0116204
RUVBL2	4	0.88395	0.0116872
CHMP4B	4	0.89844	0.0116872
MRPL52	3	0.76237	0.0126412
RSL1D1	4	0.50846	0.0133803
OXA1L	3	-0.87231	0.0136468
SLC25A26	4	0.61283	0.0136468
MRPL57	4	1.1787	0.0136468
GNL3	4	1.2821	0.0136674
COQ2	4	0.72062	0.0138853
NDUFS2	3	0.80048	0.0139042
TAF6L	4	0.4932	0.0139598
ARMH3	4	0.65949	0.0139598
PMVK	3	1.0171	0.0139598
ALAS1	4	0.54253	0.0140738
EXOC3	4	0.64241	0.0143778
MCUR1	4	-1.332	0.0144884
SLC25A32	4	0.79846	0.0150817
MRPL12	3	1.0227	0.0150817
MAN2C1	4	0.442	0.0152803
MRPS18B	4	0.51875	0.0154765
DTYMK	4	0.66769	0.0154856
NDUFV1	3	0.71394	0.0156947
CDC16	4	0.90508	0.0156947
KLF5	4	0.93562	0.0156947
MRPL44	4	0.75959	0.0160646
SRP54	4	0.75883	0.0164307
ACD	4	0.57494	0.0166139
PTPMT1	4	0.78005	0.0167948
DARS1	4	0.97944	0.0174177
NDUFB4	3	0.48649	0.0181123
YAE1	3	0.7761	0.0181123
DPH1	3	0.82096	0.0181123
RPS19	4	0.98051	0.0186083
GCSH	2	1.0253	0.0186083
ATP5PD	2	1.1987	0.0186083
CDC27	2	1.3792	0.0186083
COX7C	4	0.87087	0.0199628
ANKRD49	3	0.88343	0.0201037
RPL3	3	1.0725	0.0201037
DYNC1LI2	4	0.62293	0.0201597
TRAPPC11	4	0.7469	0.0201597
CAPRIN1	3	0.84787	0.0209757
MAD2L2	3	0.77123	0.0210407
PET117	2	0.98887	0.0229144
CCDC28B	4	0.55141	0.023664
MRPL16	3	0.61819	0.023664
MFN2	4	0.69175	0.023664
MRPL40	3	0.796	0.023664
EGLN1	3	1.1423	0.023664
MCAT	4	0.63771	0.0248791
COX4I1	3	1.2962	0.0248791
MARCHF5	4	0.74952	0.0253229
STK11	4	0.92239	0.0253229
GADD45GIP1	4	1.0622	0.0253229
NDUFB5	3	0.9319	0.0255199
COPB2	3	1.0845	0.0266502
NFYC	3	0.63994	0.0270284
VPS45	3	1.3761	0.0270284
MRPL30	4	0.61975	0.0281354
MCMBP	4	0.80002	0.0289273
GBF1	4	0.59939	0.0299041
MBTPS1	4	0.80267	0.0299041
PSMD6	4	0.98533	0.0299041
ZKSCAN5	3	-0.60125	0.0312002
NDUFA11	3	0.92605	0.0312145
BUD31	4	0.6673	0.0316753
KAT8	3	0.37973	0.0317721
GTPBP6	4	0.67633	0.0317721
SOX2	4	-0.54825	0.0317882
NDUFA1	4	0.4876	0.0317882
UQCRC2	4	0.66303	0.0317882
HNRNPA2B1	4	0.67506	0.0317882
NUBPL	3	0.71861	0.0317882
EIF4G1	4	0.88411	0.0317882
RPL28	4	1.1733	0.0317882
PSMA6	2	1.6755	0.0317882
DNTTIP2	4	0.48838	0.0322244
TRAIP	4	0.63076	0.0323047
NUP133	3	0.7753	0.0324537
TOP1MT	3	0.85725	0.032462
IFT81	3	-0.93483	0.0325391
MCM5	4	0.90922	0.0333125
PSMB5	4	0.79336	0.0333868
KMT2A	2	0.76052	0.0342198
PURG	3	-0.94884	0.0347703
HMBS	4	0.69199	0.0354461
MRPS21	3	0.77315	0.0354461
OSBPL9	2	1.2102	0.0354461
NOP2	2	1.9007	0.0362534
NRF1	3	0.86234	0.0373261
CIT	4	0.71404	0.0375581
VARS2	4	0.92706	0.0375581
UQCC1	3	1.0638	0.0375581
SNAPIN	4	0.44043	0.037666
GSS	4	0.53883	0.037666
MRPL14	3	0.88943	0.0384443
CERS2	3	0.93391	0.0386255
ZBTB11	4	0.44787	0.0386583
USE1	3	0.85273	0.0386583
SPDYE1	3	0.55272	0.0392259
TAF4	4	0.39412	0.0400486
HNRNPU	3	-0.13426	0.0406713
SLC7A5	4	0.69803	0.041225
SCAP	4	1.0076	0.0420032
RPL10A	3	1.2459	0.0420032
NDUFS3	4	0.47052	0.0420102
EPC2	4	0.70117	0.0420102
MRPS22	4	0.46649	0.0424857
POLR2B	4	0.84607	0.0433648
GTF2B	3	0.90447	0.0433648
AHR	4	-0.43886	0.0447401
ZNF365	4	0.33825	0.0447401
PPIE	4	0.47296	0.0447401
XRN1	4	0.51783	0.0447401
MRPS18C	4	0.56506	0.0447401
BRCA1	4	0.56981	0.0447401
MTIF3	4	0.65252	0.0447401
EIF3I	4	0.68142	0.0447401
PHF5A	4	0.90019	0.0447401
ACTR10	2	1.3572	0.0447401
DOT1L	4	0.62254	0.0449079
SURF6	4	0.8954	0.0449079
U2SURP	4	0.78957	0.045169
LONP1	4	0.49625	0.0457473
FOXM1	4	0.80893	0.0457473
TEFM	3	0.58294	0.0457487
ARHGEF39	4	0.63681	0.0457487
UTP25	3	1.1103	0.0457487
MDH2	3	0.67929	0.0459626
MTBP	3	1.4005	0.0459626
RPL7A	3	0.36951	0.0461531
MRPL55	2	0.64488	0.0461531
MRPS5	4	0.69794	0.0461531
SYMPK	2	1.0154	0.0461531
ENTPD3	3	-0.70449	0.0471611
NSF	4	0.82317	0.0471611
ATP7B	4	-0.71411	0.0472323
PCGF6	4	0.41443	0.0481547
FAM111A	3	-1.2305	0.0490711
TEDC1	3	0.54821	0.0494386
ZNF341	3	0.63233	0.0494386
PET100	3	0.66761	0.0494386
NDUFB11	3	0.7826	0.0494386
KIDINS220	4	0.8144	0.0494524
DNAJC11	3	1.0258	0.0494524
MED8	4	0.77741	0.0501231
NUP88	4	0.33072	0.0516157
RABEP2	4	-0.41452	0.0517802
INTS6	4	0.57822	0.0517802
MRPL37	3	0.61416	0.0532533
NDUFA2	4	0.65146	0.0533567
TMEM120A	3	0.91825	0.053677
CCDC162P	4	-0.59348	0.0537573
RBFA	4	0.46362	0.0537573
PPRC1	3	0.68873	0.0537573
SMC6	4	0.75119	0.0537573
DHFR2	3	0.64276	0.0540179
MRPL35	2	1.0911	0.054703
LRRC24	4	0.5626	0.0550645
MRPL32	3	0.6262	0.0555829
EIF2B3	4	0.65767	0.0560982
MTHFD1	4	0.36093	0.0572593
KCND1	3	0.59499	0.0572593
INTS10	4	1.0278	0.0572593
SF3B1	4	0.75973	0.0574507
SSB	2	0.93773	0.0584716
ELOC	1	1.1999	0.0586062
ZFAT	4	0.51956	0.0595668
MRPL48	3	0.56287	0.0614472
NDUFC1	4	0.53238	0.062234
TRMT12	3	0.64642	0.062234
DCTN4	4	0.73402	0.062234
TERF2	4	0.74602	0.062234
MRPL4	3	0.84851	0.062234
KIF11	4	0.92362	0.062234
NME6	4	0.74881	0.0626069
GMPPB	3	0.73567	0.0626246
MRPL54	4	0.5361	0.0626607
POLD2	3	1.2855	0.0626607
NMT1	4	0.77882	0.0632761
MTG2	3	0.71077	0.0654295
RRM1	2	1.119	0.0670744
RNF126	4	0.60226	0.0673268
MTHFD2	4	0.63506	0.0676262
MRPS6	3	0.762	0.067777
LYRM2	4	0.25422	0.0686631
MRPL9	4	0.45802	0.0686631
ZNF148	4	0.5957	0.0686631
POLR1E	4	0.75714	0.0686631
DPH3	4	0.81042	0.0686631
MRPS34	3	0.9445	0.0687116
COG6	4	0.26101	0.070293
RPS16	4	0.49041	0.070293
KDSR	4	0.59648	0.070293
NSMCE3	3	0.32274	0.0708918
ACAD8	4	0.37985	0.0708918
DHX30	4	0.61752	0.0708918
CDH1	3	0.69192	0.0708918
NOP10	4	0.6363	0.0721623
DIMT1	4	0.91021	0.0722
SNRPG	1	2.0107	0.0726607
MED6	4	0.91862	0.0740553
NDUFAF8	4	0.56647	0.0750819
MRPL49	3	0.8196	0.0750819
ALG2	3	1.1939	0.0750819
PSMB11	4	0.60828	0.0751576
CCDC84	4	0.86885	0.0754175
TMPRSS4	4	0.4597	0.0771755
SDHA	4	0.62271	0.0771755
NKAPD1	4	0.23178	0.0775659
METTL14	4	0.57845	0.0787773
PRIM1	4	0.74768	0.0793435
PSMC2	4	0.62967	0.080771
MTHFD1L	4	0.74948	0.0816475
SEC24C	4	0.50811	0.0819725
F11	3	0.52045	0.0819725
MRPS24	3	0.78585	0.0819725
MRPL33	3	0.96386	0.0819725
ATP6V1B2	3	1.3556	0.0819725
MPI	3	0.59384	0.0826522
UBR4	4	0.44945	0.0829726
BIRC2	4	0.34779	0.0833655
JTB	4	0.54631	0.0833655
RIOK1	4	0.69406	0.0833655
DDX6	4	0.71468	0.0833655
PSMG3	4	0.80281	0.0833655
HSPA9	4	0.62745	0.0836743
PRR36	4	0.46898	0.0839896
SIPA1	4	-0.66402	0.084748
FZD8	4	-0.31753	0.084748
NUF2	3	0.63231	0.084748
SINHCAF	3	0.63894	0.084748
SEPTIN7	3	0.86185	0.084748
SUPT6H	2	1.3484	0.0852721
DIDO1	4	0.69505	0.0853543
ARL16	4	0.38525	0.0856193
AIFM1	4	0.71785	0.0857003
API5	4	0.3171	0.0862168
NDUFS5	4	0.6438	0.0862168
TXNL4B	4	0.8657	0.0865086
NCOA4	4	-0.65843	0.087271
NDUFB2	3	0.59249	0.0887908
CCDC62	3	-0.19967	0.0888564
CENPL	4	0.63912	0.0888564
POTEF	2	0.71541	0.0906572
ATP2B1	4	0.39338	0.0906853
RPL37	3	1.439	0.0907379
NUDC	3	1.5693	0.0907379
RPAP1	1	2.3136	0.0907379
COASY	4	0.61819	0.0909733
TNFRSF25	4	0.32638	0.0922296
ARF6	2	1.3152	0.0922296
MTREX	4	0.54114	0.0923375
NCAPD2	4	0.88146	0.0924449
IMMT	3	0.57688	0.0924681
TLE3	3	0.3455	0.0924764
MTRES1	4	0.46783	0.0924764
NGRN	4	0.36436	0.0925824
MVD	4	0.50036	0.0932815
CCT6A	3	0.99789	0.0932815
MRPL42	4	0.61146	0.0933308
TAMM41	4	0.8013	0.0933308
NDUFB3	4	0.32413	0.093856
FNTA	4	0.63212	0.093856
FNDC10	2	-0.1984	0.0947766
MYBL2	3	0.59022	0.0947766
ALAD	3	0.84897	0.0947938
RPS17	2	1.3428	0.0948551
NDUFS8	4	0.52538	0.0949162
DDX3X	3	0.046858	0.09499
GOLGA6D	1	0.8267	0.09499
AGAP11	1	1.2085	0.09499
TXN	3	1.3788	0.09499
MRPS17	3	0.55001	0.0953629
VKORC1L1	4	0.51018	0.0968906
DHX38	4	0.71691	0.0968906
TSC22D2	4	0.78307	0.0968906
PAK2	3	1.4247	0.0969819
GPR1	4	-0.42973	0.0977976
PCLO	4	0.64158	0.0977976
VAPA	3	0.7706	0.0977976
GLRX5	4	0.40695	0.0989365
RAD1	4	0.58398	0.0989365
NIPBL	3	0.88712	0.0994061
TMEM229B	4	-0.63645	0.0999142
SFPQ	4	1.522	0.0999142
CHIC2	4	0.56994	0.0999364
DDX28	4	0.62767	0.0999364
HSD17B12	3	0.80152	0.0999364
MIGA2	4	0.42936	0.100091
GINS3	4	0.56308	0.100091
SCO1	4	0.69131	0.100091
MRPL1	2	0.87692	0.100091
WNT10A	1	0.98169	0.100091
SNRPA1	1	1.855	0.100091
YY1	3	0.70864	0.100591
ZNF217	3	0.97114	0.100591
PI4KB	4	0.41291	0.100646
CARS1	3	0.42641	0.100646
CHCHD5	4	0.54212	0.100646
CDC6	3	1.1279	0.100646
ACTL6A	4	0.32053	0.103268
ABT1	4	0.74388	0.104297
B4GALT3	3	0.66524	0.104388
SYNE4	4	0.25702	0.104546
CAP1	4	0.44122	0.106189
ITSN2	3	0.56461	0.106255
COPS8	4	0.54833	0.106406
TFB2M	4	0.76222	0.106406
DDX46	4	0.71569	0.106409
CNTNAP1	4	0.77022	0.106409
YPEL5	4	0.45031	0.10644
PNPT1	4	0.64429	0.109271
SDHB	4	0.84155	0.109976
TMEM242	4	0.34039	0.110683
DPH5	4	0.75365	0.110683
DMAC1	3	0.81698	0.110683
FAM98C	4	0.62953	0.111095
NUDT3	2	-0.56255	0.111264
PHF6	4	0.49265	0.111264
TIMMDC1	4	0.49653	0.111264
EXOSC7	3	0.50545	0.112424
PPP2R1A	4	0.56785	0.112424
LAMC3	4	0.3307	0.112648
PFDN2	4	0.69315	0.112648
SNRNP27	4	0.79522	0.112648
HAGH	4	0.61384	0.1156
MRPL43	2	1.0218	0.11589
ACTR2	4	0.56397	0.116467
THOC2	4	0.63324	0.116467
GTF3C2	2	0.82647	0.117063
GAR1	4	0.42909	0.118036
RMI1	4	0.38481	0.118626
RPL14	2	1.9506	0.119284
VPS37A	4	0.6405	0.121697
MS4A1	3	0.44357	0.121758
TPT1	3	0.55171	0.121758
TCP1	3	1.0063	0.121758
NT5C	3	0.6174	0.123392
SLC9A9	2	-0.93906	0.123793
PITRM1	4	-0.55308	0.124552
AARS1	4	0.49863	0.124552
CAND1	4	0.55011	0.124552
NOA1	4	0.66992	0.124552
NOP14	4	1.0765	0.124552
SAMM50	3	1.0942	0.124552
TRAPPC1	3	1.1266	0.124552
HK1	4	0.29068	0.126797
PGK1	4	0.54077	0.126797
TUBGCP3	4	0.60303	0.126797
PREB	4	0.58059	0.12714
ZPR1	4	0.66097	0.12714
GCNA	3	-0.82361	0.128157
MTERF4	2	0.76503	0.128157
DPY30	2	1.2425	0.128157
PFDN4	3	-0.53641	0.128381
FOXRED1	3	0.48856	0.128381
CDC37	2	1.0342	0.128381
TNFRSF10C	4	-0.67634	0.128394
CIAO2A	4	-0.5291	0.128394
NUCB1	4	0.35508	0.128394
PEX14	4	0.3601	0.128394
MRPL11	3	0.40384	0.128394
DHX37	4	0.42449	0.128394
COX10	4	0.45648	0.128394
POLR3K	4	0.48853	0.128394
CWC25	4	0.49024	0.128394
BECN1	4	0.64623	0.128394
GPKOW	4	0.79586	0.128394
PHB	4	0.89831	0.128394
TLCD4	1	1.1332	0.128394
EXOC4	2	1.2718	0.128394
RPE	4	-0.58727	0.128542
TMEM139	3	-0.36166	0.128542
EIF2S1	4	0.63048	0.128542
TRIR	4	0.69047	0.128542
HARS1	3	1.0061	0.128542
MRPL45	2	0.84638	0.128623
KPNA2	3	0.44801	0.128748
MSRB1	3	0.50537	0.128748
COX5A	4	0.36584	0.130876
SERBP1	2	0.85567	0.132178
IER5	4	-0.71596	0.132235
ELAC2	4	0.43894	0.132235
TTI1	4	0.66972	0.132235
FBXL14	4	-0.39013	0.132279
MALSU1	4	0.57429	0.134387
NMD3	4	0.57447	0.134387
NUP93	3	0.72651	0.134387
ZFAND5	3	0.63285	0.134669
ANAPC11	4	0.63027	0.134931
SEPHS1	3	0.65737	0.134931
EXOSC10	4	0.67602	0.135891
CINP	4	0.52668	0.135951
TKT	4	-0.42041	0.136204
ATP5F1D	4	0.4692	0.13639
EEF1A1	1	1.5764	0.13639
SPTLC1	4	0.51061	0.138772
FASTKD2	3	0.57232	0.138772
NOC4L	4	0.64799	0.13886
LEAP2	4	0.54129	0.139314
ZNF586	4	0.30779	0.139701
FBXO11	4	0.62694	0.139701
OR2D2	4	-0.76859	0.13982
ALG1	4	0.68081	0.140773
ACAD10	3	0.85476	0.140773
NAA10	4	0.54857	0.141213
RBM12	4	0.67571	0.141213
NKPD1	2	0.53299	0.141267
AP2M1	4	0.62644	0.141553
NFS1	4	0.87358	0.141553
SLC35E2B	3	0.48068	0.141634
VRK1	4	0.51326	0.141925
CLEC17A	4	0.4246	0.142188
ZNF718	3	0.40956	0.14319
ARID1B	4	0.54353	0.14319
COA8	3	0.59329	0.14319
CTNNBL1	4	0.83341	0.14319
KRTAP17-1	3	-0.51413	0.143825
ZRSR2	4	0.37785	0.144026
BTBD10	2	0.58839	0.144026
PFDN6	4	1.1153	0.144026
TGFBRAP1	4	0.52961	0.14434
CTPS1	4	0.30382	0.144446
GSTO1	4	0.32825	0.144446
KMT2B	4	0.34563	0.144446
TACC3	4	0.43709	0.144446
NFIA	4	0.52276	0.144446
C1QBP	4	0.53634	0.144446
CDAN1	4	0.54555	0.144446
TSFM	4	0.64165	0.144446
NDUFV2	3	0.71642	0.144446
SOX17	3	0.73919	0.144446
RPL18	3	1.3749	0.144446
ATP6V1E1	2	0.94759	0.144605
RBM22	4	0.73625	0.14475
RPS5	3	0.95216	0.14475
ZNF574	4	0.49775	0.146465
GTPBP8	4	0.56866	0.146465
MRPS28	4	0.43363	0.148583
TBRG4	4	0.36856	0.149924
PALB2	3	0.57579	0.153056
SF3B3	4	0.94135	0.153056
HAUS6	4	0.59507	0.153706
PSMD3	3	1.0066	0.15447
BAG5	3	0.31759	0.154526
SLC25A3	4	0.53197	0.155703
WFDC3	3	-0.47213	0.155704
SUPV3L1	2	0.83978	0.155758
STAMBP	3	-0.029323	0.155781
VWCE	3	0.47073	0.155781
RPS11	3	0.91708	0.156424
DEDD2	4	0.36958	0.157979
P2RX7	4	-0.51609	0.158495
CPSF3	3	1.0706	0.158495
SRSF7	4	0.97666	0.16004
GINS2	4	0.66219	0.160842
POLA1	2	0.76769	0.160842
COX20	2	0.86246	0.160842
CA2	4	-0.32792	0.162043
SCYL2	4	-0.2765	0.162043
NODAL	4	0.50068	0.162043
DDX47	3	1.0157	0.16294
CTCF	3	0.68852	0.163772
RTF1	4	0.37609	0.164205
SRRD	4	0.47063	0.164205
CEP128	4	-0.40958	0.164764
GPD1L	4	-0.56582	0.165588
THOC1	3	-0.49066	0.165771
G6PD	3	-0.4247	0.165771
TOMM22	3	0.67704	0.165942
TNRC18	4	0.34869	0.165952
ST6GAL1	4	-0.59378	0.167149
GLOD5	4	-0.38212	0.167439
RING1	3	0.32923	0.167439
SBNO2	4	0.37011	0.167439
ATP6V1G1	3	0.37234	0.167439
ITPK1	4	0.48199	0.167439
RAD51D	3	0.70341	0.167439
RAE1	3	0.77652	0.167439
C2CD4A	2	-0.7107	0.167869
ARVCF	4	-0.65025	0.167869
HCN4	4	0.37818	0.167869
TRAPPC5	3	1.2526	0.167869
GART	4	0.63536	0.168348
DDX41	4	0.58196	0.168643
CCDC90B	4	-0.47913	0.169311
LSM14B	4	0.33719	0.170473
PANK1	3	0.57297	0.170473
PTBP1	4	0.35739	0.171501
KAT2A	4	0.49424	0.171501
UBAP2L	4	0.55468	0.171658
YARS1	4	0.77449	0.172155
CCDC115	4	0.66547	0.172262
YWHAZ	1	-0.72607	0.172547
MGMT	3	-0.56722	0.172803
NAA20	4	0.68169	0.172803
PLEKHG3	4	-0.57797	0.173139
MTPAP	3	0.96725	0.173139
TRIM16L	3	-0.073374	0.173887
MRPL27	4	0.38389	0.174837
UROS	4	0.39463	0.174837
MEIOC	4	0.39494	0.174837
BMP4	4	0.43804	0.174837
MRM3	2	0.54127	0.174837
HIC2	4	0.60642	0.174837
UTP4	4	0.7809	0.174837
MRPL18	3	0.39281	0.174885
URI1	4	0.48931	0.175313
PCIF1	4	-0.27026	0.176506
TTF1	4	0.62418	0.177317
GPR82	4	-0.57916	0.177324
LKAAEAR1	4	-0.53062	0.177324
SPATC1	4	0.28673	0.177324
POLRMT	3	0.81818	0.177324
ADSL	4	0.82137	0.177324
BICRA	4	0.22384	0.177368
NDUFA4	3	0.42524	0.178872
TBCC	4	0.60062	0.179161
ART3	3	-0.9341	0.181
BMF	4	-0.54458	0.181
TDRP	3	-0.51893	0.181
TMEM214	4	0.34565	0.181
STK40	4	0.35914	0.181
ZNF793	4	0.3764	0.181
AARS2	4	0.42348	0.181
SLC7A6OS	4	0.47141	0.181
ARFGEF1	4	0.48932	0.181
EMG1	4	0.50172	0.181
CLP1	4	0.51378	0.181
CSNK2B	4	0.62251	0.181
HEATR1	4	0.63718	0.181
HNRNPM	3	0.77063	0.181
RPL4	4	0.78371	0.181
TBL3	4	0.45393	0.183174
ERRFI1	4	0.35258	0.184668
MS4A15	4	0.41212	0.184668
DMAP1	4	0.53126	0.184668
PDX1	3	-0.49462	0.186043
NSMCE4A	4	0.77257	0.186559
TPX2	4	0.40491	0.186914
UBE2B	4	0.50536	0.186914
KIF9	4	0.52475	0.186914
SPC24	3	0.67767	0.186914
NELFA	3	0.97827	0.186914
MUC6	1	1.3371	0.187936
NDUFS7	4	0.60727	0.187936
RNF20	3	0.55614	0.188058
SERINC1	3	0.030524	0.1883
LIG1	4	0.35738	0.18893
TELO2	4	0.60335	0.18905
CARHSP1	3	-0.46298	0.189913
VPS52	4	0.75778	0.190151
SNRPB	4	0.24485	0.190575
ATXN7L3	4	0.48852	0.190575
COA3	3	0.52123	0.190575
CNOT4	4	0.55677	0.190575
RFC5	3	-0.4409	0.190946
VWA3B	3	-0.43307	0.190946
CCDC59	3	0.69961	0.190946
EIF3A	4	0.83887	0.190946
SSU72	3	0.49801	0.192243
POLR1D	4	0.8067	0.193374
XRCC2	3	0.34159	0.193459
DNM2	4	0.89184	0.194139
ANAPC2	3	0.49743	0.194791
ACAD9	4	0.37256	0.194961
SNF8	4	0.59343	0.194961
YEATS4	4	0.49011	0.195213
GOT2	3	-0.66219	0.195474
SEH1L	3	0.77918	0.195477
C1orf210	3	-0.44328	0.195916
LY96	4	-0.42483	0.195916
IL18	3	0.19692	0.195916
HNF1B	4	0.31338	0.195916
RPRML	4	0.47604	0.195916
MRPL28	3	0.59829	0.195916
RAD23B	4	0.61273	0.195916
MST1L	4	0.66596	0.195916
GPR137C	4	-0.39757	0.196195
ERCC3	4	0.23699	0.196195
CEL	4	0.29329	0.196195
DDX23	4	0.53221	0.196195
HACD2	4	0.63044	0.196195
PRMT7	4	0.29803	0.196713
TERT	2	-0.71494	0.19685
APC	3	-0.48198	0.19685
NUDT10	3	-0.3144	0.19685
SCN4A	4	0.31577	0.19685
PRELID1	4	0.48019	0.19685
IP6K2	4	0.5464	0.19685
GTPBP10	4	0.55512	0.19685
THOC5	4	0.62878	0.19685
NBPF14	2	0.67951	0.19685
GPN2	3	1.3971	0.197742
DOLK	4	1.0193	0.197776
DDX19A	4	0.16637	0.198815
ZNF623	4	0.58579	0.198815
ACRBP	3	-0.57215	0.198963
CCNB1	3	0.28994	0.198963
EMC3	8	0.29478	0.198963
FAM218A	3	0.34116	0.198963
ABCF1	4	0.71714	0.198963
SNRNP200	4	0.85511	0.198963
IL9R	4	0.54435	0.200268
SMNDC1	4	0.52993	0.201346
C11orf80	4	0.48229	0.201957
PEBP1	2	0.56884	0.201957
BRIX1	4	0.97102	0.202163
DIS3	4	1.0444	0.202635
MIS12	4	0.60117	0.205012
PIH1D2	4	0.53466	0.21015
ATP7A	4	-0.3378	0.210918
UBA1	3	0.85752	0.213316
SMIM22	4	-0.47184	0.213563
ACO2	3	0.57122	0.213563
KCNC3	4	0.29136	0.213707
CENPA	2	1.211	0.215367
RASA2	4	0.42824	0.215598
REL	4	-0.5968	0.216217
ALG12	3	-0.42099	0.216217
POP4	3	0.99718	0.216217
ATG9A	4	-0.58633	0.216355
ALDH1A1	4	-0.37871	0.216355
CST7	4	0.043153	0.216355
AAMP	4	0.58763	0.216355
SMU1	4	0.62219	0.216355
NOL6	4	0.67706	0.216355
CENPK	4	0.74893	0.216355
GOLGA6L9	1	1.2305	0.216355
FOPNL	4	-0.35689	0.216459
CCDC74B	3	0.2978	0.216459
FHAD1	3	0.53305	0.216459
TSR1	4	0.70337	0.216459
PLAA	3	0.18762	0.216668
NDUFS4	4	0.57342	0.216668
SUZ12	3	0.4815	0.216975
SCD	4	0.637	0.217508
PRR16	3	0.87531	0.217508
TSEN15	3	0.185	0.219007
UBP1	4	-0.30343	0.220194
SETD4	4	0.56061	0.220194
TOR3A	4	-0.081432	0.221183
EXOC3L4	3	0.64809	0.221183
SMC3	4	0.92365	0.221183
SNRPD3	4	0.99886	0.221183
PAXIP1	4	0.57396	0.22123
GGA1	4	-0.57576	0.221358
TSSK3	4	-0.52123	0.221562
FOXP1	4	-0.46125	0.221562
SIN3B	4	-0.39249	0.221562
TMEM265	4	-0.35387	0.221562
SPINK5	3	-0.16429	0.221562
ITLN1	4	0.16601	0.221562
OXSM	4	0.40346	0.221562
DVL3	3	0.40406	0.221562
PEA15	3	0.42536	0.221562
RABGGTB	3	0.42924	0.221562
SPRED3	4	0.44714	0.221562
DRICH1	2	0.52033	0.221562
KIF26B	3	0.53673	0.221562
CDK2AP1	3	0.63056	0.221562
ATRNL1	4	-0.34106	0.221938
CAPS2	4	-0.34495	0.221973
ZKSCAN8	4	-0.34247	0.221973
G3BP1	4	0.47128	0.221973
FAM92B	4	0.4862	0.221973
PDPR	4	0.57202	0.221973
CENPM	4	0.79969	0.221973
TSPAN13	4	-0.59254	0.222877
ZNF180	4	-0.44917	0.222877
RELCH	4	-0.42675	0.222877
JPH1	3	-0.16653	0.222877
GLTP	4	0.15499	0.222877
MAP3K14	4	0.3685	0.222877
PPOX	4	0.38494	0.222877
CHTOP	4	0.38899	0.222877
ALMS1	3	0.39825	0.222877
COPG1	4	0.41433	0.222877
AP2S1	4	0.42305	0.222877
RPS6KC1	3	0.43402	0.222877
DNTTIP1	4	0.45469	0.222877
PSMD11	4	0.46561	0.222877
UQCRB	3	0.49139	0.222877
FERMT2	4	0.5205	0.222877
CD3EAP	4	0.58527	0.222877
EIF2B1	3	0.59071	0.222877
CENPC	3	0.63215	0.222877
ALYREF	2	0.63911	0.222877
DDX42	4	0.65473	0.222877
HIPK3	3	0.68582	0.222877
DCTN5	4	0.70698	0.222877
RRP12	3	1.5399	0.223279
KRT18	1	-1.2743	0.223458
UTP20	4	0.57695	0.22406
CHRFAM7A	2	0.37885	0.224504
MMADHC	4	0.43796	0.224504
PDK3	3	0.45381	0.224504
RPP40	4	0.46667	0.224504
CRNKL1	4	0.49536	0.224504
PDE6G	3	0.49739	0.224504
MRTO4	4	0.52692	0.224504
MTIF2	3	0.527	0.224504
CDC5L	4	0.70731	0.224504
COX5B	3	0.71303	0.224504
POLR3B	3	0.76704	0.224504
DNAJC9	2	1.2206	0.224504
PABPC4	3	0.47245	0.224993
MRPS26	3	0.4833	0.224993
AHNAK2	3	0.68272	0.224993
ATG2A	3	0.55816	0.22505
XRCC4	4	0.30111	0.225687
SLC29A4	4	0.44467	0.225687
TRMT61A	2	0.5181	0.225687
MBOAT2	2	0.62338	0.225687
ORC3	4	0.82874	0.225687
DMXL2	3	-0.9415	0.226734
DNPH1	4	-0.4827	0.227233
H1-6	3	0.54705	0.227233
METTL5	4	-0.60018	0.227707
RNASEH2C	4	-0.41372	0.227707
SLFN13	4	0.44853	0.227707
FKBPL	4	0.045136	0.228453
OSR1	4	0.4889	0.228453
MRPL38	4	0.6178	0.228453
PPA1	4	0.805	0.228453
RANGAP1	4	0.91238	0.228453
FAM193A	4	-0.43204	0.229163
KCTD20	4	-0.43789	0.229907
DDX52	4	0.40065	0.23182
TFE3	3	-0.46258	0.232292
ABCA5	3	-0.89635	0.233592
POLR2E	3	-0.43665	0.233592
TREML1	4	-0.51677	0.234405
IP6K1	4	0.4865	0.235334
FBL	4	0.79251	0.235334
OR2AE1	4	0.35123	0.235956
HIGD2A	4	0.46203	0.235956
SEPHS2	4	0.25923	0.236016
SEMA6B	3	0.19408	0.236027
PROZ	2	0.67135	0.236027
LPL	4	-0.68666	0.236412
SLC30A1	1	-1.0645	0.236756
FAR2	3	-0.43225	0.236763
C6orf89	4	-0.57729	0.236971
PDE8B	4	-0.31977	0.236971
INPP4B	4	-0.2551	0.236971
NIPSNAP3B	4	0.04555	0.236971
EIF4EBP2	4	0.213	0.236971
LAMTOR1	4	0.33566	0.236971
LSM5	4	0.48089	0.236971
DR1	4	0.48683	0.236971
COPA	3	0.5244	0.236971
UGT1A10	4	0.52749	0.236971
RARS2	4	0.53567	0.236971
ALDOA	4	0.58576	0.236971
RBBP8	4	0.60479	0.236971
ATP5ME	2	0.60691	0.236971
TMEM31	2	-0.87713	0.237347
YBEY	3	0.23803	0.237688
DAD1	2	1.3468	0.240773
ATL3	4	-0.35031	0.241644
CYB5R4	4	-0.54287	0.242327
OBSL1	3	-0.43796	0.242327
MRPS36	3	-0.71418	0.243732
SEC24D	4	-0.45432	0.245107
UGGT1	4	0.15898	0.245107
EIF4E	2	0.65484	0.246883
UQCRQ	3	0.72674	0.246883
BTN3A3	4	-0.34632	0.246934
RPS7	2	0.86652	0.248342
METTL16	3	0.75008	0.248738
LSM11	4	0.54038	0.249389
PRPF38A	4	0.44635	0.249599
H2BC21	1	-1.4818	0.250285
MFSD8	4	0.35629	0.250328
FSTL4	2	0.78314	0.254646
TCEAL4	4	0.26158	0.254871
ZNF74	4	0.42275	0.254871
BTNL9	4	0.29638	0.255555
PTPN23	4	0.5422	0.255555
SRP72	4	0.57058	0.255555
PTPN11	1	1.0417	0.255555
TMEM208	4	-0.73139	0.255797
DDAH2	4	-0.53028	0.255797
KCNJ11	4	-0.51569	0.255797
MYOM3	4	-0.43303	0.255797
FANCF	3	0.37624	0.255797
CENPJ	4	0.46315	0.255797
NXT1	4	0.48554	0.255797
ARL10	4	0.51772	0.255797
TEDC2	2	0.56327	0.255797
GOSR1	2	0.70763	0.255797
SAP30BP	3	1.0402	0.255797
TMEM131L	3	-0.49229	0.257753
UQCR11	3	0.42333	0.258449
RBBP4	3	0.51023	0.258449
NUMA1	3	0.81979	0.258449
SH3PXD2A	4	-0.34946	0.259751
MAP6	4	-0.40178	0.261719
BCKDK	4	-0.6111	0.262528
CCL26	4	0.31783	0.262528
SCAF8	3	0.37424	0.262528
SRSF1	4	0.59998	0.262528
MIEF1	3	0.44014	0.262629
MED18	4	0.49235	0.26315
NOP16	4	0.57256	0.26315
SAMD8	4	0.46654	0.264278
TNFRSF13B	3	-0.46813	0.265928
SCIN	4	-0.47711	0.265973
EXOSC2	3	0.45714	0.266794
MRPL10	3	0.35177	0.267672
GPR62	3	0.52298	0.267672
BCORL1	4	-0.33366	0.268752
SLK	3	-0.46535	0.269058
PRUNE1	4	0.16762	0.270763
MTERF3	4	0.40786	0.271047
TMEM126A	4	0.34459	0.271174
CTRC	2	0.62808	0.272577
TRIT1	3	0.4381	0.272592
CDC73	3	0.56488	0.272592
ERLIN1	2	0.65194	0.272592
SF3B5	3	0.67826	0.272592
B4GALT5	2	0.86057	0.272592
ALG11	3	0.90583	0.272592
TUBB	3	0.57875	0.274016
ARMC7	4	0.64666	0.275179
MEOX1	3	0.32631	0.276252
ELP5	4	0.080564	0.276511
CDS2	3	0.090201	0.276511
OSBPL3	3	0.60517	0.276511
USF3	2	0.57971	0.276836
TPK1	4	0.32507	0.277489
METTL7A	4	0.36402	0.278198
ZDHHC19	4	0.37775	0.278198
DIS3L2	3	0.44391	0.278198
PGS1	3	0.4612	0.278198
HNRNPL	4	0.32731	0.278687
RPL35	4	0.39925	0.278687
CACNB1	4	0.49489	0.278687
MAPK13	4	-0.43554	0.279283
SIRPG	4	-0.43815	0.27938
TAF9	3	-0.43471	0.27938
C12orf4	4	-0.40258	0.27938
UBR1	4	-0.080226	0.27938
TUBA1C	3	0.66151	0.27938
UBE2M	2	0.91348	0.280922
CRCP	3	0.64706	0.282189
RPS3	3	0.068851	0.282217
KCNV1	4	-0.25754	0.283971
UFSP2	4	-0.48072	0.284512
GRHL1	4	-0.27557	0.284512
DCT	4	-0.29189	0.284521
SLC23A2	4	-0.62878	0.284854
POLR3GL	4	-0.45996	0.284854
RBM18	3	0.63673	0.284854
SUPT5H	3	0.66119	0.284854
MICALL1	4	-0.56613	0.286071
RNF146	4	-0.46694	0.286386
HNRNPC	3	0.69675	0.286386
EEPD1	4	-0.3492	0.287078
PRPF19	3	0.79966	0.287619
MAT2B	3	-0.47355	0.28784
RPN2	3	0.73985	0.288699
TMEM67	3	0.35678	0.289737
EIF4B	1	-0.8245	0.292875
IL17RE	4	0.046114	0.292953
INSIG2	4	0.25637	0.292953
RIC8A	3	0.36877	0.292953
MRPL19	4	0.38369	0.292953
TGIF1	3	0.61836	0.292953
CCNH	3	0.8799	0.292953
NDOR1	2	1.1864	0.292953
PSMC6	4	0.62444	0.293599
CTNS	4	0.41199	0.293661
NDUFAF7	4	0.42963	0.293661
PPWD1	4	0.46396	0.293661
TBCE	4	0.69667	0.293661
LSM10	4	0.31812	0.293723
MAD2L1BP	4	0.55184	0.293723
TERF1	4	0.23791	0.293863
PLK4	4	0.24281	0.293863
COPZ2	4	0.29917	0.293863
GOSR2	4	0.54608	0.293863
CWC15	4	0.59085	0.293863
PSMB4	4	0.84723	0.293863
SLC26A7	4	-0.43117	0.295806
CAVIN4	4	-0.43143	0.296938
GPIHBP1	4	-0.49642	0.297351
TMEM79	3	0.33127	0.297932
VAMP8	4	-0.40446	0.298128
MAGIX	4	-0.39998	0.298128
TP53I3	3	0.71355	0.298128
LYRM1	4	-0.37303	0.298836
TLCD1	4	0.63512	0.298861
SGPL1	3	0.29898	0.299847
GALNT9	3	0.33225	0.299847
WDR33	4	0.36674	0.299847
FAM219B	3	0.3769	0.299847
STC2	3	0.46806	0.299847
BUB1B	3	0.4833	0.299847
AQR	4	0.49096	0.299847
GBA	3	0.49224	0.299847
EIF3E	4	0.5166	0.299847
MPP2	3	0.55279	0.299847
INTS8	3	0.59699	0.299847
CYP4B1	3	-0.3892	0.300044
UFL1	4	-0.59738	0.300187
TMEM30B	4	-0.31267	0.300187
CCKAR	4	-0.26789	0.300187
IRX5	3	-0.096112	0.300324
DNASE1	4	0.13543	0.301231
CENPQ	4	-0.43774	0.302315
MTUS1	4	-0.34461	0.302419
HES6	4	0.25497	0.302717
RAD18	4	0.29098	0.302717
TAF1D	4	0.53043	0.30288
NDUFAF5	4	0.37929	0.303986
CPED1	4	0.4631	0.306416
FKBP3	4	-0.40318	0.307403
P2RY1	4	0.29203	0.307403
CFL1	4	0.33398	0.307403
HAUS4	4	0.61725	0.307403
IL36G	3	0.33752	0.307572
CLSTN2	4	0.35369	0.307572
FECH	4	0.4417	0.308091
RTTN	4	0.49417	0.308091
NHP2	4	0.26648	0.30818
MTCH2	4	0.42513	0.30818
EXOSC8	4	0.56157	0.30818
DHX9	3	0.84193	0.308715
NEK9	4	0.24614	0.310002
CNOT2	3	0.35307	0.310002
CCT8	4	0.43782	0.310002
ACTR5	3	0.44083	0.310002
HS2ST1	4	-0.4978	0.312157
INTS1	3	0.56016	0.313091
MTX1	3	0.38921	0.313473
ULBP2	2	0.41825	0.314144
ARFGEF3	4	0.17086	0.315507
PITHD1	4	-0.20862	0.31555
USPL1	4	0.16252	0.31555
PVRIG	4	0.24007	0.31555
NAT10	4	0.41202	0.31555
CDK13	3	-0.51473	0.316642
C6orf201	4	-0.48267	0.316642
PORCN	4	-0.47359	0.316642
LRRIQ4	4	-0.46361	0.316642
SNAP47	4	-0.34676	0.316642
ABRAXAS1	4	0.22619	0.316642
ALG10	4	0.34556	0.316642
CCNYL1	4	0.37812	0.316642
SMARCA2	4	0.38954	0.316642
PEX5	4	0.48013	0.316642
PRIM2	4	0.68749	0.316642
ZC3H15	2	0.42213	0.317331
POLR2L	4	0.64619	0.317331
LMNA	2	0.77383	0.317448
USP24	1	0.92882	0.317448
TGFB1	3	-0.58775	0.317819
DLEC1	4	0.4503	0.318643
MASP2	4	-0.50157	0.318929
NEK4	4	-0.27791	0.318929
OSBPL6	4	0.093643	0.318929
NFU1	4	0.31536	0.318929
ARPC1B	3	0.34539	0.318929
HIGD1A	3	0.37251	0.318929
E4F1	3	0.43986	0.318929
HMGA1	2	0.71969	0.318929
FH	4	0.57745	0.319211
CNBD2	4	0.47715	0.31938
CRLS1	3	0.57179	0.319464
MARCHF6	1	-0.73488	0.319547
MMUT	3	-0.47054	0.319547
MX2	3	-0.40513	0.319547
ENPP3	4	-0.31422	0.319547
FGFR3	4	-0.30011	0.319547
NCOA7	4	-0.079917	0.319547
POLR3C	3	0.14518	0.319547
GGN	4	0.38417	0.319547
CDK2AP2	3	0.42247	0.319547
SPICE1	4	0.45712	0.319547
DKC1	4	0.59927	0.319547
DST	3	0.64091	0.319547
SURF1	3	0.65538	0.319547
UBD	4	-0.43881	0.320101
AHRR	4	-0.43041	0.321759
FAM107B	4	-0.39926	0.321759
RAD21	4	-0.35856	0.321759
PSEN2	4	-0.31901	0.321759
SRXN1	4	-0.28577	0.321759
CPPED1	4	-0.21087	0.321759
EEF1G	3	0.23868	0.321759
VIPR2	4	0.3338	0.321759
KLHL35	4	0.34032	0.321759
ZNF783	3	0.37269	0.321759
ECRG4	3	0.39173	0.321759
SFRP4	4	0.41802	0.321759
NR3C1	2	0.46967	0.321759
RPP25L	4	0.61167	0.321759
GSTCD	3	0.61539	0.321759
GFM2	3	0.69056	0.321759
RPL31	2	0.73905	0.321759
SMOC2	4	-0.36738	0.322547
LOC389602	4	-0.047887	0.322547
EIF3L	4	-0.0026501	0.322547
MDN1	3	0.025986	0.322547
C19orf53	3	0.16714	0.322547
HLTF	3	0.29295	0.322547
KLK11	4	0.427	0.322547
PSMC5	4	0.44445	0.322547
NDUFA10	3	0.60159	0.322547
PRMT5	4	0.6494	0.322547
AKIRIN2	2	1.1322	0.322547
CCDC130	1	1.2293	0.322547
PTGR2	3	-0.46215	0.323541
FCRLB	3	-0.097902	0.323541
KCNQ5	3	-0.58005	0.324204
H4C5	3	-0.52085	0.324204
WNT7A	4	0.12889	0.324204
CBARP	4	0.28705	0.324273
ATP6V0D1	3	0.4455	0.324273
NOC2L	4	0.59034	0.324273
NYAP1	4	0.50234	0.324349
RBX1	3	0.53968	0.324989
VARS	3	1.1604	0.325038
ITPRIP	4	-0.26892	0.325789
PLK1	4	0.63523	0.325789
EIF6	4	0.77944	0.325789
ELP4	3	0.8297	0.325789
NSA2	2	0.84541	0.325789
IGSF23	2	-0.54398	0.326605
SMO	2	0.46585	0.326605
OR2A42	1	-0.43685	0.328353
DGAT1	4	0.35036	0.328353
NSUN4	4	0.43912	0.328353
RFC2	4	0.50773	0.328353
H2BU1	3	0.67277	0.328353
PLOD2	4	-0.46671	0.328699
C12orf80	3	-0.45211	0.328699
MAPK4	4	-0.4031	0.328699
KLHL6	4	-0.37438	0.328699
TTC9	4	-0.35608	0.328699
ZNF776	3	-0.18715	0.328699
TEX9	4	-0.015441	0.328699
TEX14	4	0.18498	0.328699
MED13L	4	0.29886	0.328699
ZNF837	4	0.31945	0.328699
EVI5	4	0.36363	0.328699
ECHS1	4	0.36618	0.328699
GEMIN8	4	0.40225	0.328699
ITPRIPL1	4	0.41742	0.328699
C14orf132	4	0.44326	0.328699
ARCN1	4	0.45486	0.328699
EP400	4	0.46733	0.328699
PSMD7	3	0.50616	0.328699
PRPF4B	4	0.53154	0.328699
USP7	4	0.55016	0.328699
PSMA2	4	0.55715	0.328699
EIF4G2	2	0.59742	0.328699
BOLA3	1	0.88022	0.328699
RPAP2	1	1.204	0.328699
ZNRF2	2	0.64536	0.329237
RNF217	4	-0.30352	0.331688
DCAKD	4	0.34845	0.331688
PRSS8	4	-0.21873	0.33256
OTUB2	4	-0.31402	0.332627
RTL8C	4	-0.4314	0.334378
UHMK1	2	-0.63051	0.33465
GRK5	4	-0.25898	0.335853
SIRPD	4	-0.40818	0.340414
SPATA9	3	-0.60521	0.34081
TCTE1	4	0.2943	0.34117
CHRNG	3	0.44458	0.34117
IMPDH2	2	0.58584	0.34117
XRCC6	3	0.74478	0.34123
KIF3C	4	0.29559	0.341752
NUTF2	3	0.038285	0.341965
MAFK	3	0.33085	0.342624
ADAT3	3	0.46505	0.342624
MICOS10	4	0.49558	0.342624
DAZAP2	3	0.57001	0.342624
LRRFIP2	3	0.57508	0.342624
FRRS1	3	0.66486	0.342624
TMEM176B	3	0.35648	0.342677
TADA3	4	0.42911	0.342677
STOML2	2	0.51465	0.342677
GOLGA4	3	0.61827	0.342677
CLSPN	3	0.39174	0.342971
EIF2S3	4	0.66791	0.342971
IGLL5	2	-0.29106	0.346139
NMI	4	0.34631	0.346139
KRT16	4	0.37717	0.346139
NDRG2	3	-0.45927	0.347386
CLASP2	2	0.26605	0.349951
ZDHHC8	3	0.40094	0.349951
CPNE3	3	0.44362	0.349951
LAMTOR4	3	0.71693	0.350635
FAM234A	4	-0.37847	0.353472
ELOVL5	4	-0.35124	0.353472
PPID	4	-0.32901	0.353472
AP1G2	4	-0.32295	0.353472
KCNQ2	4	-0.23921	0.353472
FANCA	3	0.22947	0.353472
SLC35D2	2	0.35509	0.353472
MYBBP1A	4	0.43994	0.353472
MVK	4	0.45467	0.353472
SF1	4	0.4985	0.353472
RHPN1	2	0.53102	0.353472
ACTR1A	4	0.64172	0.353472
PFKFB1	4	-0.24803	0.353917
EME1	4	0.23506	0.353917
CKS1B	2	0.44388	0.353917
LIN9	4	0.46767	0.354914
FARSA	4	0.42545	0.355485
PSMC3	4	0.32655	0.35608
STARD10	3	-1.1183	0.356599
SPATA24	3	-0.25028	0.357641
FUT4	3	-0.54342	0.359222
FLOT1	3	-0.14299	0.359222
ITGA7	4	0.15372	0.360159
SLC25A28	3	-0.56285	0.361344
PER2	4	0.32455	0.361593
CLVS1	4	0.40957	0.361593
C4A	1	1.0602	0.361593
MAPK6	3	-0.41115	0.362642
FAM210B	4	-0.36149	0.362642
RUNX2	4	-0.34516	0.362642
BTN3A1	4	-0.32083	0.362642
MYO3A	4	-0.26126	0.362642
TMEM253	3	-0.041649	0.362642
KNTC1	4	0.060583	0.362642
SWAP70	4	0.19674	0.362642
SCAMP3	3	0.4122	0.362642
YIF1A	4	0.46483	0.362642
FOXD4L1	2	0.52103	0.362642
ZNF566	3	0.62831	0.362642
IMP3	4	0.76402	0.362642
MED13	4	-0.76533	0.36327
ANXA10	4	-0.47577	0.36327
ZSCAN5B	4	-0.4388	0.36327
ZNF396	4	-0.41248	0.36327
RWDD1	4	-0.19335	0.36327
VANGL1	3	0.21177	0.36327
FBXL5	3	0.311	0.36327
REEP3	4	0.35957	0.36327
ANAPC5	4	0.57522	0.36327
HINT1	4	-0.65498	0.363277
PYROXD1	4	0.42347	0.363277
GJB2	4	-0.37808	0.363719
FIGN	3	0.5514	0.363719
UBE2J2	4	0.029788	0.364535
TMEM270	3	0.12282	0.366463
H2BC4	2	0.59069	0.367662
TXN2	3	0.48812	0.367771
ERO1A	3	-0.55728	0.36795
GTF2F1	4	0.050192	0.36795
ZRANB3	4	0.20563	0.36795
OLFM1	4	0.36602	0.36795
UPF1	3	0.84956	0.36795
NR2C2AP	3	0.6382	0.368226
ZNF202	3	-1.093	0.370837
CTTNBP2NL	4	0.2614	0.372698
SEC16A	3	0.38745	0.373163
TMEM182	3	0.55097	0.375259
WDR36	3	0.52504	0.375337
AKT1	4	-0.26697	0.37659
RAB6A	4	0.041211	0.376663
TMEM94	4	0.065626	0.376663
RAN	4	0.41253	0.376663
TSPAN31	4	0.45957	0.376663
RPA3	4	0.79229	0.376663
RND2	4	0.1668	0.377973
MTX2	4	0.34329	0.377973
AVPR1B	4	0.37674	0.377973
VPS25	3	0.53893	0.377973
EXOC2	4	0.54905	0.377973
INTS3	3	0.7381	0.379118
RRM2B	2	0.36143	0.38145
UQCC3	2	0.64391	0.381831
CCDC144A	2	-0.48532	0.381911
ECSIT	3	0.33073	0.381911
DNAH3	3	0.54983	0.381911
CXCL1	3	0.61637	0.381911
LSM12	3	0.63318	0.381911
ZBTB17	3	0.71252	0.381911
PEX16	3	0.75544	0.381911
TMSB4X	1	0.84615	0.381911
PRR5-ARHGAP8	1	0.9293	0.381911
TMEM62	4	-0.37135	0.382785
H3-5	2	0.42664	0.384551
SLC2A11	3	-0.6283	0.384598
WDR63	3	0.052389	0.384947
RHPN2	4	0.42981	0.384947
SKA2	2	0.57875	0.384947
EDA2R	4	-0.37618	0.385227
OTUD4	3	-0.48991	0.385407
KCNMB3	4	0.33943	0.385407
SIKE1	4	0.44141	0.385407
SNRNP70	4	0.49663	0.385407
PFDN5	4	0.63435	0.385407
SLC19A1	3	0.47244	0.385686
LYPLAL1	4	-0.26195	0.386172
POLE	4	0.31347	0.386172
PLAAT3	1	0.74504	0.38666
TAF5	4	0.69939	0.388241
ABCB6	4	-0.48685	0.388332
SOBP	4	-0.30191	0.388332
SSPO	4	-0.29388	0.388332
THUMPD3	3	0.29549	0.388332
RBM33	3	0.33581	0.388332
ISCA1	2	0.4021	0.388332
MRPL22	3	0.4668	0.388332
PSMA5	4	0.62259	0.388884
ZNHIT2	1	1.3645	0.38962
MED30	3	0.48815	0.390657
DMAC2	1	0.54421	0.392223
UCN2	4	0.36488	0.392648
CANX	3	0.46659	0.392648
TMEM255B	3	0.033532	0.393218
CENPI	3	0.54452	0.393925
MIS18A	3	0.21114	0.394255
PRXL2C	3	0.55441	0.394255
CACFD1	3	0.43253	0.394385
SRPX2	4	-0.023654	0.394722
OCIAD1	3	0.23695	0.395035
RNF40	3	0.27383	0.395115
APOA2	4	0.33172	0.395115
UBL5	4	0.54094	0.395115
YKT6	4	0.61714	0.395115
GABRA3	3	-0.055213	0.395336
MKX	3	-0.91205	0.395661
GPATCH4	4	0.37232	0.395661
ZNF22	2	0.41151	0.396223
GPSM2	3	0.32541	0.396706
TAF1A	3	0.86803	0.396706
SDAD1	3	0.75467	0.397087
FGF22	1	0.81028	0.397087
NLE1	3	1.0633	0.397087
B3GNT7	4	-0.27723	0.397236
PRAME	3	-0.17719	0.397544
COQ8B	3	-0.3824	0.398442
ZBTB14	3	0.42355	0.400268
SLC25A37	4	-0.48867	0.40038
STAB2	4	-0.36369	0.40038
HLA-DOB	2	-0.62569	0.4004
FBXL4	2	-0.60098	0.4004
PCBP2	4	-0.52925	0.4004
FEM1C	4	0.066811	0.4004
SMCO4	3	0.19321	0.4004
RNF214	4	0.28289	0.4004
TRIM28	4	0.30054	0.4004
NAA25	3	0.30353	0.4004
ATP5F1A	4	0.37465	0.4004
POLDIP2	4	0.37689	0.4004
YRDC	4	0.45362	0.4004
RIOK3	4	0.46062	0.4004
COX6C	4	0.48076	0.4004
PDSS2	3	0.49395	0.4004
BOP1	4	0.55633	0.4004
KAT5	3	0.79879	0.4004
ATP5MPL	1	0.90922	0.4004
ATMIN	4	-0.45819	0.401688
SLC33A1	4	-0.24274	0.401688
MMAB	4	-0.22779	0.401688
GNAQ	4	-0.15251	0.401688
XKR4	3	0.16176	0.401688
KCNJ8	4	0.29563	0.401688
CFAP47	4	-0.46457	0.401751
LRIG3	4	-0.35102	0.401751
NT5E	3	-0.63017	0.403234
EEF1AKMT3	4	-0.5036	0.403234
NMBR	4	-0.41852	0.403234
ZNF717	3	-0.3954	0.403234
GUCY1B1	4	0.038313	0.403234
C1QTNF12	4	0.19556	0.403234
COQ3	3	0.21939	0.403234
KLF1	4	0.26327	0.403234
FNBP4	4	0.27971	0.403234
MXD1	4	0.28111	0.403234
KCNJ1	3	0.3527	0.403234
SON	4	0.35587	0.403234
TUFM	4	0.38603	0.403234
SMAD9	4	0.39135	0.403234
TRAPPC8	3	0.40657	0.403234
SH3BP1	2	0.42928	0.403234
DVL1	4	0.4434	0.403234
PATJ	4	0.44379	0.403234
DDHD1	4	0.49051	0.403234
HMGCS1	4	0.54134	0.403234
ATP1A1	4	0.58091	0.403234
MPC2	1	0.67159	0.403234
RPP38	3	0.82571	0.403234
PTPRA	4	0.4597	0.405081
ACSL3	4	0.22603	0.405241
HGH1	3	-0.011331	0.405881
ECT2	3	0.61959	0.406478
MARCO	3	-0.37959	0.407646
ASPH	4	0.12413	0.407646
UGT1A5	4	0.065786	0.408201
LSM14A	4	0.34674	0.408201
SNX4	4	0.29372	0.408445
SBDS	4	0.28479	0.409958
PLEKHG6	3	0.41945	0.409958
SRCAP	3	0.67675	0.409958
FAM155B	3	-0.64018	0.411148
F5	3	-0.638	0.411148
OTUD7B	3	-0.59785	0.411148
SIM1	4	-0.58496	0.411148
ZFP37	4	-0.55032	0.411148
DSEL	3	-0.50135	0.411148
COIL	4	-0.44099	0.411148
SMIM24	3	-0.35659	0.411148
CPQ	4	-0.043412	0.411148
RBP2	3	0.39008	0.411148
ARL4D	3	0.42363	0.411148
SUN1	2	0.67883	0.411148
RFC3	4	0.7273	0.411148
COPE	3	0.86526	0.411148
KIF12	3	-0.57662	0.41117
FAM104B	4	-0.24892	0.41117
PLEC	3	0.18688	0.41117
RPUSD2	3	0.38959	0.41117
PON1	3	0.46487	0.41117
RBM8A	3	0.74671	0.41117
STRIP1	3	0.77728	0.41117
ZNF492	1	1.1836	0.41117
TCN1	4	-0.54264	0.411878
CAD	3	0.63652	0.412329
TLDC2	4	-0.33917	0.412397
TBPL2	4	-0.24922	0.412397
ESM1	4	-0.3515	0.413679
TBL1XR1	3	-0.67291	0.414576
DHPS	4	0.72998	0.414576
MAP3K20	2	-0.48971	0.414684
ARGLU1	4	-0.021773	0.414684
THAP11	4	0.33138	0.414684
LIMS1	2	0.37373	0.414684
KIAA0100	4	0.64878	0.414684
KRR1	4	0.30408	0.415343
LIPC	3	-0.57752	0.4167
SLC7A11	4	0.073024	0.417059
COL16A1	3	-0.35772	0.417333
KIFAP3	4	0.18828	0.419279
MSANTD4	2	-0.56139	0.419334
HPX	4	-0.35529	0.419334
ARHGEF4	3	-0.23911	0.419334
HSBP1L1	3	0.038938	0.419352
NEUROD1	4	-0.025975	0.421037
CCDC153	4	0.23943	0.421052
MIER2	4	0.28957	0.421052
ZCCHC14	3	0.40474	0.421052
TNPO1	3	0.51931	0.421052
FARSB	4	0.57014	0.421052
SLC3A2	3	0.73731	0.421052
MRPL20	3	0.83065	0.421052
NCOR1	3	-0.57899	0.421453
MAGI3	3	-0.37112	0.421453
SAT2	4	0.14461	0.421453
RNMT	3	0.1755	0.421453
METTL22	4	0.18219	0.421453
MICALL2	4	0.20286	0.421453
UAP1	4	0.34285	0.421453
CTXN1	3	0.34341	0.421453
OAZ3	3	0.40853	0.421453
APP	4	0.40883	0.421453
PTPN7	3	0.42055	0.421453
TAF5L	3	0.44094	0.421453
PYURF	3	0.45959	0.421453
C12orf45	4	0.48593	0.421453
STIL	4	0.53123	0.421453
C1QTNF9B	1	0.56379	0.421453
CABP1	3	0.57583	0.421453
DNAJC25	3	0.59377	0.421453
WDR18	4	0.63117	0.421453
IL6	1	0.67092	0.421453
CNOT6L	4	0.027543	0.422289
MYH9	4	0.2989	0.422289
NUP85	4	0.58375	0.422289
C16orf90	4	0.28054	0.422843
ATP5PO	4	-0.21969	0.422982
HTR6	4	0.38958	0.423142
GPT	2	-0.74126	0.423966
MMP28	2	-0.65854	0.423966
C17orf102	4	-0.1884	0.423966
DNAJC2	4	0.63923	0.423966
KCNG3	3	-0.48776	0.42713
TICRR	4	-0.20747	0.427155
KIF18A	4	0.52857	0.427155
DOC2A	4	0.29552	0.42716
IVNS1ABP	4	0.33809	0.42716
RNF39	1	-0.76667	0.427214
AMT	3	0.086904	0.427289
AP2B1	3	-0.74994	0.428026
AP2A2	3	-0.45626	0.428026
MBTPS2	4	0.16484	0.428026
NOD2	4	0.2515	0.428026
MRPL47	4	0.30379	0.428026
BRIP1	4	0.49544	0.428092
NHLRC2	4	0.56289	0.428092
TSC22D1	4	0.23612	0.428128
COPS3	4	0.27113	0.428128
LSM2	4	0.60812	0.428128
WDR26	4	0.50101	0.428364
ANXA9	3	-0.064836	0.429007
POTEA	4	-0.43575	0.431792
TMEM14EP	4	0.29146	0.431792
RCC2	4	0.29442	0.431792
NELFCD	4	0.57722	0.431792
USP20	4	-0.54892	0.431972
TSSK6	2	-0.40461	0.431972
MKI67	4	0.061087	0.431972
ITGA6	4	0.36631	0.431972
GTPBP3	4	0.3759	0.431972
TMEM240	4	0.39313	0.431972
SPP1	4	-0.34492	0.43202
COL12A1	3	-0.12276	0.43202
EMC7	3	0.71749	0.43202
AKR1B1	3	0.51916	0.43212
NPTX2	3	0.5901	0.43212
RNF113A	4	0.54734	0.432461
GEMIN6	3	0.73303	0.432461
GUK1	2	0.99381	0.433375
PSMD14	4	0.45922	0.433826
ITGAV	4	0.17037	0.434325
HEATR6	4	0.20786	0.434325
TBCCD1	4	0.28188	0.434472
DRG2	4	0.29234	0.434472
TUT7	4	0.35319	0.434472
STK33	2	0.42232	0.434472
NDUFAB1	2	0.46463	0.434472
SMIM6	2	0.47337	0.434472
HMGXB4	3	0.4942	0.434472
EIF3K	3	0.52962	0.434472
UBA3	4	0.58939	0.434472
GET4	3	0.77903	0.434472
BUB1	2	1.111	0.434472
CITED1	3	-0.72814	0.434865
AP3S1	3	-0.54783	0.434865
FBXL21P	2	-0.089934	0.434865
ABCC6	4	-0.002628	0.434865
ANO9	4	0.29647	0.434865
MRPL46	4	0.30824	0.434865
SP140	4	0.47029	0.434865
AMER1	2	-0.54709	0.438369
TIMM10	4	0.14829	0.438369
WASL	4	-0.29627	0.438994
FBXW9	4	0.30941	0.438994
RFK	4	0.34473	0.438994
RAB33B	4	0.37388	0.438994
YME1L1	4	0.37923	0.438994
FAT3	2	0.43811	0.438994
B4GALNT2	4	0.35161	0.439177
LRP5L	3	-0.047545	0.439497
TMEM126B	3	0.42084	0.439497
NOL8	3	0.44647	0.439497
PAFAH1B3	3	0.49371	0.439497
PNISR	3	0.72655	0.439497
LRTOMT	3	0.66767	0.439914
ZNF529	4	-0.40228	0.440532
TIMELESS	3	0.22385	0.440532
DCLRE1C	3	-0.51736	0.440842
IFI27L1	4	-0.32555	0.440842
PROX1	4	-0.1957	0.440842
EXOC8	3	0.64772	0.440842
ZNF317	4	-0.56598	0.441551
WNT10B	2	-0.63749	0.441552
TMEM61	3	-0.3282	0.441552
ZWINT	3	0.24865	0.441552
IRF8	3	0.38862	0.441552
OGFOD3	4	0.5063	0.441552
DNMBP	3	0.52533	0.441552
PTBP3	4	-0.02016	0.441641
MRPS10	3	0.16193	0.441641
RER1	4	0.2321	0.441641
TRIAP1	3	0.2682	0.441641
DENND3	4	0.28975	0.441641
IRF3	4	0.29632	0.441641
FIGNL1	4	0.36374	0.441641
CLTCL1	2	0.42254	0.441641
GLE1	3	0.74834	0.441641
TBC1D26	3	-0.54892	0.441644
CRIP2	3	-0.38623	0.441648
UBE2J1	4	-0.54143	0.442211
THAP9	4	-0.46314	0.442211
MESP2	4	-0.1056	0.442211
PATE4	4	-0.052688	0.442211
ABHD8	3	0.40012	0.442211
IFI35	3	0.49896	0.442211
SAE1	4	0.54131	0.442211
PLIN4	4	0.27528	0.442217
PAFAH1B1	4	0.70625	0.442217
SLBP	4	-0.66198	0.442627
CHMP5	4	0.30101	0.442627
DCTN2	4	0.45273	0.442707
RAB32	3	-0.72896	0.442847
KLK5	4	0.0664	0.442847
WDR91	4	-0.49762	0.443379
SH2D3C	3	-0.34987	0.443379
CD52	4	-0.32324	0.443379
ZNF514	4	0.23091	0.443379
CEMP1	3	0.35092	0.443379
COQ5	3	0.55942	0.443379
MICAL2	1	-0.85762	0.443594
LBH	4	-0.43286	0.443594
ZNF800	4	-0.41305	0.443594
TEX48	4	-0.39269	0.443594
ATG101	4	-0.31584	0.443594
TTC25	4	0.31052	0.443594
ZNF669	4	0.31626	0.443594
BUD23	4	0.39433	0.443594
EIF4A3	2	0.52326	0.443594
C15orf62	3	0.68298	0.443594
GTF3A	3	0.82035	0.443594
SYT2	4	-0.47953	0.443705
PSEN1	4	-0.13725	0.443705
NMNAT1	3	0.032111	0.443705
RFT1	3	0.043864	0.443705
ERAL1	3	0.19227	0.443705
ATP5MC3	3	0.31951	0.443705
TMEM225B	3	0.32975	0.443705
FAM3D	4	0.39279	0.443705
MDH1	4	-0.6072	0.443876
UBE2F	2	-0.52902	0.443876
SYTL4	4	-0.42561	0.443876
DMKN	3	-0.14493	0.443876
POLR2D	3	0.42488	0.443876
ATP5PB	3	0.48448	0.443876
STOX2	3	0.50991	0.443876
SOWAHC	3	0.68401	0.443876
WDR25	3	0.71777	0.443876
HINFP	3	0.77254	0.443876
DCUN1D3	4	-0.21248	0.444273
GFRA1	2	0.2118	0.444821
LETM1	3	0.6347	0.444821
MTRNR2L9	2	0.43765	0.445706
ABHD5	2	0.82147	0.445706
LGALS7	1	0.67538	0.445745
RPS3A	1	1.164	0.445745
ZNF823	4	-0.45975	0.446047
ZMYND12	4	-0.43644	0.446047
SLC1A7	4	-0.10894	0.446047
PNPLA4	4	-0.42492	0.446272
XYLT1	3	-0.74922	0.446964
ANGPTL4	2	-0.79764	0.447316
GALNT12	3	-0.35714	0.447316
CIZ1	3	-0.35504	0.447316
CRELD2	3	-0.29534	0.447316
RALGAPA2	3	-0.14451	0.447316
KLHL8	4	-0.10381	0.447316
BTNL10	3	0.060233	0.447316
IL1RL2	4	0.18377	0.447316
RNF123	4	0.28199	0.447316
GABARAPL2	4	0.35902	0.447316
CFAP157	3	0.36968	0.447316
POLG2	3	0.3768	0.447316
TMED9	3	0.37931	0.447316
STRADA	4	0.40208	0.447316
CTSS	2	0.4221	0.447316
FCHSD2	3	0.42547	0.447316
KY	3	0.46997	0.447316
PPP2R5B	3	0.47689	0.447316
NME5	3	0.55576	0.447316
TMPRSS11A	3	0.60849	0.447316
ARL5B	3	0.62055	0.447316
TSC2	4	0.62289	0.447316
ECT2L	3	0.64699	0.447316
PSMG4	3	0.65321	0.447316
EXOC5	3	0.72473	0.447316
POLR2I	3	0.89755	0.447316
TBL2	4	0.23656	0.448529
CHTF18	2	0.72399	0.448529
PFN1	4	0.34575	0.450789
RINL	4	0.278	0.451372
PRDM7	4	0.3965	0.451372
TMEM164	2	-0.33254	0.451454
CD59	4	0.24434	0.451454
RAD51C	4	0.37751	0.451454
AATF	3	0.4829	0.451454
FLRT2	3	0.40326	0.452254
C3orf36	3	0.42421	0.452254
BEND6	4	0.31592	0.452336
MFAP1	4	0.47917	0.452336
AURKAIP1	4	0.4804	0.452336
PNN	4	0.22641	0.452546
YTHDC1	4	0.30797	0.452546
SYNGAP1	4	0.42232	0.452546
EEF2K	3	-0.65409	0.45297
FCGR2B	1	-0.61017	0.45297
GDAP2	4	-0.57469	0.45297
RPS21	4	0.50581	0.45297
PUS3	4	0.33202	0.453512
C1S	4	0.1797	0.453618
C2CD2	4	0.2678	0.453814
LTK	4	-0.17984	0.454372
C6orf58	4	-0.42716	0.4564
A4GNT	3	0.47631	0.457065
TEX261	3	-0.76786	0.457603
ESPL1	4	0.35188	0.457603
CTDNEP1	4	0.37411	0.457603
POLR1C	3	0.91402	0.457603
TOR1AIP2	4	-0.38304	0.457633
NOVA2	4	-0.20945	0.457916
CHMP7	3	-0.0098173	0.458127
BRCA2	3	-0.42535	0.45942
PDCD7	2	-1.1661	0.4599
VEZT	2	0.73542	0.461947
ADAM21	4	0.23664	0.464262
CCND1	4	0.25301	0.464262
PRKCA	4	0.38919	0.464262
NPC1	2	0.47584	0.464342
TEKT1	4	-0.35247	0.464692
DYNC1LI1	4	0.093573	0.46517
C1orf61	4	0.22087	0.46517
ASPG	4	0.35348	0.46517
JPT2	4	0.35653	0.46517
HIBCH	4	0.4247	0.46517
LRIT3	2	0.48887	0.46517
CSF1	2	-0.47452	0.465446
GAPDH	3	0.4996	0.466874
SLC35G2	3	0.50077	0.466874
CCDC33	4	-0.21736	0.466888
ADARB1	4	-0.072595	0.466888
PRSS42P	3	-0.46176	0.467002
OVCH2	4	-0.3408	0.467035
BCAS1	4	-0.074357	0.467035
AURKB	4	0.40224	0.467035
IGFN1	4	0.41981	0.467035
CCT5	3	0.63312	0.467035
ADD3	4	-0.4911	0.467235
AMIGO1	3	-0.48947	0.467235
ZNF200	3	-0.48915	0.467235
BTN2A2	4	-0.13268	0.467235
HSDL1	3	0.40387	0.467235
NUP160	3	0.47108	0.467235
ZNF589	2	0.75664	0.470115
NOMO1	1	-0.88078	0.470899
PSMD2	3	0.097958	0.471473
IMPA2	3	0.15456	0.471473
ADM5	3	0.16882	0.471473
HDC	4	0.25927	0.471473
SPAG7	4	0.31758	0.471473
NFKBID	3	0.46611	0.471473
PSMD12	4	0.5214	0.471473
ARMH1	3	0.641	0.471473
ALG1L	2	0.78892	0.471473
ASAH2B	1	0.8075	0.471473
H2AC17	4	0.19817	0.471706
DZIP1	3	-0.12285	0.472025
SEC24A	3	0.1719	0.472025
TOMM20	3	0.34586	0.472025
CNEP1R1	3	0.46119	0.472025
TTK	3	1.0542	0.472025
FOXD3	3	-0.73357	0.472275
COMMD6	3	-0.55532	0.472742
SPATA31C1	3	-0.52556	0.472742
TAFA1	4	0.053845	0.472742
STMN3	4	-0.61347	0.473152
SLC22A31	3	0.36483	0.473152
INTS4	4	0.57837	0.474222
SLC19A3	4	-0.66391	0.474925
MXI1	4	0.27955	0.474979
SERPINE1	3	-0.27426	0.474999
NPDC1	4	0.35964	0.475335
DONSON	3	1.0702	0.475335
TTC1	4	0.46371	0.475895
MUC3A	3	0.27742	0.476873
FAM200A	3	-0.46638	0.477223
LRP11	4	-0.21839	0.477433
ZC3H4	3	-0.45673	0.478288
LGR6	4	-0.014921	0.478288
ARID1A	4	0.45592	0.478288
PLS3	4	-0.50923	0.479157
AHI1	3	-0.41768	0.479157
PHYH	3	-0.40824	0.479157
MYO1C	3	-0.34018	0.479157
MPEG1	4	-0.31262	0.479157
PRDM5	4	-0.29162	0.479157
SPDYE3	2	0.37515	0.479157
C9orf106	2	-0.67586	0.48023
GHRL	3	0.51777	0.480368
TRIM7	2	-0.86536	0.480412
HYAL2	2	-0.84061	0.480412
SCARF2	4	-0.51529	0.480412
RP1L1	2	-0.48182	0.480412
SPDEF	2	-0.45931	0.480412
PSME1	4	-0.41302	0.480412
TTC12	4	-0.37325	0.480412
PLPP2	4	-0.34639	0.480412
TMEM201	4	-0.34565	0.480412
ZNF814	4	-0.33792	0.480412
NKX3-2	4	-0.32089	0.480412
PCDHB1	4	-0.32069	0.480412
RIPK1	4	-0.28393	0.480412
TMEM266	3	-0.26339	0.480412
FTHL18	3	-0.25795	0.480412
HOXC4	4	-0.21487	0.480412
FASN	4	-0.15157	0.480412
GEMIN4	4	-0.12095	0.480412
DPF3	4	-0.091167	0.480412
C1orf159	3	0.20201	0.480412
TMCO3	4	0.22157	0.480412
EIF2AK2	4	0.2421	0.480412
PDXK	4	0.39747	0.480412
CEP104	3	0.40381	0.480412
MGAT5B	3	0.40962	0.480412
CIP2A	4	0.4258	0.480412
ARL8A	4	0.42607	0.480412
CENPE	4	0.44712	0.480412
TOR1AIP1	3	0.48124	0.480412
EXOC3L1	2	0.49007	0.480412
CCDC136	3	0.52513	0.480412
HSP90B1	3	0.58599	0.480412
PWP1	3	0.60562	0.480412
TRAPPC3	2	0.85835	0.480412
ECM1	4	0.29175	0.480802
PHF20	4	-0.19674	0.481733
IFNK	4	0.026285	0.481733
PCDHB2	4	-0.52241	0.483451
VAV3	4	-0.3164	0.483451
CYP4V2	4	-0.20513	0.483451
ABLIM2	2	0.44354	0.483451
SETD1A	2	0.58831	0.483451
SPEG	3	0.49007	0.484376
NDUFB1	1	0.56631	0.484376
BRD3	2	-0.66647	0.48441
ENOPH1	3	-0.63151	0.48441
MFSD11	3	-0.54909	0.48441
ZSCAN1	3	-0.54445	0.48441
TJAP1	4	-0.44035	0.48441
ITLN2	4	-0.40944	0.48441
FMR1NB	4	-0.3804	0.48441
GHITM	3	-0.34006	0.48441
C11orf45	4	-0.25462	0.48441
CCDC18	3	-0.073153	0.48441
PAK1IP1	4	0.0016248	0.48441
TMEM52	3	0.013737	0.48441
ESYT3	4	0.063166	0.48441
CYP1A2	4	0.10086	0.48441
SELENOI	4	0.20456	0.48441
RSRP1	4	0.2777	0.48441
ECSCR	4	0.31691	0.48441
GLCCI1	4	0.33302	0.48441
CCDC137	4	0.342	0.48441
EVPL	2	0.38843	0.48441
RNF208	4	0.39213	0.48441
CACNA2D2	4	0.4313	0.48441
DNAJA3	3	0.46383	0.48441
DDA1	3	0.55357	0.48441
C1orf50	4	-0.57343	0.484598
PTGR1	4	-0.51244	0.484598
DIP2C	4	-0.34709	0.484598
RBM19	4	0.40055	0.484598
ZSCAN23	4	0.40825	0.484895
C15orf48	4	-0.59486	0.4859
PSENEN	4	0.015638	0.4859
PIK3C3	4	0.36478	0.4859
MB21D2	4	0.22354	0.486403
COX8A	4	0.3892	0.486403
WDR7	4	0.40467	0.486403
MMP9	4	-0.43727	0.486887
FOXP4	4	-0.3679	0.486887
INSL4	4	-0.34669	0.486887
FAM184A	4	-0.31193	0.486887
HINT3	4	-0.30158	0.486887
SLC35F5	4	-0.28115	0.486887
GABPB1	4	-0.27036	0.486887
LAP3	4	-0.17812	0.486887
PTPRJ	3	-0.14196	0.486887
IL1A	4	-0.12516	0.486887
PLS1	3	-0.039414	0.486887
PUDP	4	-0.038846	0.486887
PCDHGC4	2	-0.014931	0.486887
RTN4RL2	4	0.12986	0.486887
ZGPAT	4	0.1302	0.486887
GBP4	4	0.28073	0.486887
DCTN3	4	0.31429	0.486887
PRR13	2	0.31722	0.486887
MFAP4	4	0.3289	0.486887
GBE1	4	0.33818	0.486887
KRAS	4	0.36263	0.486887
SAMD13	3	0.37649	0.486887
OPA1	3	0.43477	0.486887
C20orf78	3	0.4708	0.486887
TNPO3	3	0.52346	0.486887
DNA2	4	0.53631	0.486887
TANGO6	3	0.56052	0.486887
FTO	1	0.58406	0.486887
CCDC107	2	0.41315	0.486916
MYC	4	0.35607	0.487495
NOP53	3	0.63893	0.487495
RHBDD1	4	-0.27744	0.487752
ALPK1	4	0.1307	0.487881
MED1	4	0.23056	0.487881
ZNF143	4	0.38999	0.487881
PDZK1	2	0.59332	0.487881
RNASEL	4	-0.58564	0.487944
RPA1	4	0.25671	0.487944
INTS11	3	0.74222	0.487944
UTF1	1	0.76937	0.487944
CACNA1D	3	0.43911	0.488325
PSMG2	3	0.5003	0.488325
ZNF695	2	-0.6574	0.488401
FGF12	2	-0.37785	0.488401
FN3K	4	0.22692	0.488401
MCM6	4	0.23757	0.488401
ZC3H8	4	0.29397	0.488401
CPNE2	4	0.30557	0.488401
RCN1	2	0.57085	0.488401
SNRPF	3	0.94734	0.488401
PRKACA	4	-0.52296	0.488656
APOD	3	-0.056933	0.488656
HDAC10	4	0.31709	0.488656
BGLAP	2	0.35775	0.488656
RPS19BP1	4	0.36947	0.490652
RAD54L2	4	0.25335	0.490994
GALNT10	2	0.42641	0.490994
LEMD1	1	0.79774	0.491037
CREBZF	4	0.373	0.491481
HSPA5	4	0.43141	0.491652
VDAC2	2	-0.33084	0.492298
ZNF513	4	0.24886	0.492298
TMED3	4	-0.4578	0.492999
ASB4	4	-0.38886	0.493892
FAM160A1	4	0.16382	0.493892
KCNAB2	4	0.18467	0.493892
SIRT4	4	0.36606	0.493893
MRPS15	2	0.65432	0.493893
LOC101928436	4	-0.50056	0.495503
PLEKHA5	4	0.052135	0.495503
TRAF4	4	0.15995	0.495503
KRCC1	4	-0.069965	0.496222
SLC35B1	3	0.49317	0.496222
HSPBP1	4	0.032046	0.496389
[truncated: 13,970 more rows]
