# Supplementary material for: Identification of a Novel Cuproptosis-Related Gene Signature for Prognostic Implication in Head and Neck Squamous Carcinomas
Source: Cancers (Basel). 2022 Aug 18;14(16):3986. doi: 10.3390/cancers14163986 (PMC9406337; doi:10.3390/cancers14163986)
Supplement: Supplementary file 1 [file cancers-14-03986-s001.zip › Table S2. Risk scores of all samples.xlsx]

## Sheet: corresponding coefficient
Gene	Coef
DLAT	0.00647777
FDX1	0.302665
SLC16A1	-0.00248884
RAD9A	-0.0790172
TRIM32	0.294347
PFKP	0.147359
MRPL21	0.0940786
MTG1	-0.308227
MRPL15	-0.0423919
SLC25A39	0.226637
YARS2	-0.244462
PDZD4	-0.284573
RRN3	0.16531
TIMM9	-0.264513
COPZ1	0.365461
ATIC	0.0587087
RSL1D1	0.280648
TAF6L	-0.216954
SRP54	0.275108
NDUFB5	0.184742
TOP1MT	0.166859
NRF1	-0.26658
DOT1L	-0.548235
MRPS5	0.25353

## Sheet: TCGA cohort
id	futime	fustat	DLAT	FDX1	SLC16A1	RAD9A	TRIM32	PFKP	MRPL21	MTG1	MRPL15	SLC25A39	YARS2	PDZD4	RRN3	TIMM9	COPZ1	ATIC	RSL1D1	TAF6L	SRP54	NDUFB5	TOP1MT	NRF1	DOT1L	MRPS5	riskScore	Risk
TCGA-CV-7418	2.16164	1	4.55413	4.05051	4.7681	4.55009	3.64878	6.25568	5.04012	2.95376	7.30634	6.87207	5.60206	2.70568	5.16027	5.55658	6.55492	5.84482	5.82032	2.59221	5.79547	6.79995	4.70674	3.49328	3.75564	4.3857	6.50261	low
TCGA-CQ-A4C6	3.70685	0	4.25135	3.75017	7.14312	4.28352	4.57358	6.51456	5.03855	2.67519	7.79435	6.32898	5.00366	1.45455	4.79133	5.71069	6.2518	5.97337	5.52469	2.58899	6.17984	5.77431	4.23644	3.26555	3.02061	3.93387	7.07919	high
TCGA-CV-6936	0.454795	1	4.10567	3.69294	4.49395	3.88539	3.2533	5.51297	5.04037	3.24069	6.79315	7.17722	4.06891	2.47795	4.96583	5.19319	6.91253	6.42327	5.99128	3.33878	5.53242	5.90204	4.16285	3.76445	3.29614	4.69529	6.70468	high
TCGA-CV-7428	4.57808	1	4.10536	2.89318	6.26415	3.55362	4.06124	5.26749	4.99253	2.98348	7.8866	6.44222	4.81683	1.77764	4.7241	5.2984	6.39779	6.25371	6.03306	2.95348	5.36997	5.37085	4.30314	3.56379	3.04059	4.3491	6.38023	low
TCGA-CR-6488	1.03836	0	4.02293	3.97317	6.53341	3.93808	3.70914	5.83366	5.01058	2.59444	6.70545	6.6489	5.18366	1.85516	4.39671	5.19178	5.96713	5.71074	5.15273	3.32289	6.0962	5.18775	3.85636	3.30399	3.53115	3.76523	5.96341	low
TCGA-P3-A5QE	4.27123	0	5.08571	4.325	3.45268	4.59811	4.2713	4.69189	4.76132	3.73688	6.58763	5.66781	5.21829	3.65114	5.49045	5.05648	6.32191	5.98003	5.39366	3.61938	5.92166	5.33338	3.18566	3.70919	3.50105	4.15266	5.15607	low
TCGA-CN-5360	3.49863	0	4.41856	3.9481	4.67208	3.67007	4.42481	5.1154	4.27512	2.86397	5.60019	6.00755	4.33198	3.76616	5.06974	4.70667	6.24451	5.29704	5.26946	2.91477	5.55044	5.72834	2.83085	3.75756	3.59855	3.74185	5.55541	low
TCGA-CV-5966	1.49315	1	5.22061	4.34374	6.87154	3.77113	4.1774	5.6496	5.6235	3.50519	8.11734	6.96745	5.61364	1.33547	5.21931	5.5625	7.41135	5.72078	6.49796	3.22327	5.25529	6.31407	4.6572	3.68745	3.19436	4.6897	7.43108	high
TCGA-CV-7247	1.58082	1	4.54021	3.72455	6.90614	5.02745	3.51978	5.2	7.80274	2.39481	7.05737	6.92673	5.5147	1.43786	5.56289	5.12093	6.80991	6.54229	6.34704	2.63615	5.31759	5.97579	3.92683	3.36936	2.96444	4.30437	7.49109	high
TCGA-CN-5365	0.961644	1	3.80126	3.4231	5.76965	3.46882	3.65738	6.54886	5.23444	2.8476	6.16573	7.63195	5.18756	1.2937	4.47516	5.15904	6.85125	5.60328	5.82013	2.55635	5.06578	5.87561	3.90956	3.2011	2.65415	4.49021	7.50871	high
TCGA-CV-5970	1.11233	1	4.22161	3.7149	6.4438	3.31995	4.53554	5.54666	5.14289	2.73251	6.42405	6.68152	4.35087	1.50868	4.2377	5.10106	6.13573	5.45072	5.22284	3.23472	5.74221	5.90226	3.22214	3.12696	3.13395	3.79763	6.71278	high
TCGA-CR-7377	0.764384	1	4.60675	4.28288	6.43447	3.93261	4.06839	5.52737	5.47648	2.44477	6.4693	6.15506	4.20923	1.76928	5.16443	5.12526	6.29236	5.99505	5.41987	2.58251	5.84062	5.35419	3.66859	3.49542	3.02887	3.62824	7.0073	high
TCGA-CN-4728	3.15342	0	4.22889	4.06634	4.92699	2.97749	3.4582	5.43901	5.0067	2.72973	6.01959	5.6384	4.63027	2.1212	4.32377	4.80524	6.48464	5.21099	5.33359	2.83218	5.22481	5.30213	3.50364	3.31823	3.35704	3.88809	6.01095	low
TCGA-P3-A6SX	3.91781	1	4.04345	3.34864	6.61737	4.57379	3.97303	5.54881	7.3312	3.07871	6.9015	7.15975	5.20791	1.48767	5.15519	6.1962	6.72114	6.24311	6.47452	3.21685	6.31794	5.82706	3.82853	3.29948	3.10653	4.34164	7.15003	high
TCGA-P3-A6SW	3.06849	0	3.99401	3.94422	5.77529	4.73355	3.51982	5.26167	5.13996	3.79558	6.71868	7.15823	5.23148	1.63683	4.58382	5.62996	6.75659	6.28172	5.64264	3.57252	5.38962	7.24547	3.6101	3.58662	3.61179	4.48168	6.0879	low
TCGA-CN-5373	4.33973	0	4.56352	3.84443	5.87646	3.51224	3.17908	5.64555	4.32665	2.45636	6.45643	5.82571	4.25179	1.50855	4.19786	4.17093	5.92915	5.46162	4.5237	2.92089	5.28227	5.04106	2.78627	2.96095	3.42795	3.35535	5.64201	low
TCGA-CN-A49A	1.07123	0	3.78831	3.91191	6.3954	5.27816	3.86952	6.21719	4.27966	3.43726	6.36593	7.11102	5.27435	2.07489	5.26625	5.12247	6.53322	5.07263	6.02756	4.18348	6.0919	6.04066	4.0985	3.58094	3.83086	4.10453	6.0824	low
TCGA-C9-A480	1.05753	0	4.75507	4.0487	6.3424	4.36034	3.75879	4.77755	4.80975	3.36976	7.39862	6.63561	4.58913	2.70785	4.79085	4.91038	6.15976	4.92793	5.60255	2.74247	6.10181	5.72976	4.11872	3.12102	3.27155	4.01774	6.2463	low
TCGA-CN-6021	0.756164	1	4.7498	3.98683	4.7282	2.93011	4.68401	4.64119	4.82707	2.39057	7.19783	6.42084	5.06105	1.53002	5.58948	4.86696	6.34353	5.50061	5.79462	2.91994	7.26175	6.40395	3.42442	3.53697	3.72036	4.18822	7.35369	high
TCGA-CR-6470	4.16712	0	4.44725	3.83519	5.50563	3.59407	4.03564	5.58648	4.07847	2.69746	6.47791	5.63219	4.9329	1.55037	5.0355	4.28175	6.63949	6.29928	5.54898	3.44857	5.1786	6.49823	3.19997	3.79866	3.90261	4.11921	6.16653	low
TCGA-BA-6868	0.520548	0	4.4836	3.63833	6.67319	3.70262	4.66262	6.05164	5.13112	2.8371	6.70846	6.29042	4.64906	2.57693	4.60774	5.01567	6.40517	6.35687	5.46576	2.85464	5.7237	5.39635	4.61153	3.00259	3.32458	4.05304	6.77412	high
TCGA-CV-A45Y	7.40548	1	4.46448	4.53159	4.89927	4.48426	3.65428	5.76739	4.66094	3.89474	6.77525	6.65568	4.70628	1.93705	4.84589	5.19907	6.42132	5.85365	5.4107	3.15541	5.56161	6.23732	4.3347	3.49943	2.97244	4.11243	6.55289	low
TCGA-UF-A7JA	5.18904	0	4.23727	3.74393	5.32828	3.82183	3.86567	6.35689	8.13823	3.65734	6.82566	6.49918	4.78557	3.54896	5.14402	5.28073	6.57798	6.5271	5.87175	2.76648	5.15258	6.7359	4.98222	3.22848	3.77384	3.90664	6.40458	low
TCGA-HD-A6HZ	0.30411	0	4.69692	4.06273	6.74574	3.711	3.0518	6.56337	4.48498	3.07881	6.74359	6.08942	6.15216	1.58084	4.82567	4.98199	6.43161	5.74872	5.90306	2.67647	5.69196	5.72115	3.55077	3.25046	2.94896	4.72964	6.60398	low
TCGA-CV-7411	7.44384	1	4.22851	3.8971	5.53824	2.75673	2.2768	6.62376	4.36492	2.26881	5.5506	6.48865	4.37286	1.61751	3.89765	4.05413	6.04099	5.0056	4.77509	2.20339	4.93392	4.68634	2.62635	2.51757	3.47029	3.38655	5.92076	low
TCGA-BA-6870	1.23562	1	3.40028	3.46185	6.52356	3.68416	4.04845	5.29987	5.13106	2.98752	7.0514	6.58973	4.17483	2.61878	4.4569	4.64276	6.6578	6.00745	5.49844	3.1176	5.65698	5.70505	4.53027	3.28161	3.34273	3.89893	6.53425	low
TCGA-CV-7091	9.26301	0	4.7386	4.13361	6.70871	3.39629	3.23308	5.54199	4.87903	2.84818	6.95709	6.41861	5.38869	2.78625	5.15369	5.08859	6.6631	5.43347	6.43992	3.11378	5.871	6.10871	4.36219	3.21123	3.17719	3.72077	6.60456	low
TCGA-CR-7379	2.83836	0	5.56834	4.13596	6.71349	2.71751	3.95351	5.94206	5.65715	2.66214	7.67816	6.70951	5.72465	1.60805	5.20767	5.38555	6.85502	6.54334	6.54521	2.85963	5.7397	5.63266	4.41341	3.30341	3.40896	4.07054	7.32622	high
TCGA-CV-7100	0.750685	1	4.48982	3.49122	5.89486	3.95091	4.87954	5.90687	5.30691	2.8551	6.5547	6.48775	5.01802	1.61202	5.12736	5.59585	6.7975	6.41361	5.6286	3.04647	5.85526	6.88465	3.88877	3.54185	2.87491	4.39992	7.46557	high
TCGA-CQ-5324	4.36438	0	5.1892	3.95813	6.02142	2.84746	3.97408	6.40728	4.92714	2.64198	6.70265	6.53946	4.87841	1.32635	4.66043	4.6334	6.5499	6.29777	5.09672	2.68493	5.42206	5.21831	3.61118	3.18017	3.3376	3.74442	6.86885	high
TCGA-CQ-6222	3.85479	0	5.04748	4.48068	4.71838	3.21598	3.411	4.71721	4.58112	2.70616	6.82525	6.20318	4.13169	1.85148	4.76891	4.7199	6.05299	5.30317	5.26543	2.69969	4.99219	5.81371	2.87701	2.90453	3.14982	3.98499	6.39063	low
TCGA-CV-7424	1.2411	1	4.35987	4.27633	4.80146	3.79437	3.84634	5.76035	5.04546	2.68058	6.79149	6.80508	4.96115	2.25423	4.6305	5.4421	6.74415	6.49697	5.54236	2.9707	5.50248	6.83451	4.45801	3.58019	3.11468	3.87833	6.96488	high
TCGA-CV-7103	4.3589	1	4.90279	4.44045	4.7853	3.3438	4.34463	5.80332	4.4474	2.59939	6.28271	6.24082	5.43949	2.07405	4.98662	4.9242	6.51562	5.0149	5.17805	3.16184	5.58842	5.75516	3.19656	3.35563	3.27193	3.64677	6.41382	low
TCGA-RS-A6TP	1.4137	0	4.18007	3.31065	5.86418	4.44238	3.62433	6.62368	5.13152	3.16593	6.3698	6.24176	4.22524	1.36629	4.79826	4.90059	6.53735	5.79956	5.09098	3.53278	5.45588	6.01414	4.02497	4.15413	4.46718	4.37835	5.66223	low
TCGA-CV-6956	0.594521	1	4.98697	3.87135	7.40583	4.03825	3.90795	6.1005	6.10134	2.38556	6.28587	7.40499	4.91176	1.35207	4.59555	5.41539	6.86111	6.32076	5.8085	2.84159	5.52014	5.46711	4.07078	3.21397	2.92312	4.35415	7.65265	high
TCGA-BA-A6D8	2.32877	0	3.93932	4.77377	3.93009	4.05714	3.24855	5.43658	6.56919	3.58002	7.31399	7.9671	5.24352	3.15869	3.51635	5.71147	7.22331	6.69175	5.30501	3.96035	4.10656	6.74121	5.85916	3.87303	3.52472	5.01991	6.12025	low
TCGA-D6-A6EQ	1.00822	0	3.68505	4.18476	5.19233	4.09213	3.60229	5.40029	5.63337	3.01201	7.30722	7.30355	4.47727	1.94856	3.50321	5.26446	6.9892	6.4093	5.99455	2.85321	5.24705	6.07674	4.23666	2.88426	2.91822	3.94521	7.19336	high
TCGA-CN-4736	1.08219	1	5.02102	4.63166	5.52097	3.30575	3.95666	5.56447	4.33235	2.84911	6.78643	5.76808	4.66533	1.67809	4.79751	4.81447	6.65375	5.90505	5.29471	2.6999	5.6088	5.77992	3.39188	3.2126	2.68625	3.87785	7.10393	high
TCGA-D6-A6EN	1.20274	0	4.17235	4.19267	5.41305	4.19233	3.42428	5.90572	6.06923	3.34102	8.45226	7.54922	4.93375	1.26861	4.18974	5.88791	7.17422	6.90224	6.05991	2.86615	4.7331	6.07155	4.84254	3.25462	2.87169	4.79087	7.40176	high
TCGA-TN-A7HI	1.12877	0	3.4796	4.4769	4.10989	4.43702	3.56855	5.79792	6.11884	3.57356	7.71036	6.83159	5.0806	3.50097	3.97487	5.92969	7.375	6.2173	5.5537	3.38662	5.68076	6.03273	4.96545	3.96398	3.72485	4.7203	5.95535	low
TCGA-F7-8489	1.80274	0	4.73154	4.19721	6.59339	3.49285	4.07001	5.56229	4.26783	3.17749	6.29162	6.53105	4.8521	1.6674	4.80567	4.38788	6.12777	5.77559	5.04948	3.11626	5.5766	5.85236	3.53278	3.03768	3.17663	3.94719	6.60875	low
TCGA-BA-A4IG	2.34247	0	4.79554	3.87972	7.14155	3.96838	3.43838	5.62528	5.3302	3.50438	7.35957	6.39651	5.35799	1.51335	5.00799	5.27717	6.01547	5.23869	6.32548	3.39753	5.94965	6.76632	3.12276	3.35255	4.05272	4.58949	5.96549	low
TCGA-CV-A45T	13.3041	1	4.63393	4.4951	5.03218	3.945	3.67696	5.21888	5.23039	3.10448	7.62392	6.8337	5.42753	1.92057	4.89498	5.48402	6.58732	5.86796	5.82485	2.95634	5.6733	5.39809	3.52975	3.305	2.87818	4.09931	6.63619	low
TCGA-CV-A45R	15.0137	0	4.25744	4.35429	5.67599	4.30506	3.08841	5.18587	4.81913	3.24936	6.46591	7.09855	4.47308	1.7115	4.38525	4.58561	6.55434	5.15803	5.10629	3.49509	5.31559	5.42474	3.56102	3.2635	3.2167	3.41236	6.04571	low
TCGA-CV-A45Q	14.1151	1	3.30739	3.64644	4.40171	3.12421	1.92714	5.29873	5.88412	3.01215	6.11207	7.41154	4.52559	1.29065	2.75817	6.84538	6.43303	5.99377	5.77683	2.49347	4.49745	4.97267	4.63976	2.80674	2.81371	4.8696	6.08984	low
TCGA-HD-8224	1.22192	1	5.58043	4.41876	5.53602	3.96554	3.43791	6.46025	4.4375	3.40544	7.31578	6.32928	3.98588	1.6106	4.66081	4.65785	6.67907	4.8957	5.23847	3.59524	5.29853	6.26322	3.43054	3.42361	3.70127	4.01346	6.28955	low
TCGA-CV-7446	2.99452	1	5.11231	4.91925	5.02351	3.11383	3.30006	5.16649	4.14821	2.33985	6.53965	5.72674	5.28677	1.58478	5.3924	5.60224	6.52713	5.96941	5.99164	2.54466	6.63199	6.55826	4.56439	3.46041	3.23498	3.62558	7.23824	high
TCGA-CV-7254	3.99726	1	4.86904	4.36859	5.10559	3.13804	3.40483	6.08349	5.42179	2.49804	7.33631	6.35328	5.33451	1.63402	4.49338	5.35296	6.49329	5.90689	5.51798	3.24984	5.45787	6.60224	4.48729	3.42528	2.82255	4.50806	7.13426	high
TCGA-CQ-A4C9	1.93699	0	5.1099	4.20614	6.6238	4.41064	3.01171	5.41848	4.92463	3.27702	7.58709	7.18582	4.9718	2.8977	4.93089	5.30516	6.61956	6.1181	6.0073	3.4119	5.62595	6.14703	4.78383	3.76825	3.63333	4.79022	6.18176	low
TCGA-P3-A5QA	4.72877	0	4.36935	3.51113	6.58807	3.49003	4.91768	5.97608	5.27056	2.71419	8.57228	6.50394	5.30787	1.60345	4.89518	5.07206	6.80373	6.09987	5.04821	2.744	6.17396	5.36078	3.8222	3.25533	3.19824	4.07803	7.01599	high
TCGA-CN-A499	1.46575	0	4.43605	3.8287	7.00387	4.23947	4.39688	6.36071	4.97322	3.53399	6.63001	6.14963	5.10713	1.43032	4.93338	5.48408	6.44163	6.22996	5.44445	3.10446	6.25305	6.19542	3.04928	3.33825	3.55003	4.21004	6.4465	low
TCGA-F7-A50J	1.60274	0	4.35963	4.23749	5.91134	4.63773	3.65224	5.31638	5.65735	2.92436	7.186	6.72594	5.22322	1.45783	4.76064	5.28945	6.58846	4.89318	5.7948	3.1217	5.7089	5.57628	3.97714	3.16068	2.77543	4.14141	6.92904	high
TCGA-CV-5973	7.23562	0	2.99247	3.40068	4.7618	4.41195	2.13571	5.08943	6.07272	2.61415	6.37184	7.72431	4.59141	1.32846	3.82161	4.99137	6.49461	4.80567	4.56205	2.94162	5.02301	5.4469	3.43187	2.96783	3.006	3.52363	5.83661	low
TCGA-CQ-A4CE	2.15068	0	4.92733	4.03398	5.35038	3.93339	2.41982	5.0459	4.48706	3.29989	7.33502	6.68066	4.97439	1.67636	4.56356	5.04198	6.56275	5.45918	5.62612	3.06089	5.98592	5.60105	3.87734	2.98478	3.65123	4.04954	5.91193	low
TCGA-BA-A4IF	2.45205	0	5.50795	4.07683	6.68572	3.36534	3.4566	6.20141	5.33703	3.17018	7.22582	6.67624	5.65044	3.51204	5.34116	5.29793	6.39533	6.48162	5.94778	2.82428	6.02024	6.76128	4.38342	3.3298	2.99026	4.90568	6.87856	high
TCGA-BA-4074	1.26575	1	4.6517	4.74383	6.69033	3.26037	3.79557	5.16875	7.22833	3.30845	8.97188	7.69231	5.41745	1.41675	4.648	6.67425	7.1743	6.09873	6.40202	1.92882	6.01738	7.35419	2.59393	2.95639	2.00376	3.79052	8.2487	high
TCGA-CV-6939	1.82466	1	4.88449	4.40402	5.1069	3.79638	3.49615	5.30327	4.58112	2.79947	6.10712	5.59796	5.06032	1.64222	5.49119	4.7073	6.55159	6.07605	5.61567	2.84733	5.56076	5.70669	2.65687	3.80167	3.85789	3.95944	6.0107	low
TCGA-CV-6934	0.178082	1	4.58683	4.10278	6.25952	3.29647	3.6939	5.46223	4.86836	2.49997	6.41516	5.92134	4.63735	2.01001	4.67682	5.13649	6.28149	5.38635	5.46902	2.95246	5.8149	5.67729	3.72124	3.20489	2.90454	3.74854	6.63322	low
TCGA-CN-A498	1.2137	0	4.4194	3.67647	7.49667	3.8439	3.31088	6.55517	5.05844	2.98609	6.12426	6.70078	4.71045	1.62104	4.47261	4.83893	6.56697	5.53704	5.01983	2.83589	5.71226	6.45762	3.13625	3.23416	3.39167	3.8576	6.48338	low
TCGA-D6-6824	0.210959	0	5.12574	4.38716	5.68419	3.01227	4.17229	5.65036	4.54603	2.5124	6.53622	5.85724	4.85767	1.75184	4.814	5.20953	6.5366	5.75643	5.416	2.68478	5.85017	5.7073	3.12611	3.32463	3.00967	3.59669	6.8304	high
TCGA-CN-4722	2.18904	0	4.7239	3.60831	5.26292	2.81273	3.19359	5.28425	4.4441	2.86135	6.8039	6.87998	4.45848	1.85677	4.34832	4.40787	6.41452	5.82459	5.14856	2.45155	5.15611	4.96159	3.56737	2.84413	3.22976	3.63883	6.27092	low
TCGA-CV-6961	0.208219	1	4.31576	3.99162	6.27485	3.16363	4.43023	5.84672	4.54898	2.55534	6.33076	5.75784	4.7504	2.07732	4.83739	4.9706	6.20355	6.35078	5.51297	2.90046	5.63557	6.11315	3.43437	3.27223	3.07018	4.06045	6.83011	high
TCGA-CR-5243	7.01918	0	4.46052	3.47231	5.24761	4.13854	3.21184	5.36379	4.47525	3.07288	6.69052	5.7575	4.94678	1.44871	4.54696	4.74772	6.56403	5.44697	5.20372	3.28088	5.58002	6.02415	2.97454	3.78778	4.03656	3.84443	5.20853	low
TCGA-CQ-A4CD	2.73425	0	3.86371	4.00397	5.85802	4.28415	4.34131	6.54529	5.71538	3.33727	6.30272	7.30863	5.54082	1.26436	4.64927	5.93025	6.68946	6.20971	6.23107	3.16194	5.36974	5.60098	4.86755	3.10021	2.76716	4.46278	7.49421	high
TCGA-P3-A5QF	0.90411	1	4.05951	3.74613	5.57509	3.32432	3.29355	4.96214	4.72117	3.31227	7.07532	6.54423	4.84439	1.43266	5.06411	5.44488	7.01778	6.19253	5.47029	2.95423	6.04077	6.52719	2.49227	3.48597	3.37491	4.57426	6.48194	low
TCGA-TN-A7HL	1.13973	0	3.6881	4.16402	5.3031	4.31506	3.03059	5.82198	5.59987	2.97619	6.97481	6.73072	5.16779	1.41595	4.45197	5.21947	6.52707	6.50668	6.06359	3.40002	4.66222	6.37229	3.84262	3.6173	3.74014	4.77343	6.23623	low
TCGA-IQ-7631	3.21096	0	4.75101	4.73267	3.39736	4.76563	2.98881	6.32695	5.44642	3.00278	6.29891	6.46117	4.35901	2.13304	4.7834	4.92554	6.28978	4.94939	5.66717	3.09215	4.97802	5.66789	2.94951	3.11992	2.80601	3.86342	6.51671	low
TCGA-CV-7422	2.8411	1	4.70595	4.28786	6.87143	3.8618	4.16877	5.46166	7.49169	2.50012	6.02801	6.09614	5.54643	1.3671	5.27895	5.64591	7.22843	6.0999	6.1847	3.58592	6.03865	6.6165	3.89901	3.43367	3.36098	4.3084	7.55863	high
TCGA-CV-7568	2.53973	1	5.09608	4.28244	7.43346	3.77315	3.6121	5.41356	4.56121	2.76413	6.37118	5.588	4.95041	1.74731	5.39881	5.28112	6.63577	5.16599	5.84597	2.68353	5.8941	5.43041	4.06725	3.2163	2.3515	3.96101	7.18299	high
TCGA-QK-AA3J	0.813699	0	4.51278	4.16544	4.1038	4.43111	3.14038	5.15992	5.34134	3.24397	6.81634	6.00081	4.40878	2.10069	4.89988	5.29549	6.75174	6.16796	5.6167	3.22469	5.9402	6.08544	2.97638	3.71124	3.75176	3.96003	5.84088	low
TCGA-CQ-5332	0.868493	1	5.42474	4.10354	5.99435	3.2273	3.8168	6.3847	4.96374	2.87804	6.71203	6.69243	5.85623	1.76383	4.72096	5.28238	6.82397	5.54641	6.34195	2.91422	5.53647	6.36386	5.08291	3.58825	3.63565	4.28175	6.98307	high
TCGA-BA-6869	0.745205	0	4.91364	4.76189	6.11118	4.07991	1.97674	7.6086	5.43055	3.02408	6.75403	7.03344	5.13368	1.65104	5.27238	5.05045	6.46675	6.10091	6.22197	3.3525	5.71508	6.36625	4.1487	3.39827	3.57982	4.30887	6.94081	high
TCGA-CR-7402	2.49589	0	5.18052	4.93486	6.32574	3.79906	4.53986	5.80532	4.92646	2.90894	6.50074	6.04746	4.77369	1.71384	5.06796	5.00411	6.4658	5.21901	5.66987	3.25017	5.70179	6.17858	3.00059	3.64116	3.55151	3.79794	6.73569	high
TCGA-CN-4734	2.07671	0	4.46576	4.17134	5.70688	2.54886	3.64382	5.9208	4.0419	2.71945	6.82158	6.27743	5.02373	1.39706	4.64369	5.21143	7.08092	5.92202	5.1641	2.47775	5.90636	4.87236	3.0649	2.94538	3.27598	3.77588	6.71966	high
TCGA-HD-7229	0.865753	0	5.17279	4.05234	7.2091	3.89579	4.41372	6.45557	4.7412	2.82042	7.322	6.00196	4.73666	2.23638	4.63578	4.85056	6.36739	5.7418	5.14558	3.20647	5.74341	5.49956	3.56125	3.04344	3.19493	4.14235	6.5904	low
TCGA-CQ-6219	1.31233	1	5.36417	4.50804	4.62708	3.56187	4.35083	5.85042	5.07961	2.60623	7.83176	6.77858	5.49773	1.39378	5.57326	5.24626	6.8551	6.53238	5.81995	3.1602	5.57439	6.37167	3.84933	3.30565	3.19078	3.99163	7.49178	high
TCGA-CN-A63U	1.4411	0	4.9639	5.5397	6.19927	4.40093	1.6271	5.90592	6.18856	3.79631	6.77656	7.55558	5.28796	1.87199	5.63355	5.83047	6.86548	6.56034	6.20842	3.46899	5.37093	6.82451	5.04217	3.57483	3.17728	4.65665	7.04508	high
TCGA-BA-7269	3.48767	0	4.15763	2.99187	5.12142	3.47569	2.57231	3.63586	5.87861	2.77138	6.99201	7.29824	4.27745	2.62381	4.0643	5.93452	6.87738	6.37586	5.35589	1.92234	5.2978	7.32621	4.13112	3.25033	2.23694	4.73981	6.88713	high
TCGA-CR-7369	2.9863	1	4.27939	3.75774	6.8898	4.20981	4.00906	5.13918	5.13592	2.36774	6.69576	5.97074	4.84876	1.56951	5.52106	4.99754	6.31983	5.74428	5.50362	2.8979	6.02351	5.86275	3.53527	3.29685	3.70784	3.85339	6.4923	low
TCGA-CQ-7065	3.65753	0	5.06858	4.45953	7.33428	3.68133	3.73996	4.62215	5.34077	2.28581	7.31075	6.6667	4.93291	2.70862	4.44773	4.85394	6.65041	5.79625	5.3575	3.46014	5.84383	5.76263	3.75792	2.98188	2.83503	3.65963	6.73052	high
TCGA-H7-A6C4	1.13425	0	4.16088	3.96206	6.03451	2.9896	3.8173	5.62282	4.2218	2.625	6.46942	6.93731	4.5789	1.55052	4.63341	4.81822	6.33489	5.2065	5.12401	2.26024	5.5436	5.1011	3.86246	3.11154	3.07977	3.57112	6.81194	high
TCGA-CV-6941	0.936986	1	5.05878	3.96303	6.15271	3.82277	3.4369	6.24647	4.54959	2.92426	6.83981	6.56337	4.73287	2.61617	5.18419	5.25701	6.37985	5.51765	6.03251	3.2304	5.88534	5.61918	4.33422	3.54951	3.52277	4.14138	6.33668	low
TCGA-MZ-A6I9	1.33973	1	4.85388	4.19616	4.9067	4.8633	3.42645	5.50896	5.53843	3.60095	6.92755	7.00176	5.02714	1.78981	4.77977	4.89872	6.71466	5.45834	5.61318	3.81204	5.77446	7.09337	3.62037	3.64717	4.04492	4.68889	6.21051	low
TCGA-D6-8568	2.07945	0	4.97437	4.07015	6.49404	3.81737	3.61645	5.8376	5.27675	3.34646	7.42276	6.57983	5.25259	1.48407	4.89481	5.00031	6.24484	5.36298	5.84016	3.13997	5.64361	5.95631	4.6311	3.44747	3.6631	4.15947	6.40059	low
TCGA-CQ-6228	1.24932	1	4.12361	3.63088	6.77859	3.07968	4.41343	6.91863	6.16964	2.38699	7.05304	6.19217	5.34643	1.57343	5.47465	5.70615	6.91397	6.68295	6.39409	2.50675	5.75265	6.47549	4.94075	3.55243	2.97914	4.54404	8.11887	high
TCGA-CN-4726	0.389041	1	4.82951	4.1744	6.99613	3.16269	3.91451	5.17633	4.98814	2.68235	7.00537	6.85542	4.87804	1.79346	4.72047	4.52373	5.83214	5.52803	4.53627	2.22994	5.74817	6.14657	3.39181	2.78773	2.33613	4.03949	7.25088	high
TCGA-UF-A71D	3.43014	0	5.67123	4.69304	6.77318	4.61258	3.51787	5.87108	6.52769	3.10721	6.97042	6.97616	4.80906	2.93248	5.07497	5.11971	6.66404	5.19928	6.09089	3.38496	5.72661	5.95624	3.66414	3.66711	4.15815	4.1187	6.18288	low
TCGA-CQ-7069	3.49041	0	4.31668	4.02198	6.80955	3.59379	3.66001	5.10626	4.32025	2.92162	6.34952	6.51814	4.74809	1.48623	4.64092	4.53666	6.21624	5.26366	5.08157	2.91885	6.03498	5.42061	3.36152	3.3608	3.54766	3.41303	6.09235	low
TCGA-D6-A6ES	1.06575	0	1.36551	4.03189	4.53182	3.3223	2.44767	5.40702	6.21696	2.21584	6.84043	7.03591	3.68742	1.77965	3.53878	5.9318	6.83229	5.89276	5.29824	1.86548	3.9681	6.78529	5.27612	3.28944	2.38696	5.31053	7.59872	high
TCGA-BA-A4IH	1.70411	0	4.6291	4.34655	5.38291	3.5687	4.45125	5.63316	4.41514	3.25733	6.86707	6.23728	5.15303	2.67639	4.50054	4.95235	6.54185	6.18707	5.31985	3.28941	5.63511	7.08742	3.35682	3.57023	3.43843	4.32541	6.34989	low
TCGA-CN-6019	1.18356	0	4.37292	4.25833	3.63504	2.95098	3.36892	5.26304	4.61409	2.48267	5.80863	6.11558	4.23452	2.62096	4.33236	4.66742	6.29614	5.50422	5.25638	2.66738	5.57967	5.60612	3.60356	3.02956	2.95223	3.51943	6.51009	low
TCGA-CV-A45P	1.75068	0	4.65602	3.85108	5.88541	3.30728	3.3343	5.76538	4.70016	3.11651	7.04366	6.93334	4.92049	1.58165	4.70728	4.80937	6.31739	5.54104	5.45843	2.70525	5.41457	5.16305	3.67636	2.84618	3.45149	4.07703	6.37678	low
TCGA-CV-7238	7.47123	0	4.60682	4.31684	4.96912	4.05402	3.38986	6.1728	4.86833	3.44779	7.51276	6.77806	4.7248	2.01824	4.72689	5.31418	6.17837	5.59537	5.42302	3.29134	5.73872	5.63438	4.53364	3.32156	3.12101	3.92357	6.33918	low
TCGA-CX-A4AQ	4.26027	0	3.68426	4.28514	4.11631	5.34375	3.18125	4.96864	5.35105	4.34816	6.05128	7.04616	4.88218	4.47616	3.9972	4.86453	7.0906	6.29596	5.5319	4.05082	4.66372	5.96469	4.3161	3.88089	3.38441	4.3355	4.91617	low
TCGA-BB-4227	0.367123	0	4.55082	4.02111	6.15686	3.38782	3.91804	6.40127	8.02114	2.99837	7.76399	7.19231	4.84899	1.72593	4.82819	5.57132	7.10635	4.9521	5.75789	2.91545	5.8198	6.40265	3.92214	3.28036	3.1168	3.94816	7.56667	high
TCGA-MT-A67A	2.50411	0	4.38922	4.06747	4.77607	3.87471	3.10381	4.94053	5.43723	3.62033	6.81697	6.88447	5.44938	1.55523	4.04927	5.12646	7.09236	6.45673	5.59821	2.71971	4.9192	5.42219	3.92631	3.15742	2.98386	4.46852	6.40626	low
TCGA-CV-7416	2.09041	1	5.74111	4.56819	6.53815	3.82725	3.79628	5.70889	4.70649	2.5438	6.8799	6.28433	5.02878	1.59488	4.85792	5.20115	6.70034	5.55583	5.15187	3.0354	6.14814	5.39541	3.86933	3.12385	2.9634	3.89605	7.02158	high
TCGA-UF-A71B	3.6137	0	4.36249	4.26386	6.6718	4.57062	3.53487	5.9304	6.60581	3.11655	6.78095	6.9516	5.59641	1.52771	5.13462	5.6848	6.37871	6.85037	6.09199	2.99934	5.18256	6.04432	4.79129	3.65558	3.62899	4.52551	6.66404	low
TCGA-CV-6935	0.808219	1	4.21069	3.79987	4.92503	2.92919	3.81833	6.68062	6.35137	2.44353	5.88854	6.42742	4.72733	1.55693	5.15367	4.25537	6.82568	5.89625	5.61961	2.72045	5.02994	6.22835	4.65393	2.93838	3.00569	3.90888	7.91952	high
TCGA-CV-7437	1.3863	1	4.83527	4.32463	6.38531	2.82106	3.62767	6.03559	4.36415	2.70613	7.097	6.84873	5.31847	1.79001	4.47481	5.21954	7.15916	6.0205	5.5181	3.12888	5.86613	7.3	4.21414	3.0914	2.84264	4.23972	7.63358	high
TCGA-QK-A6II	0.778082	1	3.52237	3.99818	5.9527	3.53187	2.59366	5.06168	4.88176	2.84917	7.2209	7.66985	4.08005	1.92766	3.75401	4.44451	6.61117	5.44799	5.60092	2.38694	4.22506	5.55704	4.27862	2.98918	3.07609	4.1218	6.61517	low
TCGA-CR-6480	0.991781	0	4.36192	3.9169	5.07629	3.97731	3.83615	4.90697	4.56295	3.06137	6.07016	5.81079	4.92267	1.44558	4.92564	4.40223	6.77122	5.45249	4.57873	3.45636	6.085	6.54619	2.33689	3.50604	4.04472	4.29275	5.85884	low
TCGA-T2-A6WX	0.572603	1	4.7436	4.49169	6.66967	4.144	4.37583	6.0834	5.49579	3.74893	7.48559	7.1086	5.33188	1.43227	4.77505	5.49785	7.00622	6.75099	5.90472	3.1503	5.89084	5.65595	4.67694	3.33503	3.11838	4.64002	7.46409	high
TCGA-CN-6997	1.17534	0	5.9031	4.82539	5.69498	4.44976	3.57863	6.94425	5.51041	3.38867	5.9078	6.50696	5.23185	1.48171	5.2341	5.51699	6.54784	6.11646	6.33674	3.49403	5.87915	6.33531	4.59844	3.46781	3.65928	4.40181	7.12599	high
TCGA-D6-6823	1.92055	0	4.95855	3.39442	7.53337	3.8842	3.50981	5.53922	5.45871	3.07796	8.05478	7.04652	5.34004	1.94158	5.84873	5.60747	6.65837	6.93849	6.71159	3.30233	5.98026	5.59674	5.02003	3.51088	3.71205	4.56291	6.7397	high
TCGA-CV-7242	3	0	4.81428	4.60409	5.29795	3.94008	3.79628	5.83906	4.62236	3.38133	5.92922	6.22846	4.99976	2.54058	5.16905	5.19865	6.6145	5.90367	5.77542	3.49963	5.83504	5.79202	4.25085	3.49817	3.45682	4.09683	6.38617	low
TCGA-T2-A6X0	0.591781	0	3.95062	3.84058	5.71197	4.20516	4.7792	6.48416	5.1007	3.0268	6.39657	6.07363	4.48906	1.39141	5.13899	4.75059	6.79361	6.56958	5.90488	3.49975	5.33747	6.78964	3.13016	3.72686	3.86201	4.14421	6.90688	high
TCGA-CV-5442	6.37534	0	4.94415	3.25812	7.0335	3.76329	3.49569	4.15818	4.18954	2.86413	6.4394	6.82085	4.35565	2.47074	4.50739	4.612	6.84049	5.51189	5.5062	3.15506	5.41242	5.37275	3.56401	3.91379	4.58616	3.59171	5.00004	low
TCGA-F7-A61S	1.57808	0	4.58679	4.20516	6.10304	3.9267	4.10815	6.22215	5.39329	3.0456	7.45951	7.00383	5.5987	1.38945	4.69682	5.62089	7.03033	6.10076	5.56565	2.66073	5.60649	6.11779	4.0699	3.07159	2.90228	4.59891	7.48835	high
TCGA-CV-7090	14.389	0	4.24963	3.80609	7.73687	3.4299	4.14156	5.1826	4.79851	2.40768	7.60243	6.16671	4.64963	1.43744	4.64515	5.1408	6.05775	6.24957	5.36742	2.6549	5.89596	5.19005	4.08331	3.22653	3.37994	3.39354	6.43955	low
TCGA-CV-7410	17.5808	1	4.69841	3.99588	5.87929	3.57729	3.70524	4.9205	4.63051	2.61657	6.55748	6.50075	4.3296	2.46446	5.06043	4.90757	6.41615	6.18438	5.60677	2.7814	5.51647	5.77019	3.21374	3.50403	3.34448	3.86197	6.37074	low
TCGA-CR-7391	2.50137	0	4.65512	4.25668	5.44641	2.99499	3.67724	5.16789	4.23417	2.65821	5.8592	6.2457	4.43084	2.17168	4.46258	4.5085	6.09909	5.34471	5.13274	2.63265	5.14574	5.11308	2.94332	2.78906	3.19533	3.51719	6.16217	low
TCGA-BA-A6DI	0.920548	1	4.88086	4.27668	5.86734	3.60356	3.95102	5.50097	4.89485	3.03882	7.06599	6.50443	5.35757	1.55978	5.16413	5.13835	6.45714	5.63332	5.44259	3.03823	6.1605	5.75866	4.06319	3.17013	2.97362	3.84849	6.9355	high
TCGA-IQ-7630	1.32877	0	5.37316	4.41769	6.81993	3.95169	4.57193	5.983	5.50284	3.07054	7.51213	7.0358	5.05596	1.46461	4.84306	5.42562	6.75921	6.59717	5.91172	3.00022	5.63739	5.29393	4.24932	3.22452	3.48611	4.35096	7.2661	high
TCGA-UF-A7JV	0.246575	1	4.58307	4.17436	6.30968	3.67796	3.80745	6.54353	5.15679	3.32923	7.15595	6.96735	5.24249	1.32266	4.13559	5.12916	6.49979	6.28429	5.38645	2.80932	5.47538	5.30346	4.13708	3.209	3.04616	4.46698	6.90539	high
TCGA-CN-4733	4.34521	0	5.17112	4.09734	5.95519	3.15679	4.67103	5.15151	4.63568	2.75626	6.80139	6.48012	4.97436	1.72012	4.68802	4.85053	6.4841	5.92259	5.357	3.06198	5.73597	5.38058	2.98776	3.37697	3.00183	3.80558	6.74263	high
TCGA-CV-7180	0.89589	1	4.88245	4.03214	4.79425	3.16873	3.66016	5.13558	5.37559	2.59279	6.87477	7.01875	5.34036	1.71433	4.81324	5.41785	6.63229	6.26308	5.83943	2.85925	5.48472	5.71458	3.70441	3.07986	3.25925	4.42311	6.90517	high
TCGA-QK-A8ZA	1.00822	0	5.23717	4.3061	5.69743	4.52693	3.47469	5.47492	6.17791	3.2873	6.11809	6.43734	5.27937	1.65132	5.11455	6.56168	6.59059	6.02448	5.95784	3.00193	7.1491	6.27794	4.25594	3.60689	3.37068	4.52762	6.86997	high
TCGA-CR-5250	2.18904	0	4.24753	3.40115	4.50117	3.79493	4.36635	4.10951	4.24242	2.97312	5.89691	5.74308	5.07427	1.61873	4.73161	4.83828	6.59205	5.96539	5.48173	3.28338	5.59715	5.46744	3.4015	3.67073	3.75436	4.03202	5.66059	low
TCGA-TN-A7HJ	1.10411	0	4.64786	4.1583	6.06225	4.03423	3.1176	5.76665	5.08401	2.97614	7.01615	6.41713	5.21366	1.94386	4.83145	5.13565	6.47103	5.98564	5.52566	3.2286	5.67353	5.60111	3.64822	3.25886	3.1999	4.42651	6.32284	low
TCGA-CN-A6V6	0.641096	0	4.30531	4.00883	4.59592	5.02881	3.62152	4.77832	4.55839	3.33529	6.48786	5.89035	5.02195	1.56496	4.90689	5.08395	6.9701	5.18604	5.68336	3.39761	5.80756	6.38215	2.66644	3.85443	3.99322	4.27016	5.65387	low
TCGA-CR-6492	1.31233	0	4.99949	4.26912	6.39633	3.59719	3.94981	5.75667	4.99648	2.92304	6.76625	6.63891	5.00124	1.4835	4.54763	4.91502	6.54357	5.62868	5.48747	2.97675	5.44903	5.93097	3.42006	3.32832	3.43592	3.82729	6.60997	low
TCGA-CQ-5334	0.353425	1	5.38204	4.42831	7.03	3.6923	2.53243	5.3559	5.0871	2.79151	6.60445	6.99548	5.1173	1.3816	4.80395	4.78662	6.2892	6.36576	5.28428	3.04925	5.96975	5.16974	3.8814	3.26701	3.23205	4.20571	6.57019	low
TCGA-P3-A6T8	1.09589	0	4.16622	4.03053	5.20572	3.47846	3.91204	4.74818	4.66495	3.6318	6.67515	5.42034	5.00902	2.21975	5.19454	5.03385	6.23982	5.51916	6.05872	2.5001	5.51901	5.83893	3.95744	3.12952	2.73429	4.18787	6.49437	low
TCGA-CV-A465	0.589041	1	4.65991	3.8655	6.6581	3.61689	3.96831	5.06029	4.82207	2.78665	7.39658	7.13837	5.00073	2.47927	5.13923	4.91122	6.59777	5.49867	5.12726	2.87151	5.67109	6.03208	3.63354	3.0476	3.21456	4.71334	6.78402	high
TCGA-P3-A6T3	1.58082	1	3.81282	3.55405	7.71699	3.40354	3.56121	5.30799	7.58268	2.74005	7.60189	7.12114	5.63045	1.41993	4.66953	5.60002	6.03822	6.07002	5.67886	2.62421	6.2625	5.20721	4.04843	3.38669	3.58535	4.10808	6.43423	low
TCGA-CN-6992	2.92055	0	5.10005	4.07311	5.23968	3.71661	4.10412	6.47117	6.28859	3.26666	6.92214	6.80847	5.46531	1.66191	5.07269	4.47313	6.67379	6.47712	5.86034	3.03094	5.06449	6.98085	4.51568	3.4466	3.69635	4.54418	7.25108	high
TCGA-CV-5977	5.0411	0	3.95047	3.61506	5.34879	4.47554	3.94246	6.11386	5.60237	2.79396	8.41073	7.25542	5.27718	1.42088	4.85252	6.25291	6.41745	6.26531	5.90221	2.63936	6.24307	6.06888	4.88999	3.36514	3.8625	3.94976	6.65999	low
TCGA-CV-6951	2.50685	1	4.71625	4.03753	5.86744	3.7242	4.23724	6.4171	5.4229	2.67996	6.73581	6.42515	4.58164	1.57352	5.00164	5.01556	6.80621	6.20206	5.54909	3.66361	5.93159	5.98349	4.59091	3.49162	3.04963	4.30005	7.52839	high
TCGA-UF-A71E	3.50137	0	3.97183	4.16728	5.39475	3.58353	3.75637	5.17695	9.16261	2.85794	6.95554	6.4265	5.05526	3.68562	5.04919	5.01536	7.09468	5.80616	6.01612	3.44907	6.85448	6.41312	4.26856	3.86152	3.50966	4.2333	7.00142	high
TCGA-CN-A497	2.07123	0	5.31706	4.94353	6.50883	4.41169	2.15694	6.02959	4.93519	3.86707	6.84092	6.80602	5.24039	1.64125	6.06154	4.85789	6.22324	6.08638	6.32358	3.37621	5.68361	6.09074	4.11608	3.62629	3.77871	4.05815	6.22312	low
TCGA-BA-A6DJ	1.11507	1	4.76635	4.04898	7.06021	3.69359	4.26008	6.05045	5.14615	3.57419	6.68879	6.7512	4.64802	1.41098	4.78971	4.93567	6.48036	5.03412	5.75165	2.74471	5.58581	5.60611	3.93237	3.20813	3.36804	4.08688	6.91546	high
TCGA-CR-6493	0.772603	1	4.40513	3.15816	6.87531	3.81641	4.3069	6.85996	5.7139	3.17457	7.546	7.45445	5.46932	1.30909	5.38792	5.08597	6.39043	6.48449	5.85407	3.13451	5.68375	5.15446	4.47375	3.22304	3.68941	4.4673	6.9009	high
TCGA-CV-6937	1.70959	1	5.06177	5.0024	3.91345	3.12416	2.85538	6.28098	5.35243	3.34868	7.64168	6.91669	5.58029	2.62493	5.35743	5.04278	6.66483	6.36014	5.57945	2.76678	5.35664	6.82977	5.34628	3.19395	2.55208	5.07988	7.65141	high
TCGA-MT-A67D	0.153425	0	4.3108	3.81759	5.09617	4.01557	3.35454	5.88934	6.97664	2.96	6.91418	7.33102	5.02391	1.59336	5.17403	5.72068	6.47749	6.43571	6.04739	3.13199	6.22777	5.43171	4.21537	3.39838	3.35518	4.81909	7.14091	high
TCGA-CQ-7068	2.64658	0	5.12887	4.15993	6.74763	4.0334	4.03074	5.97324	4.98687	3.47934	7.70944	6.62392	4.92467	1.28985	4.98252	5.31161	6.651	6.50838	5.79312	2.98692	5.56476	5.54108	3.8392	3.43867	3.30547	4.22389	6.77008	high
TCGA-CR-6472	2.87671	0	4.77304	4.01304	5.01246	3.85453	3.20341	5.41784	5.44961	2.93485	6.82084	6.54296	5.25814	1.51398	5.94865	4.69594	6.8517	5.12925	6.47889	3.7057	5.3344	6.27857	3.00971	3.72303	3.60097	3.49354	6.36474	low
TCGA-CQ-5329	3.89589	0	4.39817	3.78419	6.0201	3.83086	4.41986	4.98358	5.9446	2.8455	7.87078	6.4607	5.88119	1.36915	5.00114	6.90622	6.86188	6.13664	6.28127	3.46054	5.69383	6.06787	3.49585	3.12166	2.58267	3.99733	6.79302	high
TCGA-CQ-5325	1.79178	1	5.53564	4.57047	6.70793	3.22644	3.91933	5.66866	5.13447	2.94033	7.41406	6.50441	4.90121	1.49602	4.6113	5.00405	6.52769	5.84855	5.21861	3.18946	5.48438	6.11467	3.30388	3.10163	3.26502	3.99845	6.77608	high
TCGA-P3-A6T4	0.169863	1	4.13072	4.21792	5.36386	3.94366	3.07571	4.98313	6.1827	2.96046	6.31345	6.53395	5.875	2.6362	5.29747	5.66225	6.3488	5.8459	5.89452	3.26094	6.02145	6.22455	4.305	3.47654	2.9032	4.05934	6.3378	low
TCGA-IQ-A61J	2.79726	0	3.99927	3.81773	5.7702	3.82868	3.96077	4.93533	4.96619	2.85503	6.56596	6.02433	4.52769	1.78619	4.59104	4.766	6.15897	5.54072	5.0165	2.51575	5.66322	5.34704	3.04351	3.09976	3.04887	3.93421	6.30643	low
TCGA-BA-A6DB	0.591781	0	4.70413	4.35617	5.00883	3.54114	3.70273	4.96936	4.85479	3.01947	6.96081	6.48467	4.72943	2.14173	4.69478	5.30625	6.47532	5.78839	5.60569	2.92771	5.68106	5.83989	3.26181	3.26539	2.7914	4.23883	6.69056	low
TCGA-CQ-6221	2.73973	0	3.83789	3.34331	4.89208	2.90701	4.3667	3.7256	5.06973	2.80533	5.89252	6.04523	4.34776	1.31013	4.50984	3.97816	7.07768	5.77078	5.00057	2.44457	5.64357	6.14008	2.65456	3.01871	3.12179	3.59565	6.94302	high
TCGA-D6-6515	1.10411	1	4.81405	4.29117	5.99559	3.19822	3.6476	5.51316	4.3565	3.18974	6.33776	6.20833	5.27977	2.01548	4.69736	4.72505	6.73985	6.04079	5.23679	2.95135	5.42849	5.28512	3.04185	3.33567	3.04566	3.77917	6.19961	low
TCGA-CR-7365	3.26301	0	4.90794	3.73953	6.42136	3.09118	4.67337	5.71218	4.519	2.26089	6.62989	6.69496	4.8736	1.70924	5.19155	4.94802	6.68025	6.11472	5.4647	2.65135	5.03305	5.32608	3.97193	3.14151	3.29248	3.88927	7.0905	high
TCGA-BA-5558	4.48219	0	5.52532	4.25635	7.05972	4.12022	3.72656	6.05582	5.80911	2.57688	7.14082	6.98589	4.58099	1.76154	4.85867	4.7913	6.21121	5.43091	5.97473	2.89641	5.31229	5.05858	3.92015	3.24296	3.92737	4.09959	6.62667	low
TCGA-F7-A50G	1.68767	0	4.19115	3.60221	6.52795	3.78216	3.83586	4.84283	3.76885	3.25278	6.7504	5.97405	4.95695	2.0617	4.07944	4.7135	6.16965	5.07188	4.90595	3.06379	5.3415	5.4781	3.33704	2.91194	3.28998	3.86177	5.396	low
TCGA-CQ-6224	3.69863	0	4.48508	3.75966	6.73571	2.80679	4.38786	5.29823	4.21474	2.69293	7.02626	6.32569	5.00164	1.7516	4.71559	5.02502	6.47982	5.58159	4.96226	2.6125	5.44107	5.64117	3.51416	3.15834	2.61683	3.84417	6.77726	high
TCGA-UF-A719	4.55616	0	4.98647	4.25531	5.30913	3.95778	3.47955	6.10876	5.21335	3.08344	7.6679	7.11235	4.96766	2.32427	4.87609	5.09565	6.09654	7.12183	5.81728	3.8432	6.10274	5.8351	4.52949	3.6735	3.49833	5.09475	6.6801	low
TCGA-CQ-A4CI	2.60274	0	5.25962	4.5099	5.32748	4.20862	4.11535	6.27504	5.75322	3.11973	7.71801	7.19576	5.47443	2.15825	4.68125	5.69499	7.10368	5.98884	5.65839	4.0679	6.38825	6.52132	4.6452	3.80597	4.30222	4.83729	6.63124	low
TCGA-CV-A6JN	2.48219	0	3.1619	3.72132	5.90323	5.07064	2.68809	5.29761	6.80607	3.4303	7.9033	7.68562	4.59459	1.62994	3.61993	5.54262	6.85269	5.98205	5.49759	3.0113	4.76222	5.68053	4.81146	3.05311	2.86711	4.65349	6.54	low
TCGA-T3-A92N	0.260274	1	4.55622	4.05771	5.80655	3.7234	4.11946	5.74862	4.70778	3.80973	7.87808	7.24071	5.81132	1.85763	5.02417	5.79689	7.47984	5.86151	6.44396	2.73087	7.89403	5.67016	5.27458	3.39982	3.18934	4.92266	7.9185	high
TCGA-BA-A6DL	1.70685	0	4.39093	4.25436	6.17386	4.45744	3.61801	5.81116	5.41078	3.93072	7.60104	7.06554	4.91894	1.77973	5.14787	6.03573	6.28513	6.17051	6.12425	2.76404	6.60491	6.44857	3.75314	3.28489	2.94475	4.69324	7.10459	high
TCGA-P3-A6T2	5.93151	0	4.96271	3.90589	6.97831	3.66735	4.74918	5.6116	4.91973	3.00925	7.51691	6.51206	6.21929	1.30216	5.05606	5.24353	6.57071	6.43415	6.08827	2.54115	5.73359	5.84211	3.48498	3.1836	3.31962	4.45514	7.01788	high
TCGA-D6-A74Q	0.926027	0	4.3851	4.12756	5.99999	4.11067	3.33229	5.94497	5.40703	4.13114	7.07652	6.98448	5.18019	3.70573	5.07561	5.91686	6.80624	6.55478	6.17362	3.56489	5.9741	5.89546	4.49326	3.8138	3.60866	4.65484	5.76508	low
TCGA-CN-4725	3.16986	0	5.24118	3.91798	7.65218	3.17209	4.32785	5.91764	4.67665	2.85256	6.29946	6.8348	5.09808	1.79416	4.82832	5.00775	6.98924	6.21094	5.45967	2.7694	5.87791	5.40211	3.84394	3.21639	3.38135	4.17205	7.10874	high
TCGA-QK-A8Z8	0.468493	1	5.42201	4.58967	5.52915	4.0234	1.61981	5.81682	5.3885	3.49412	6.81131	6.76536	5.0033	2.31302	5.27841	5.0662	6.3855	6.48074	5.60894	3.45994	6.35372	6.15709	3.70512	3.39695	2.89128	4.25652	6.38195	low
TCGA-CV-7253	0.989041	1	4.69655	3.8502	6.84379	3.32825	3.96857	6.38005	5.11542	2.89225	6.32623	5.69137	5.00529	2.43222	5.36556	5.22033	6.43653	5.04359	6.06627	2.84082	5.49299	6.31116	3.89411	3.07667	2.75351	4.06764	6.98883	high
TCGA-CR-7367	3.94521	0	5.19135	3.81289	5.79268	3.17402	3.86058	5.64384	5.10515	2.86353	6.74837	6.49115	4.83026	1.73615	5.18514	5.15199	6.50687	5.78575	6.03939	2.94336	4.91638	4.87708	3.59113	3.12489	3.73742	4.11515	6.28078	low
TCGA-HD-8635	1.90411	0	5.57942	4.26091	5.76961	3.56897	3.88419	4.70587	4.37355	2.92965	7.3917	5.50525	4.95352	1.50852	5.14222	4.86357	6.52872	5.81462	5.63406	3.28702	5.78368	5.69568	4.4819	3.24193	2.91971	4.07834	6.78799	high
TCGA-CQ-6220	2.69863	1	4.5216	3.60045	6.34924	3.23225	3.67873	5.89405	5.01304	2.80631	6.39356	6.68823	4.74721	1.33085	4.56189	4.92964	6.56063	5.78916	5.48569	2.55119	5.80016	6.29981	3.25357	2.94749	3.10339	4.31427	7.19416	high
TCGA-IQ-A61O	1.15342	1	3.41011	3.68078	5.44401	2.94477	3.64687	5.30026	4.21362	2.66435	5.81027	5.51023	4.20765	1.86638	4.11417	5.10261	6.58806	5.29359	4.65184	2.28674	5.63998	5.31559	3.17186	3.19267	2.36266	3.65695	6.46424	low
TCGA-BA-4076	1.13699	1	3.91391	3.44608	5.21562	3.79283	4.03482	6.18712	8.17764	3.15638	5.86508	6.9578	5.50259	1.35419	3.76458	4.77768	6.53492	5.11647	5.59849	2.63409	7.10455	6.40147	3.7076	2.93464	3.35948	4.36807	7.53528	high
TCGA-BA-6872	1.05205	1	3.86876	3.44725	6.44403	3.79467	3.70047	5.66966	5.87325	3.34816	7.31535	6.79375	4.61254	1.43358	4.06681	5.50021	6.42652	6.15042	5.47137	3.43352	5.73639	5.47091	3.98583	3.13561	3.3936	4.25299	6.24537	low
TCGA-CN-5366	0.986301	1	4.04163	3.28209	6.72487	3.48378	4.45683	5.27709	5.30074	2.70809	7.08131	7.3084	5.35961	1.40444	5.34925	5.56499	6.6181	6.01832	5.61737	3.04216	6.37145	5.88455	4.35599	3.1316	2.97158	4.3215	7.42651	high
TCGA-CV-5441	7.90685	0	4.02553	3.47224	7.02915	4.40723	3.31684	6.94792	5.71764	3.53051	7.60763	7.10537	5.48575	1.58301	5.04754	5.28931	6.94694	6.05149	5.84526	3.899	5.57056	5.46843	4.83218	3.43878	3.74473	4.4493	6.28876	low
TCGA-P3-A6T5	2.41644	1	3.57992	3.2228	6.2632	4.09607	3.65263	5.95869	5.64218	2.72367	6.78357	6.22215	4.39314	4.08096	4.30264	4.76145	6.48374	5.87209	5.29021	3.54892	5.42298	6.30158	3.96342	3.16799	3.55441	4.36626	5.70323	low
TCGA-CN-6020	0.561644	1	4.58784	3.73721	5.85473	3.40735	3.29696	5.33713	5.50482	2.301	6.66402	7.00205	4.76737	1.63121	4.98718	4.29259	6.71986	5.71319	5.57894	3.13949	5.11198	5.90922	3.37346	3.42866	3.67447	3.98245	6.62433	low
TCGA-CR-7364	3.93151	0	5.56059	4.5375	5.26669	3.44313	3.48633	5.07986	4.76895	2.69575	6.67563	6.65923	5.17757	1.49102	5.03181	5.16195	6.95782	5.2892	5.8202	2.63563	6.17706	5.56574	3.15105	3.36303	2.80737	3.7766	7.20949	high
TCGA-CV-6950	1.25753	1	4.52579	3.65616	5.97406	3.43812	4.36035	5.43667	6.47727	2.99636	7.1735	7.12879	5.13366	1.41955	4.74869	5.38804	6.29999	6.32244	4.99202	2.96411	6.02965	5.38994	4.00702	3.58759	3.2447	4.20212	6.71696	high
TCGA-CV-5435	6.35342	1	4.53801	3.84773	5.4831	3.20724	4.27661	6.22448	4.88299	2.85993	6.58818	6.53955	4.9359	1.36754	5.578	4.7914	6.86119	6.02974	5.58653	3.34312	5.69152	5.68518	4.07869	3.64345	3.53258	3.89433	7.02259	high
TCGA-CV-6960	2.36164	1	5.62334	5.09182	7.25014	3.81563	4.37693	6.2095	5.48271	2.52134	8.0624	6.99609	5.42783	2.06539	5.26257	5.51751	6.08962	6.57706	6.00328	3.31591	6.26403	5.33876	4.7033	3.04205	3.63134	4.33986	7.30958	high
TCGA-CR-7383	1.4274	1	4.18069	3.74113	5.58455	3.54503	3.53757	5.74415	5.59641	2.75412	7.46912	6.94247	5.08167	1.62655	4.768	5.90836	6.64032	6.98018	5.59618	2.97549	6.14879	5.77806	4.45507	3.44314	3.16901	4.56675	6.97426	high
TCGA-H7-A76A	1.74521	0	3.3338	3.97987	5.13195	4.25142	3.04034	5.42387	4.62805	3.60172	6.07077	6.19994	4.29314	2.22055	4.20602	4.69269	6.63584	5.58315	5.167	3.39256	4.92024	6.026	3.08091	3.53555	3.38722	4.03961	5.48985	low
TCGA-KU-A6H7	1.03562	0	3.41391	3.96141	4.42168	4.72563	2.35266	4.84142	6.32432	3.14616	6.53814	6.93039	4.90993	1.44156	3.59973	5.61104	7.14308	6.11547	5.11149	3.84796	5.61695	6.64431	3.35882	3.50198	3.3009	5.0585	6.10344	low
TCGA-D6-8569	2.10959	0	5.26648	4.03988	4.93052	4.22792	4.10877	6.33534	4.68608	3.08561	6.93452	7.20894	4.78377	1.41633	4.64619	4.33351	6.76914	6.38929	5.30679	3.22484	5.28462	6.25816	3.92828	3.35113	3.55777	4.54669	7.1454	high
TCGA-QK-AA3K	0.693151	0	4.0632	4.6154	5.3585	3.58898	4.87408	4.98339	8.1469	3.33974	6.95856	6.92969	4.92608	2.40711	4.71342	5.7521	6.58975	6.38758	5.87271	3.46705	5.89944	5.60306	3.8985	3.58063	3.32091	4.18749	6.95072	high
TCGA-D6-6517	0.8	0	4.67709	3.9134	6.7808	3.6635	3.77274	5.78848	5.04207	3.1131	7.26608	7.15216	5.11028	1.41275	4.4572	5.0049	6.75236	6.28937	5.37056	3.14473	5.6273	6.08863	4.07909	3.11799	3.31454	3.96416	6.83346	high
TCGA-CN-5356	2.86301	0	4.82876	3.84195	6.64312	3.13621	3.32817	5.72953	4.62879	3.09849	7.01221	7.15886	5.56507	1.58253	5.56826	5.70348	6.59517	6.29929	6.26792	2.64031	5.87405	5.06379	4.19268	3.56667	3.45786	4.42104	6.65214	low
TCGA-CR-7382	2.18082	0	4.96654	3.92448	5.51705	3.35444	4.4844	5.25466	4.43122	2.89205	7.35459	5.74988	4.97927	1.61245	4.84696	4.76456	6.47149	6.14524	5.39586	2.84543	5.74188	4.89045	3.64773	3.27706	3.32514	3.6764	6.36732	low
TCGA-CV-7102	0.153425	1	4.17329	3.71588	5.84361	3.32785	3.73352	5.7166	7.14822	2.54329	6.40185	6.89869	4.92423	1.40613	4.43738	5.0959	6.73872	5.8919	5.44116	2.67446	5.36693	5.57397	3.87638	3.18852	2.83438	4.21636	7.35148	high
TCGA-D6-A4ZB	1.03014	0	4.66901	4.25858	5.09742	4.41994	3.41745	5.30622	5.15246	3.56771	6.90936	6.48382	5.15228	2.86621	5.01938	5.26258	6.63056	5.32886	5.59049	3.35278	5.77806	6.1395	4.38826	3.49917	3.48515	4.63662	6.03494	low
TCGA-BB-A5HZ	2.26575	0	4.93504	3.78838	5.53779	3.75239	2.7381	6.37068	5.28214	3.8747	7.57786	7.11584	5.18034	1.78319	5.11388	5.39051	6.39037	5.31404	6.20332	2.69732	5.87243	4.99569	5.14392	3.06588	3.03884	4.57376	6.72903	high
TCGA-CN-A63T	0.616438	0	4.52492	4.31227	5.91887	3.57569	3.86526	6.76511	5.53615	3.28793	7.94895	6.93915	5.14967	1.74842	4.84194	5.83507	6.81663	6.18346	5.63859	2.70349	6.16156	6.49039	4.36601	3.46171	3.00251	4.82022	7.54143	high
TCGA-CV-7406	4.78904	1	4.4565	4.11375	5.72076	3.26872	3.98383	5.79575	4.69737	2.62013	6.64318	6.29751	4.94798	1.80204	4.67553	4.3213	6.79581	5.37407	5.46932	3.09648	5.17232	6.33193	3.05258	3.35031	3.68072	3.89389	6.55607	low
TCGA-CQ-A4CH	1.01644	0	5.17521	4.43831	5.79204	4.2982	4.14824	5.23246	5.09218	4.12725	8.06625	6.84316	5.41798	1.33241	5.48912	5.09694	6.65472	5.63105	5.88157	3.26802	5.83061	5.6162	3.31987	3.49494	3.65556	5.08117	6.53857	low
TCGA-D6-A6EO	1.19178	0	5.64029	4.69113	6.5733	4.35126	3.46641	5.42231	5.66759	3.88066	7.66386	7.14979	5.07832	1.5013	5.52288	5.26616	6.47537	6.1926	5.95861	3.57682	6.24155	6.37394	4.52119	3.31706	3.58958	4.39212	6.93616	high
TCGA-D6-6827	1.55616	0	5.62893	4.96498	5.33998	4.26284	4.03568	5.36748	5.66175	3.55738	6.86342	5.84492	4.88133	1.76789	5.47307	5.54025	6.59024	6.85462	6.49692	3.73767	5.71482	6.29887	3.87223	3.77416	3.70235	3.80262	6.5142	low
TCGA-HL-7533	2.89589	0	3.71184	3.42192	7.08195	3.79771	3.69398	6.60466	5.01077	2.85685	6.35937	6.43652	4.92281	1.42323	4.81597	5.06011	6.60462	6.17966	5.5039	2.97692	5.70434	6.63108	3.75233	3.09241	3.49561	4.29452	6.87561	high
TCGA-CN-4729	1.07397	0	3.86489	3.13703	5.65366	3.09328	3.44893	5.47347	4.53313	3.03936	6.47403	7.06566	5.13817	2.08937	4.29271	4.75868	6.77374	5.83579	5.02426	2.14157	5.54997	5.27123	3.92123	3.07213	3.37727	3.80356	6.16687	low
TCGA-CN-6995	0.306849	1	4.34687	3.62424	5.68553	4.16795	3.57496	6.46525	8.21024	2.98005	7.31343	7.76522	5.11031	1.33399	5.0068	4.72753	6.97443	5.89537	5.67249	2.87108	5.54743	6.84617	4.53026	3.35554	2.60927	4.62027	8.29587	high
TCGA-CV-7425	4.70685	1	5.04173	4.02532	7.30109	3.19129	2.98518	5.34841	4.3044	2.6462	6.5058	6.80399	4.84794	1.90589	4.5814	4.4653	6.56505	5.70728	5.4384	2.65906	5.47077	5.37306	3.08097	3.12276	3.39895	3.96424	6.35639	low
TCGA-UF-A7JK	1.16164	1	4.5967	4.47537	6.19269	3.51357	3.1949	5.09523	4.6662	2.92951	6.95325	6.76713	5.60882	1.60244	4.83617	5.67297	6.6785	6.05595	5.56005	2.85191	6.26983	6.15029	4.16419	3.2502	2.84463	4.28781	6.9842	high
TCGA-CV-7248	1.4274	1	5.50566	4.87153	6.41065	3.60998	4.10709	5.65419	5.22132	2.83713	6.40017	6.65932	5.59584	1.72264	5.74789	5.31436	7.03249	6.25072	5.94271	3.50355	5.98952	5.96047	5.39397	3.56174	3.55754	4.09221	7.4233	high
TCGA-CN-5370	0.709589	1	4.86496	4.25203	7.15839	3.9098	4.10435	5.71526	4.96678	2.68793	6.84265	6.19548	5.05902	1.47789	5.15278	5.01506	6.3553	5.58692	5.81227	2.69178	5.87175	5.28108	3.6641	3.22949	3.10564	4.06558	7.03019	high
TCGA-CV-7178	5.93425	1	5.08037	4.06209	5.77208	4.38333	3.31653	4.77764	5.79965	2.9173	7.70719	6.28038	4.23811	1.84587	4.7863	6.01528	6.54795	6.50695	6.04547	3.15275	5.76048	6.01457	5.09892	3.40631	3.35417	4.65993	6.73259	high
TCGA-CV-7429	0.293151	1	5.22366	4.70319	6.38713	2.98994	4.82364	6.61318	5.5907	3.14237	6.96912	6.42547	6.08882	1.3202	5.25269	5.61339	6.97892	7.87715	6.69174	2.93679	6.2954	5.89997	4.3077	3.21842	2.95471	4.33181	8.25197	high
TCGA-BA-A6DE	1.20548	0	5.48176	4.06479	6.35269	4.37909	3.95405	5.84582	5.61038	3.02592	7.37036	7.19304	5.16699	2.36774	4.70447	5.34234	6.49454	5.69324	5.32549	3.2454	6.16395	5.74437	4.67954	3.4309	4.13636	4.22469	6.19461	low
TCGA-CV-6436	5.20274	0	3.92676	4.10978	5.97259	2.93221	3.11182	5.14406	5.67111	2.52047	7.11379	7.57438	5.15891	1.4145	3.94894	5.23538	6.80901	6.12711	5.24001	2.89101	4.25933	5.02541	3.86818	2.48129	2.68162	4.33164	6.87647	high
TCGA-UF-A7JJ	1.34247	0	4.54148	4.52187	5.30935	4.06889	3.46541	4.9418	5.68252	3.41283	6.73415	6.42489	4.79065	2.34086	4.9275	4.96096	6.42689	4.91069	5.77179	2.9783	5.6397	5.36321	3.94516	3.06498	2.84329	3.92386	6.56027	low
TCGA-CQ-6225	1.10411	1	5.33924	4.18457	4.99849	4.07322	3.78239	5.50174	6.16966	3.0376	7.49909	7.11949	4.83643	1.7295	5.27262	5.9276	6.86682	5.35311	6.17403	2.88691	6.00338	6.8005	4.21355	3.38698	2.87493	4.97835	7.7842	high
TCGA-CV-A6K1	1.87671	0	4.23362	4.713	5.52388	4.32289	2.83622	3.97267	5.41105	3.82887	6.64039	7.14008	5.39601	1.7366	4.17069	5.19904	7.31961	6.71715	6.5582	3.13392	4.38008	6.25175	4.65118	3.30972	3.33453	4.99728	6.60795	low
TCGA-IQ-A61H	3.11781	0	4.89345	4.14758	5.47256	3.80884	3.71292	5.864	5.5994	2.73097	7.19207	6.29053	5.5907	2.02439	5.13784	5.38708	6.63271	5.49405	5.75331	3.28149	6.24731	6.4586	3.91385	3.72126	3.24465	4.31898	6.75516	high
TCGA-BB-A6UO	0.734247	1	3.89312	3.7057	4.9778	3.76186	3.2492	6.09472	6.22502	3.17178	8.04721	7.18837	5.2336	1.60488	4.74125	5.97872	6.72334	6.15272	6.01447	2.36929	5.85026	5.63572	4.30048	2.92049	3.13449	4.67138	7.10169	high
TCGA-CV-6948	3.53151	1	6.03583	4.95582	5.90487	4.2073	4.00793	5.74234	5.61038	2.94702	8.33969	7.08142	5.46078	1.89196	5.59458	5.97659	6.92425	6.42305	6.3885	3.39886	6.0892	6.71921	4.6193	3.69581	3.37478	4.67089	7.55849	high
TCGA-CQ-5327	4.54795	0	5.00912	4.1042	5.66413	3.46984	3.83434	6.11983	5.03359	2.92111	7.34527	7.12139	5.35705	1.33126	4.86742	5.5528	6.72056	6.02008	5.77799	2.85653	5.38935	5.59379	3.53035	3.23995	3.13122	4.48676	7.01368	high
TCGA-BA-A4II	2.51507	0	4.6746	3.92349	6.91545	4.72745	3.47533	6.57359	8.82343	2.97521	8.05288	6.95773	5.11923	1.39368	5.43034	5.56207	5.89051	5.99637	6.10647	2.81101	6.00352	6.80184	4.48733	3.4352	3.82815	4.10359	7.03715	high
TCGA-CN-A49C	1.24932	0	3.90955	3.73728	6.44433	5.23696	3.57787	6.08893	7.24925	3.75867	6.30545	6.3295	4.97493	1.60834	4.85067	5.19855	6.58728	5.7574	5.03603	3.04529	5.89886	6.9175	2.58977	3.38155	3.63855	4.19988	6.12012	low
TCGA-IQ-7632	1.20822	0	5.01025	4.44336	5.69095	3.33722	2.99403	5.07482	4.23946	2.43223	6.36241	6.86477	4.28695	1.3997	4.92248	5.06906	6.57251	5.96525	5.87382	2.7764	5.45493	5.57674	3.5491	3.00868	3.07147	3.9541	7.12841	high
TCGA-BA-A6DD	0.473973	1	4.23751	4.20541	6.03749	4.04104	3.9504	6.1855	4.63435	2.99919	7.18177	7.04697	5.31031	1.6856	4.3495	5.36583	6.8172	5.97054	5.54434	2.66934	5.49531	6.29588	4.7608	3.16582	2.98261	4.09342	7.21308	high
TCGA-QK-A6V9	2.28219	0	4.20985	3.99358	5.59303	4.61753	3.31842	5.03456	4.90206	3.05617	6.66287	5.69046	5.30434	1.53153	5.01623	5.34841	6.58397	5.76898	5.44738	3.6601	5.79514	6.49779	3.02779	4.13401	4.23186	4.35721	5.24632	low
TCGA-BB-8596	5.92055	0	4.56346	3.93653	5.53505	3.54834	3.7229	5.64992	4.71673	2.96476	6.45439	6.26796	4.21893	1.99991	4.64518	4.8289	6.25812	5.88566	5.02027	2.81483	5.71222	5.52923	3.48672	3.50896	3.28656	3.96497	6.29583	low
TCGA-CR-6491	1.89863	0	3.80584	2.7328	6.22539	3.87792	3.98479	6.59474	6.59377	2.40209	6.67535	6.41502	5.10559	1.36157	4.53325	5.78074	6.74594	5.72229	5.55544	2.77867	4.56088	5.16888	3.97805	2.96294	3.4828	4.0981	6.28088	low
TCGA-D6-6826	0.953425	1	5.16571	4.20226	7.34708	3.4893	3.78778	5.21891	5.16087	2.59346	6.81465	5.653	4.59824	1.66443	4.96945	4.66535	6.8572	5.50552	6.06212	2.61142	5.52163	5.21359	3.79007	3.15652	3.07478	3.70077	7.05319	high
TCGA-BA-5153	4.8274	1	4.55746	3.36065	3.56072	3.50101	4.14678	4.95609	4.04304	2.99712	5.89576	5.34899	4.62802	1.39397	4.74534	4.61419	6.47992	5.71386	5.11273	3.42635	5.78051	6.58939	2.72646	3.89462	3.36469	4.23959	6.01654	low
TCGA-CQ-5333	0.934247	1	4.67607	4.64993	5.37802	4.10446	2.21066	6.03252	5.56121	3.12483	7.04825	7.57716	5.1749	1.36292	4.10441	5.21278	6.65481	6.86504	5.20051	3.37339	5.54861	5.98731	3.92086	3.1294	2.58533	4.18671	6.92425	high
TCGA-WA-A7H4	1.2137	0	5.13275	4.47888	5.76941	3.92369	3.99139	4.70664	4.74848	3.19522	6.9791	6.3337	4.92541	1.95987	5.41662	5.3436	6.61416	5.99219	5.78892	3.38856	5.82376	5.53414	4.28352	3.51238	3.22811	4.0957	6.58459	low
TCGA-CV-A468	1.27123	1	4.73707	4.48864	5.59246	3.78063	3.93651	5.64305	4.88642	3.53551	6.89184	6.69331	4.9577	2.01787	4.87782	5.35581	6.29664	5.71718	5.61505	3.07275	5.45743	5.44681	3.6135	3.24929	3.47532	4.17432	6.20851	low
TCGA-BA-4078	0.756164	1	4.32876	3.5662	4.54832	4.67689	4.57594	4.1533	5.06151	3.0985	6.37265	6.1102	4.74583	1.79717	4.42424	4.49471	7.01542	5.97845	4.97681	3.61622	5.20572	6.21338	3.18339	3.88413	3.60084	3.82852	5.79143	low
TCGA-CV-7430	1.35616	1	5.00833	4.59735	6.09115	2.66734	4.68142	6.12608	5.24343	2.49481	6.67367	6.482	6.0184	1.33079	5.43051	5.26191	7.06341	6.0432	6.17828	2.74837	5.83301	6.80708	3.70225	3.32763	2.99664	4.0563	8.09734	high
TCGA-CN-A63V	1.32603	0	4.42817	3.77293	5.00498	3.64637	3.46825	6.20822	4.39581	3.55294	7.35342	6.60212	5.25485	1.8588	4.56866	5.52938	6.72732	6.14249	5.93711	2.86487	5.1503	5.5145	4.47362	3.22431	3.61169	4.12668	6.04045	low
TCGA-CN-6994	2.0137	0	4.54877	3.77906	5.51473	3.51087	4.23545	6.59419	8.06206	2.78826	7.14182	6.30203	5.47917	1.60409	5.01463	5.54373	6.48914	5.53066	5.22408	2.75455	5.39699	5.71351	3.52745	3.06538	3.34823	4.1397	6.78209	high
TCGA-CV-5432	10.7671	0	3.71731	3.18776	5.81583	3.31735	3.73255	6.08929	5.17589	3.17515	7.92184	6.81719	6.20142	1.39532	4.72054	6.44641	6.66425	6.36193	5.84984	3.23368	6.29225	5.9058	4.61519	3.62311	2.77359	5.27753	6.78084	high
TCGA-CR-7385	2.73151	0	4.48296	3.96402	5.33035	4.24845	3.46695	5.43499	5.1508	3.15457	6.4249	6.22754	4.85921	1.54482	4.91097	5.0381	6.56774	5.78983	5.25057	3.36944	5.84631	7.00722	2.18696	3.26105	3.89328	4.11618	5.99451	low
TCGA-CN-5374	4.74521	1	4.38151	3.72915	4.28464	4.12809	3.9581	6.3555	4.82111	3.02023	6.43178	6.42367	4.86119	1.80953	4.48521	5.51246	6.51851	5.60692	5.80134	3.45819	5.59009	6.75065	2.95533	3.48194	3.7127	4.24383	6.18738	low
TCGA-CR-7399	0.49589	0	4.48287	4.28012	5.21371	3.59499	4.15624	6.62437	5.12688	2.9747	6.89924	7.29511	5.29675	1.26265	4.71687	5.43372	7.37423	5.66741	5.58889	3.45606	5.5274	5.88704	4.36374	3.85882	3.47374	3.63975	7.01401	high
TCGA-MT-A51W	1.19726	0	4.40179	3.7899	6.56555	3.71826	4.23492	6.18733	6.00583	2.91711	6.64336	6.79177	4.93792	1.48685	4.26287	4.89998	6.51638	5.62403	5.50121	2.69673	5.62271	5.38084	3.67793	3.05533	3.37423	3.88793	6.87204	high
TCGA-BA-6873	0.334247	0	4.83016	3.81164	7.25588	3.68824	4.23654	5.5275	5.14347	3.408	7.48436	6.39938	4.65859	1.32569	5.21837	5.33134	6.21891	6.17005	6.06096	2.96733	6.06744	5.32892	4.05244	3.16406	3.33112	3.86122	6.77114	high
TCGA-CQ-A4CB	2.44658	0	4.36515	3.68697	6.37695	4.96216	3.79052	5.81669	4.46991	3.16729	7.81266	6.82177	5.49633	1.51751	5.16887	5.54643	6.81054	6.48093	6.26129	2.95577	5.76636	5.83543	4.04579	3.38675	3.40803	4.47982	6.66957	low
TCGA-IQ-A61G	0.986301	0	4.80686	4.68462	6.60051	4.09835	3.19443	5.59975	9.27781	2.65018	7.68168	7.22927	6.6325	1.64259	4.56922	6.41979	6.74141	6.28543	5.61167	3.08139	5.73548	6.89041	4.69052	3.65327	2.67675	4.9421	7.39552	high
TCGA-CN-6023	3.0411	0	5.06576	4.33646	5.42152	3.54364	4.05634	5.62106	4.90611	3.22959	6.50048	7.08271	5.37015	2.04224	5.12413	5.1829	7.19105	6.34749	5.55437	3.32127	5.39229	6.78632	3.93205	3.66411	3.75172	4.59455	6.81549	high
TCGA-DQ-7592	1.4137	0	4.87414	4.03203	7.24944	3.58413	4.37423	5.21724	4.96155	2.77853	7.11397	6.5151	5.53509	1.36796	4.8201	5.08134	6.39339	5.30812	5.88005	2.75924	6.04806	5.71861	3.58605	3.3712	3.52458	4.34141	6.79084	high
TCGA-CV-6954	5.48493	1	4.99728	3.86487	5.97852	3.2023	3.40044	5.07056	5.19465	2.62205	6.93816	6.59115	5.49422	1.35179	5.25314	5.69479	6.83853	6.13967	5.68761	2.94454	6.06594	6.18367	3.59117	3.03247	2.76211	4.47056	7.23493	high
TCGA-P3-A5Q6	1.31507	1	4.22849	5.02669	5.57345	3.71062	3.92947	6.01679	6.41878	2.83486	6.89563	7.40377	5.56184	1.99582	4.75178	6.26012	7.0741	6.24303	5.60181	2.90534	5.97144	8.28713	4.36777	3.10034	2.8745	4.47045	8.12995	high
TCGA-CN-4730	2.23836	0	5.47539	3.73278	7.26719	3.1648	4.22214	5.65498	5.77359	2.56281	7.3169	7.57511	5.2115	1.9412	5.70957	5.60331	7.09069	6.51562	5.9552	2.74725	6.04225	6.54204	3.88198	3.20175	2.88345	4.51035	8.04528	high
TCGA-HD-7831	0.989041	0	4.6293	3.64057	4.7199	2.93993	4.28566	5.26987	4.16787	2.4617	6.1371	5.69537	4.97666	1.95032	4.82404	4.6412	6.32254	5.25831	4.99082	2.38127	5.6222	5.3924	3.03428	3.06815	2.82726	3.26574	6.40064	low
TCGA-F7-7848	1.54521	0	4.59315	3.65536	6.72577	4.4604	3.29827	5.3305	7.27491	3.34595	6.95388	7.13294	5.65208	1.70419	5.20796	5.31214	6.28301	6.2888	5.70691	2.49665	6.24891	5.34907	4.48928	3.60487	3.60446	3.97096	6.33871	low
TCGA-CV-A6K2	0.868493	1	4.68483	4.47039	6.10787	3.61256	3.90034	5.61775	4.7002	3.04821	6.30062	7.16183	5.32969	1.41099	5.00132	5.09653	6.73341	6.41959	5.70719	2.49731	5.51255	6.04312	3.18433	3.19779	3.1091	4.18925	7.25852	high
TCGA-P3-A6T0	1.58356	0	4.93269	4.21081	7.08882	3.05526	3.88368	7.21313	4.36847	2.53821	6.59416	6.60753	5.52073	1.53594	4.97433	4.52266	6.77161	6.2592	5.36412	2.90765	5.46496	5.06503	3.85308	3.14942	3.33751	3.97565	7.0769	high
TCGA-F7-A61V	1.05205	0	4.37163	4.35116	7.27624	4.10345	3.31963	4.7798	6.01466	2.82324	6.93952	6.5949	5.03361	3.42954	4.86416	5.34909	6.87982	5.60532	6.07261	3.59879	5.69326	6.82951	4.56094	3.53971	3.35719	4.47805	6.47025	low
TCGA-BA-4077	3.10685	1	4.28592	3.64683	5.92059	3.79827	4.14587	6.15447	4.75817	2.28856	7.00466	6.11872	4.293	2.07157	4.4071	5.09991	6.47942	5.30102	5.5388	3.1524	5.46941	6.22497	3.17932	3.57535	2.96701	3.84733	6.64708	low
TCGA-CN-4735	3.42466	0	4.46776	4.25763	5.21356	4.36494	3.99427	5.99726	5.44719	3.04441	6.59579	6.5753	5.03408	4.09555	5.20137	5.46185	6.68592	6.52595	5.90129	3.14053	4.75792	6.27851	4.03472	3.44582	2.59448	4.30417	6.51657	low
TCGA-CV-5443	7.6274	0	4.30692	3.63175	3.24382	4.47243	2.79761	5.57838	4.90178	3.40465	6.2405	6.29577	4.8075	1.44581	5.02499	5.3039	7.04944	6.18844	5.57302	3.41139	5.72477	6.02229	3.90922	4.03264	3.66612	4.27529	5.92854	low
TCGA-CR-7404	4.03288	0	4.48446	3.65196	5.60611	4.65651	3.56341	5.91856	5.0646	3.09875	6.67964	6.21975	4.75828	1.74893	5.11518	4.8795	6.8007	5.6472	5.75824	3.48034	5.74594	6.37803	3.01336	3.71113	4.1304	4.34536	6.00298	low
TCGA-CN-5355	2.7589	0	5.31801	3.75852	5.8518	3.36652	4.0783	5.13523	5.17307	2.61556	7.25944	6.41744	4.89801	1.50259	5.25953	5.32661	6.40991	6.57841	5.73469	2.85033	5.8623	5.47367	4.24003	3.16422	3.75188	4.35195	6.76551	high
TCGA-CN-6013	1.72055	0	3.7612	3.33256	4.86865	4.07203	2.78758	6.27754	3.87928	3.5417	6.20471	6.5451	4.16758	2.08888	4.46054	4.1432	6.26729	5.41182	4.96804	3.14157	5.37758	5.94942	2.98723	3.23675	3.30148	3.46382	5.56971	low
TCGA-HD-7832	0.958904	0	5.24147	3.69688	6.83768	3.74689	5.04408	6.76677	5.03682	2.8001	7.80228	6.69983	5.45073	1.25984	4.54784	5.13009	6.76234	6.70127	6.0579	2.86174	5.42458	6.16282	3.92341	3.1919	3.90828	4.39859	7.17513	high
TCGA-DQ-5630	2.82192	0	4.7868	4.51208	6.00031	3.41719	3.67373	5.02174	4.5358	2.91322	7.48933	7.0722	5.03432	1.56584	4.62143	5.00824	6.94851	5.52284	5.34645	2.60377	5.42653	6.22335	2.67368	3.24552	2.54754	3.73588	7.08337	high
TCGA-CV-7423	8.38082	1	4.08672	3.35168	6.80434	3.95437	3.32403	5.18702	5.44456	2.38093	6.84962	6.8606	4.70572	1.59821	4.81262	4.38465	6.6723	6.33525	5.56631	2.39997	5.2562	5.36882	3.62883	3.1863	3.52345	3.86493	6.62178	low
TCGA-CR-5249	3.15616	0	3.99522	3.46275	6.54678	3.19452	4.05651	5.70765	3.82885	2.71376	5.50832	5.6203	4.57435	1.67392	4.72773	4.54445	6.47864	5.428	4.9613	3.00826	5.54085	6.95814	2.42297	3.46183	3.90997	3.73513	5.9099	low
TCGA-BA-A6DA	0.961644	0	2.72732	3.03841	5.92882	3.95145	2.83121	5.97015	8.56608	3.33745	6.0711	6.94749	3.62924	2.01041	3.30624	5.78336	6.17985	5.33423	5.15111	2.71045	5.14866	5.86908	4.55671	2.90624	2.55149	4.43184	6.6156	low
TCGA-UF-A71A	0.235616	1	4.7152	4.41766	4.54946	3.78769	3.55052	5.6018	5.34803	3.14288	6.74201	6.98705	5.55386	3.38076	5.15178	5.60787	7.01498	5.83633	5.84251	3.27402	5.89661	6.65958	4.4928	3.47636	2.60656	4.44575	7.01748	high
TCGA-QK-A6IH	1.39178	0	3.40313	3.68844	6.85241	3.91879	2.86149	4.48638	7.38548	2.61533	7.70052	7.7663	5.12124	1.61611	4.38732	5.43318	6.87585	6.4713	6.00991	2.83301	5.08462	5.97695	4.43738	3.34386	3.08662	4.52223	6.9849	high
TCGA-BA-5557	0.663014	0	4.118	3.69202	5.61731	2.48582	3.84479	6.18106	4.23458	2.43987	6.1955	6.32244	4.35458	1.93511	4.26239	4.24513	6.29668	4.9083	4.84941	2.02243	5.38616	5.45133	3.02451	2.81488	3.31418	3.47417	6.57792	low
TCGA-CN-A642	0.224658	1	4.94124	5.01877	6.48114	4.16371	4.25241	6.01785	5.44079	4.03072	8.71282	7.16303	5.64752	1.33397	4.98408	5.84748	7.30518	7.05851	6.61358	3.15973	5.76163	5.7991	4.76392	3.31577	3.30307	4.93389	7.647	high
TCGA-UF-A7JD	2.0137	0	3.88494	3.93737	5.41454	3.86783	4.06322	5.69476	5.19807	3.15617	6.92493	6.6264	4.7462	1.94562	5.13582	5.5873	6.246	6.59673	5.76995	3.00277	6.02892	5.63755	4.50093	3.60212	3.15614	4.80111	6.93013	high
TCGA-T2-A6X2	2.70411	0	4.50549	3.92825	6.22473	4.072	2.6712	4.73562	4.75873	3.22144	7.94658	6.98422	4.82803	1.34111	4.53643	4.90099	6.84416	6.3465	5.70002	3.07185	5.50078	5.08412	4.14875	3.18556	3.2772	3.90865	6.25438	low
TCGA-CN-6998	0.126027	0	4.43148	3.68305	6.50775	2.60072	3.38748	6.34852	4.20636	2.19568	7.25089	6.85842	4.83511	1.36397	4.55022	4.88553	6.37508	5.75765	5.35487	2.06887	5.48738	5.74334	3.74972	3.00447	3.40952	4.09161	6.99544	high
TCGA-CN-A641	1.00548	0	4.52457	3.97133	6.19342	4.10947	2.84718	5.12195	4.94796	3.1537	6.88226	7.01341	4.79985	2.79862	4.89258	5.65167	6.47403	5.98372	5.78097	2.90529	5.95958	6.26534	3.94338	3.3683	3.30332	4.51077	6.21831	low
TCGA-MT-A7BN	1.28493	0	4.11749	4.31068	3.37594	3.76937	2.58927	5.57195	6.65978	2.75541	6.46201	7.3771	4.40995	2.6735	4.19517	5.56358	7.42492	5.90879	5.82153	3.17343	4.95023	5.85702	4.5372	3.54311	3.19995	4.50937	6.81766	high
TCGA-CV-7089	5.40274	1	4.81255	4.26884	6.3104	3.4586	4.53186	5.88619	4.60643	2.65574	6.88518	6.77019	5.18079	1.62806	4.30817	4.9622	6.61809	5.86257	5.39728	2.74563	5.50084	5.47579	3.81725	3.23604	3.26219	4.01695	6.97371	high
TCGA-CX-7219	2.86301	0	4.98057	4.01811	6.26605	3.5838	4.10765	4.7825	4.49608	2.83474	6.93806	6.50871	5.30962	1.43361	5.12985	5.42109	5.92408	6.45578	5.86662	2.80865	5.82034	5.75775	4.39676	3.2475	3.94766	4.21655	6.32053	low
TCGA-D6-A6EP	1.16164	0	3.36117	4.58388	3.74812	5.46269	3.26222	4.49268	7.01512	3.93719	6.45716	7.01477	4.34746	5.59153	4.56204	6.42288	7.07734	6.06821	6.395	4.54174	4.78958	5.93515	4.365	3.80824	3.01253	5.24592	5.31199	low
TCGA-CV-7097	1.05479	1	4.8024	3.66925	6.97221	3.48049	3.34416	6.03077	7.06346	2.5825	6.8654	6.9342	5.78102	1.45964	5.24018	5.21244	6.53913	5.71626	6.23637	2.47507	5.64282	5.81724	3.58271	3.38194	3.32042	4.35795	7.07669	high
TCGA-CV-7433	1.64658	1	4.29163	3.72109	5.39647	3.27462	3.71847	6.29235	7.18345	2.5871	6.1558	6.72592	4.79023	1.74526	5.07078	4.85675	6.58842	5.44998	5.612	2.8438	5.29298	6.08072	3.50358	2.92819	2.8488	3.79293	7.4004	high
TCGA-QK-A6VC	1.03562	0	4.65796	4.79718	5.20544	4.77118	2.87546	6.06894	5.33552	3.59289	6.27131	6.6475	4.65654	1.70032	4.77685	5.27584	6.68544	6.05832	5.86143	3.25325	5.2051	5.89758	4.37724	3.39183	3.26918	4.40235	6.64968	low
TCGA-CV-5444	6.67671	0	4.6829	3.7886	6.70393	3.53985	4.55354	4.28747	4.99394	2.58969	6.70752	6.26076	4.60917	2.13092	4.58155	5.20381	6.67386	5.43772	5.41158	2.95449	5.85482	5.83147	3.67848	3.13707	3.17458	3.75023	6.61859	low
TCGA-CV-A6JM	0.531507	1	3.64983	4.16599	5.16431	4.17469	2.04717	5.72591	7.91595	2.98012	7.7068	8.03323	4.44326	1.71572	3.70882	7.33382	6.66166	7.45947	6.28023	3.10638	4.8584	6.40122	5.19799	3.29972	3.15402	4.89736	6.78743	high
TCGA-CQ-6223	3.91233	0	4.75638	4.15128	5.4378	3.41912	3.03331	4.92868	4.69648	2.57171	6.50479	6.68163	4.59774	1.6421	4.34876	4.77153	6.47751	5.75506	5.16768	2.72878	5.76553	5.8991	2.79129	3.07278	3.38793	3.85709	6.3824	low
TCGA-CX-7085	0.879452	0	4.58689	3.94695	5.49615	2.94034	3.46706	5.80354	3.9447	2.73642	5.97051	5.76988	4.37136	1.67818	4.51786	4.2045	5.88029	4.99752	5.00877	2.48371	5.41511	4.63655	2.69189	3.04189	3.51199	3.31942	5.73477	low
TCGA-CV-5430	11.6192	0	4.64864	4.16033	4.09147	4.4246	3.55679	5.30011	5.10013	2.87314	6.8817	7.18994	5.23015	2.98169	5.31805	4.94969	5.81019	5.74458	5.32158	3.0145	6.13092	5.4417	4.70014	3.62944	3.92868	4.19435	5.85063	low
TCGA-CR-6467	4.86849	0	4.94182	3.68894	4.25264	4.27683	4.71517	5.54938	5.29067	3.57399	7.76172	6.42039	5.78113	1.66987	5.25848	5.26251	7.06203	6.09511	5.62258	3.77435	5.59293	6.43813	3.59119	3.95763	4.36482	4.44833	5.82157	low
TCGA-CR-7392	3.90411	0	4.90162	4.11852	5.95612	3.69606	4.09304	5.18865	4.73013	2.61518	6.45445	6.44594	5.13654	1.77308	5.15355	4.37111	6.72588	5.5405	5.47408	2.95905	5.61341	5.22259	3.23022	3.20532	3.20544	3.87175	6.79798	high
TCGA-UF-A7JS	1.86301	1	3.23411	3.30443	4.83544	4.66788	2.27752	4.71527	6.74805	2.91102	6.79385	7.53696	4.20445	1.41311	3.23019	6.00913	7.08467	6.74313	5.90864	2.72281	3.75598	5.27786	5.75585	3.32824	3.1786	5.19721	6.38681	low
TCGA-CV-7183	10.9068	0	4.61738	3.52594	6.24666	2.62494	2.97873	5.91093	4.29792	2.30348	5.97213	6.83166	4.37101	1.56628	4.08713	4.32224	6.39032	5.64371	5.07133	2.22786	5.2245	4.83264	3.39214	2.5348	3.23895	3.59051	6.59114	low
TCGA-UF-A7J9	3.72055	0	4.27003	3.94851	5.01613	3.44683	4.6881	5.39116	4.56079	3.17171	6.20057	5.9624	5.38058	2.89741	4.91951	4.64264	6.76858	6.0496	5.28283	2.96195	5.86433	6.14929	3.45305	3.63925	3.43893	3.75272	6.18778	low
TCGA-F7-A624	1.03562	0	5.13777	4.77548	5.54858	3.49499	3.82353	6.24577	6.26877	3.3913	8.54606	7.11503	6.34551	1.4236	4.73173	6.02028	7.58207	7.05601	6.51266	2.91691	6.30179	5.83815	4.77149	3.35976	2.75148	4.9848	8.11082	high
TCGA-DQ-5631	1.50137	1	6.0198	4.33771	6.55552	3.8772	3.88633	5.52761	5.60404	2.28078	7.01851	6.90516	4.75323	1.6048	4.82799	4.46927	6.86655	6.07854	4.67607	3.039	5.76926	5.54928	4.07952	3.24229	2.91914	3.89811	7.41255	high
TCGA-UF-A7JT	2.72055	1	4.55385	4.47694	6.31765	4.04459	4.0793	5.91867	5.52262	3.65174	7.4064	6.76732	5.75846	1.44292	4.24409	5.63589	6.84195	6.56729	6.01713	3.29358	5.56257	6.22261	3.88397	3.3944	3.36573	4.61877	6.73735	high
TCGA-CR-6471	3.29315	1	4.83105	3.89575	5.57719	3.41653	3.12024	5.00647	4.26313	2.48771	6.20618	6.20427	4.51015	2.48545	4.46544	3.96044	6.30664	4.98667	4.52889	2.80603	5.61664	5.24316	2.44608	3.30553	3.54236	3.48568	5.48308	low
TCGA-HD-A6I0	0.575342	0	3.63591	4.14391	5.64701	3.85332	3.21318	4.92942	5.92685	3.25587	6.36592	7.8809	4.51235	1.3987	3.47358	5.39361	6.83105	6.98431	5.56518	2.53225	4.38697	5.6364	3.81403	3.16236	2.85231	5.15745	7.05249	high
TCGA-CV-6942	11.7315	0	4.00024	3.86065	6.27111	4.51206	3.67005	5.26135	4.67221	3.19934	7.45778	6.86821	4.93804	1.52352	4.60655	5.89411	6.33659	5.65857	5.93724	2.88034	5.9897	5.36633	4.03511	3.37356	2.86871	5.07629	6.75022	high
TCGA-CR-6487	0.641096	0	4.69015	3.73234	5.47581	3.59774	3.77437	5.5057	4.32406	3.34479	6.61691	6.34616	5.16256	1.43478	4.963	5.16569	6.4028	6.70016	5.74625	3.66779	5.76277	7.61249	3.6425	3.6152	3.97379	4.46255	6.24057	low
TCGA-CV-7245	2.18356	0	5.54944	3.61161	6.46589	3.07352	3.80756	5.59403	4.7402	2.57916	6.62308	6.47833	5.08812	1.91726	4.66348	5.36147	6.50468	5.56437	5.47008	2.71469	5.87614	6.01506	3.73678	3.28502	3.43271	3.85661	6.43843	low
TCGA-MT-A51X	0.663014	0	4.41936	3.83737	6.4927	3.84189	3.32412	4.86527	5.5842	2.57092	7.91919	6.39145	5.29276	2.46679	4.69524	5.13794	6.38528	5.97205	5.83017	3.51938	6.0891	5.90533	4.22678	3.15499	3.00602	4.42367	6.49346	low
TCGA-CR-5247	0.980822	0	4.00751	3.76489	7.02952	3.05678	3.38617	6.17819	5.78021	2.57946	5.80004	7.30037	4.90819	1.89659	4.65101	4.95744	6.9893	6.00944	5.20034	2.38905	5.38996	6.32364	4.31958	2.91557	2.97837	4.34758	7.60117	high
TCGA-DQ-5625	3.10411	1	4.85545	4.11081	7.03976	3.63006	3.86902	4.65709	5.14441	2.36868	7.853	5.81511	4.55279	1.47935	4.63515	5.03291	6.45719	5.29225	5.86175	2.95652	5.56335	5.48292	3.13089	3.2075	3.01288	3.31662	6.51041	low
TCGA-CR-5248	4.55616	0	4.70933	4.04732	5.21056	4.32047	3.22327	4.1574	5.25075	3.31139	6.48728	6.47819	4.85033	1.57493	5.18047	5.20634	6.72263	6.16834	5.6891	3.57477	5.88772	6.16888	3.13345	4.03106	4.03488	4.67781	5.79599	low
TCGA-CV-A460	5.03562	1	4.43654	3.96794	4.31924	4.15406	2.99722	5.84693	6.11872	3.51232	6.85126	6.69227	4.28717	1.55157	5.14949	4.74466	6.93985	5.72621	5.61237	3.2225	5.06635	6.16816	3.56176	3.68636	3.47535	4.42497	6.57035	low
TCGA-CR-7393	2.72055	0	4.95463	4.27515	5.19902	2.87549	3.71843	5.01355	4.23961	2.21598	5.54706	5.89281	4.60532	2.09274	4.71533	4.44563	6.02591	5.52268	5.21279	2.51629	5.37732	5.11627	2.89596	3.22293	3.20838	3.46558	6.22936	low
TCGA-BB-A6UM	1.07671	0	3.7755	3.64737	3.73318	4.55803	3.72352	5.65629	5.35572	3.09725	5.91064	6.49077	4.96245	1.36558	4.62899	4.39666	7.1504	6.10528	5.12558	3.73274	5.27703	6.92085	2.96784	3.48654	3.79393	4.54128	6.42639	low
TCGA-QK-A64Z	1.75616	1	4.91664	4.34573	5.94045	3.9307	3.85689	4.34913	4.94437	3.25359	7.31693	6.89531	5.42644	1.53278	5.12736	4.98051	6.78674	6.11329	5.62014	2.93449	6.09542	7.00111	4.40385	3.28824	3.30145	4.28895	7.166	high
TCGA-DQ-7588	1.16986	1	4.21902	3.58453	7.32093	3.57376	3.74763	6.71204	6.26084	2.64539	7.46853	7.58657	5.55494	1.3641	5.01265	5.7942	6.82746	7.14246	6.33537	2.58844	5.79457	5.39184	4.91562	3.17091	3.08061	4.96531	7.89611	high
TCGA-CR-7371	0.257534	1	5.05109	4.15154	5.74566	3.22783	4.23023	5.60883	4.96413	2.76833	6.65954	6.8123	4.87705	2.08086	5.42289	5.04877	6.49398	5.71813	5.63368	2.93579	5.83808	6.38376	3.66367	3.50144	3.09643	3.81446	7.1295	high
TCGA-F7-A620	1.48767	0	4.89945	4.76924	5.33549	4.62568	4.03816	4.83337	5.67537	3.5562	8.01531	6.33686	5.13554	1.70535	5.09671	5.59799	6.70399	5.51522	6.23865	3.04054	5.71439	6.25864	3.5167	3.22564	2.95951	4.59892	7.01625	high
TCGA-CN-4738	1.19452	1	5.00221	3.86632	5.55559	3.94211	4.2218	6.52271	4.80429	3.20616	6.75771	6.62376	5.51434	1.64135	4.7789	4.75507	6.27139	5.94225	5.48229	2.69837	5.62027	5.18183	3.163	3.23128	3.7258	4.2846	6.2842	low
TCGA-HD-7754	2.14521	0	5.3177	4.63845	3.37438	3.75273	3.55546	5.08425	4.35353	3.0807	6.17358	5.74554	5.32444	1.41151	4.91277	4.43916	6.45667	5.78516	4.7962	3.15076	5.88623	6.01917	2.31106	3.60026	4.13836	3.73752	5.56199	low
TCGA-CV-6962	0.345205	1	5.07459	4.60541	5.79044	3.10568	3.62344	6.27713	5.41387	2.94018	7.53028	7.27546	6.07905	1.64218	5.05384	5.22991	6.69345	6.1544	6.02137	3.22963	6.09499	6.35127	4.68418	3.34578	3.73041	4.73155	7.28086	high
TCGA-CQ-5323	4.01644	0	4.29549	3.52596	6.3235	3.98947	3.86048	5.47732	6.91083	2.80656	6.64009	6.14707	4.81084	1.71779	4.84414	4.85815	6.20844	5.22632	5.51071	3.42995	5.71349	6.37416	2.84906	3.73775	3.12561	3.96117	6.35238	low
TCGA-CV-6938	0.394521	1	4.98698	4.45292	7.44061	3.12115	4.074	5.69736	5.14714	2.91042	7.3719	6.95327	5.38318	1.26993	5.20621	5.36634	6.85927	6.73301	6.13085	2.48231	5.56537	5.80857	4.17166	3.06613	3.0789	4.37284	7.75565	high
TCGA-CV-5440	8.9589	0	4.20626	3.51911	6.33217	4.77133	3.78776	5.46222	6.36555	2.9164	6.70267	6.41522	5.56717	1.45045	4.88367	5.75583	6.51692	5.67679	5.78615	2.90093	5.59426	5.74634	4.75649	3.38699	3.03917	4.16783	6.59157	low
TCGA-UF-A718	3.63288	0	5.45875	4.42031	5.65029	4.00414	3.72936	5.94343	5.5473	2.62004	6.80151	6.0923	4.92924	2.5233	5.0161	4.99936	6.52063	5.36585	5.3286	3.29192	6.00676	6.00363	4.60438	3.12797	2.84725	3.89828	7.00953	high
TCGA-KU-A66T	1.51233	0	4.54832	4.10721	6.54837	5.32242	3.09606	5.95719	6.1649	2.95949	5.87274	6.99572	5.61295	1.33334	4.84832	5.9197	6.90986	5.66961	5.796	2.31268	6.51157	5.90461	4.14148	3.47569	3.05214	4.39102	7.18295	high
TCGA-BB-A5HU	2.14247	0	4.12357	3.75318	7.01637	3.49204	2.91512	6.1216	4.99428	3.4246	7.22956	6.41584	4.72687	1.57728	5.02367	5.42957	5.83345	6.34726	5.50227	2.94458	6.32355	5.2064	4.55989	3.10733	3.2987	4.60701	6.38463	low
TCGA-HD-7753	1.0137	0	4.30318	3.79585	6.94059	2.95751	3.47884	6.17631	6.08766	2.53495	6.43391	7.11587	5.53295	1.4141	4.27636	5.92077	6.86989	5.25144	4.92586	2.80911	5.90404	5.22509	3.85152	3.3135	3.11287	3.84212	6.5854	low
TCGA-CV-7177	1.81644	1	4.35759	3.72226	5.79823	2.52378	4.41855	6.284	4.37048	2.30316	6.49947	6.64701	5.37191	1.81724	4.9475	4.65965	6.65733	5.99154	5.07686	2.78993	5.60718	5.9966	3.42019	3.11319	2.77421	3.53434	7.22533	high
TCGA-CV-7263	1.53425	1	5.39915	4.31022	6.85906	3.407	4.13333	5.85496	5.34877	2.42596	7.67155	6.16425	4.81358	4.10494	5.18842	5.32029	6.50921	5.70693	5.95463	3.1168	5.51699	6.73988	4.5049	3.57658	3.79738	4.37892	6.3638	low
TCGA-CV-6955	0.915068	1	4.85078	4.29932	4.66702	2.94675	2.46657	5.31715	3.93708	2.43241	6.03104	6.20571	3.95462	1.65946	4.04156	4.31504	6.43147	5.24805	4.8407	2.6042	5.26085	5.22066	2.46845	2.79926	3.27429	3.42005	6.05847	low
TCGA-MT-A67F	1.05205	0	4.42575	4.38462	6.69494	3.75682	3.82922	5.32014	4.79605	3.49601	6.78376	6.66475	4.73825	1.37087	4.62319	4.87394	6.26431	5.68319	5.76642	2.08022	5.53933	5.59537	3.1562	3.11277	2.91272	4.29437	7.01284	high
TCGA-D6-A4Z9	1.47671	0	4.51151	3.63458	6.4208	4.13712	3.13579	6.18005	8.69375	3.73397	7.44008	7.16265	5.14719	1.47436	5.0543	5.79737	6.49161	5.6502	5.68754	3.29592	6.33393	5.75492	4.25302	3.34594	3.58627	4.00423	6.47692	low
TCGA-CV-A45X	0.542466	1	4.60357	4.16205	5.21046	4.89467	2.75242	4.65135	6.00937	3.64383	6.62793	7.02416	4.63382	1.30498	5.1636	4.85889	6.43909	5.78406	5.65213	2.78129	5.5301	5.5274	3.98197	3.57316	3.32153	3.8186	6.27999	low
TCGA-CR-6481	0.852055	0	4.61954	4.02383	6.27571	3.01472	3.87245	5.55166	4.16337	2.67466	6.12782	5.9711	4.9133	1.65567	4.75435	4.79229	6.56109	6.32877	5.26178	2.65306	5.62491	6.20177	2.80583	3.4612	3.71819	3.84009	6.30302	low
TCGA-CR-7386	3.91781	0	4.6756	4.18725	5.58238	2.69827	3.39596	4.74701	4.1263	2.29422	6.41242	5.74223	4.32633	1.67629	4.87967	4.59881	6.41297	5.54506	5.02497	2.62716	5.49407	5.71621	3.15556	2.75789	2.25427	3.63141	7.08893	high
TCGA-4P-AA8J	0.279452	0	4.35839	4.27691	4.57275	4.02489	3.1395	5.93866	5.04523	3.01479	7.14614	6.78098	5.01837	2.2775	4.52071	5.21132	6.94051	6.17397	5.21122	3.39952	5.0679	5.74075	4.27996	3.29913	2.5172	4.20046	6.66402	low
TCGA-CN-5364	1.35068	1	4.74688	4.15826	4.87237	4.94123	3.35226	6.04278	7.23744	2.65168	6.57334	6.63363	4.45491	1.79923	4.72191	4.97335	6.68111	6.15961	5.73872	2.80925	5.67	6.08092	4.20278	3.63807	3.32825	4.12991	7.15773	high
TCGA-H7-7774	1.11507	0	4.82295	4.09679	5.45134	3.05847	2.36644	5.58554	4.27692	2.37882	6.01715	6.32887	4.55497	1.37729	3.81423	4.25519	6.84784	5.30584	4.72066	2.3703	5.27846	5.11062	2.36428	2.74425	3.0078	3.57411	6.32464	low
TCGA-QK-A8Z9	0.964384	0	4.10543	3.72374	5.3993	4.34988	4.24191	5.55155	4.93637	3.04302	5.64864	6.33164	5.33176	1.95611	4.88195	5.1396	6.42471	6.233	5.09582	3.06889	5.98443	5.61596	3.56029	3.1877	2.96666	3.577	6.35945	low
TCGA-BB-8601	1.70959	0	5.14829	4.55232	6.15623	3.43211	4.69317	6.05607	5.83387	2.9876	7.90919	7.10857	5.19566	1.75993	4.52318	6.0145	6.81465	6.09539	5.70394	3.57604	5.95147	7.38183	4.27084	3.44099	3.36182	4.44733	7.44222	high
TCGA-CV-6433	1.75616	0	4.46651	4.00656	3.5626	4.33067	3.35483	5.27489	4.67504	3.00567	7.1426	6.01259	4.71436	1.32437	5.18227	5.70916	6.77241	5.51223	5.49398	3.65097	5.51296	6.70475	3.64339	3.76622	3.4946	4.43612	6.16226	low
TCGA-CN-A6V3	0.816438	0	5.2638	4.06748	5.40067	3.55938	4.13391	6.23224	4.94461	3.12949	6.83012	6.61805	5.02886	1.81522	4.92865	5.18156	6.44002	6.11835	5.81579	3.11595	5.72843	6.19589	4.78585	3.36087	3.01329	4.66864	7.33863	high
TCGA-CN-4739	3.64384	0	5.20068	4.19108	4.44623	4.24756	2.78607	5.34716	6.45757	3.32724	7.16609	6.5405	4.57031	2.15594	5.2406	4.87863	6.50558	5.5161	5.80518	2.98717	5.85159	5.85269	3.36113	3.90737	4.32939	3.65044	5.61383	low
TCGA-CN-6024	0.613699	0	4.0765	3.77363	6.7857	3.53643	4.14574	6.31915	5.10161	2.7488	7.53923	6.4834	6.77202	1.8698	4.94974	5.07484	6.41643	4.71545	5.92699	3.12704	5.32852	5.10178	4.29837	3.8184	3.96342	3.4803	5.51843	low
TCGA-CV-6940	2.20274	1	4.34396	3.67836	6.2316	3.81084	3.99799	5.82803	5.39478	2.69801	7.29136	6.23722	4.82549	1.62112	4.99219	5.36745	6.76495	6.17335	5.43338	2.62282	6.04186	5.8637	4.7224	3.63907	3.38543	4.08907	6.93996	high
TCGA-UF-A7JF	4.10137	0	4.11827	4.87436	4.34422	3.72691	2.87708	5.15449	5.73001	3.05461	7.34448	6.91494	4.93491	3.23362	4.41154	4.9993	7.08738	6.50361	5.40485	3.0226	5.49803	6.40619	5.0201	3.24351	2.89641	4.51835	6.9965	high
TCGA-CN-4723	4.65479	0	5.39982	4.16183	5.53666	4.01956	4.03421	5.81455	5.11838	4.05171	7.03335	6.93116	5.19524	2.02834	5.15889	5.1692	6.60049	6.09269	5.60512	3.14501	5.8865	6.00096	4.44918	3.45592	3.55047	4.27683	6.49876	low
TCGA-HD-8314	1.83562	0	4.64773	4.24852	3.69849	4.15425	4.04942	5.62339	4.78781	3.31986	6.37091	6.16237	4.69573	1.95125	4.78322	4.71233	6.28654	4.93969	4.83072	3.42115	5.68822	6.44973	2.57905	3.52049	3.86901	4.27735	5.80641	low
TCGA-D6-A6EK	1.32329	0	3.66431	3.84182	5.53534	3.60436	1.98448	5.30798	5.39466	2.92419	7.28614	7.37603	4.08882	1.68214	3.50737	4.90381	6.47739	5.46638	5.22529	2.57373	4.53576	5.64152	3.61776	3.0176	2.84321	4.15591	6.20809	low
TCGA-CV-6952	0.506849	1	4.60016	3.95923	6.51774	3.02534	4.20642	5.3513	4.60271	2.62535	7.15718	6.77768	4.96434	1.2923	4.65347	4.89922	6.46898	6.15527	5.5904	2.53559	5.65624	5.72571	3.30295	2.89593	2.60035	3.80148	7.42356	high
TCGA-BA-6871	0.172603	0	4.44702	3.98327	5.92493	4.30861	3.41862	5.43052	6.63898	3.56941	6.72426	6.78392	5.68421	1.80996	4.69465	5.47539	7.35222	6.02137	5.83414	3.74113	5.33776	7.08287	4.41111	3.84399	3.82943	4.33136	6.23875	low
TCGA-CR-7390	4.13151	0	5.04621	3.76775	6.34167	3.48687	3.38246	6.14422	5.12004	3.09666	6.63711	6.67408	5.80189	1.50464	4.57555	5.06898	5.88367	6.32872	5.85504	2.8962	5.5875	5.98848	4.43833	3.40593	3.90457	5.34779	6.33824	low
TCGA-CX-7086	1.56986	0	4.69225	3.59405	6.7185	3.55414	3.7551	4.98706	5.47154	3.02054	7.61721	6.71077	5.31917	1.38239	5.46018	5.39461	6.22021	6.74871	6.0404	3.14793	5.68425	5.5669	3.96895	3.64891	4.07466	4.04309	5.97915	low
TCGA-CR-7388	2.25479	1	4.50132	3.90897	5.30514	3.58358	4.01932	6.01255	4.72271	3.24405	6.56128	6.27317	4.79411	2.30655	4.76464	4.87806	6.46869	5.71359	5.32259	3.24929	5.52734	6.63364	4.027	3.63367	3.45194	3.83579	6.25967	low
TCGA-CV-A6JU	0.30137	0	4.86953	5.14047	5.41169	4.78083	2.74137	5.62092	6.13957	4.05888	7.18564	7.79746	4.89699	2.47368	4.48027	6.08352	6.93256	6.26728	6.21471	3.60049	5.38911	6.32968	4.10058	3.54669	3.55484	4.70735	6.35064	low
TCGA-D6-A6EM	0.635616	0	4.47907	4.5837	5.28345	4.16603	3.79154	6.19929	6.29005	3.31993	7.52974	8.12918	5.02163	1.54728	3.55195	5.61344	7.11344	6.37128	5.43209	3.56844	4.96643	6.89638	3.72423	3.50619	3.0416	4.65082	7.19237	high
TCGA-CQ-A4CG	1.17808	1	5.76898	4.76468	6.81283	3.65208	4.70501	6.24457	4.91442	3.05577	7.59516	6.21074	5.09178	1.31845	4.9867	5.3707	6.55732	6.65582	5.72489	3.04355	6.33122	5.97025	4.50625	3.09095	3.2725	4.04302	7.60605	high
TCGA-P3-A6T7	1.33425	1	3.87527	3.41551	5.71517	4.4898	3.32765	6.0634	5.67775	3.4681	7.59131	7.93751	4.92476	1.32383	4.47032	5.7523	6.23414	5.91662	6.03918	3.22431	5.66822	5.97982	3.56169	3.16983	2.97495	4.63721	6.72108	high
TCGA-CV-A6JY	1.76986	0	5.51608	4.03134	5.19962	3.44814	2.49939	5.88385	4.84235	2.95927	6.9127	6.43255	4.54778	2.35456	4.358	4.71931	6.33393	5.49876	5.57091	3.00597	5.3348	5.55877	3.84227	3.0952	3.77876	4.07453	5.79262	low
TCGA-CV-7415	1.90411	1	3.90434	3.94385	5.93976	3.32507	3.43827	6.08873	8.47024	2.57683	6.89994	6.48857	4.9381	1.69479	4.75918	5.01427	6.73968	5.76324	5.47314	3.21051	5.71266	6.15152	4.69312	2.8503	2.95062	3.92062	7.5509	high
TCGA-CN-6018	1.58904	1	5.65351	4.41494	6.39697	3.15623	4.28149	5.64296	5.14574	2.47909	6.7891	6.36489	5.95404	1.53572	4.96837	5.17729	6.56998	6.14955	5.70113	2.6297	5.69191	5.67128	3.42391	3.15949	2.94718	4.23765	7.22621	high
TCGA-CV-5971	1.92055	0	4.91057	3.97935	5.01334	2.91935	3.82844	4.67202	4.47559	2.58519	6.95395	5.61805	4.4892	1.90005	4.78059	4.87456	6.25473	5.7354	5.65293	2.80507	5.37038	5.77471	2.84281	3.15608	2.93847	3.83782	6.41365	low
TCGA-CN-6010	1.72603	0	5.27022	4.26123	5.09274	3.73133	3.62778	6.35808	5.34746	2.85595	6.48867	6.43901	4.9434	1.82156	5.17324	5.08392	6.8296	6.2984	5.67203	3.09117	5.79059	6.18203	3.90821	3.43483	3.8158	4.14764	6.82983	high
TCGA-CR-6478	0.50137	1	4.95595	3.79628	6.34874	4.33127	3.5284	6.60417	7.00828	2.68666	6.91758	7.14409	4.88536	1.44309	5.09407	5.03932	6.65214	6.22872	5.95886	2.77186	5.72115	5.51126	3.40069	3.32601	3.46354	4.18854	7.19981	high
TCGA-CQ-7071	2.40274	0	4.93985	4.20791	6.89887	2.76683	3.19311	5.97281	4.85714	2.56657	6.42612	6.16241	4.85511	1.47918	4.73876	5.05493	6.42242	5.85026	5.62536	2.3058	5.77072	5.16868	3.11873	2.87272	2.77386	4.10231	7.1038	high
TCGA-H7-8501	1.26301	0	5.17643	4.9046	6.64638	3.60908	4.10531	5.96787	5.28159	3.16185	8.5386	7.60096	5.44877	1.30177	4.75568	5.74313	6.86866	6.34214	6.61251	2.71339	5.67734	6.04104	3.35737	3.1431	2.60983	4.16258	7.92608	high
TCGA-CR-6473	3.08219	0	4.56267	3.50889	5.03509	3.94003	3.5969	6.52091	5.57911	2.92876	6.84268	6.51427	4.80922	1.40449	4.25249	5.36341	6.48265	6.38729	5.06443	3.20712	5.74133	6.46673	4.39289	3.80866	3.78886	4.66674	6.37223	low
TCGA-QK-A6VB	1.23288	0	4.58473	4.53761	5.74571	3.6892	3.58049	6.76099	5.01981	3.34314	7.52825	7.14463	5.52745	1.39335	5.28621	5.33021	6.9433	6.54331	5.95449	3.49226	6.68276	5.48604	4.69422	3.77384	3.72701	4.9506	7.28175	high
TCGA-CQ-A4C7	0.967123	1	4.35552	3.82801	6.11933	4.28656	4.99572	5.64369	5.41758	3.30075	7.36789	6.58573	5.5706	1.42113	4.89652	5.27699	6.68817	6.41657	5.69546	3.53701	5.72256	5.93986	3.8589	2.97159	3.37928	4.51647	6.92275	high
TCGA-CV-A6JZ	1.95616	0	5.07478	4.41429	5.35716	4.43663	4.04486	6.1163	5.5332	3.47453	7.57249	7.71099	4.97562	1.51418	4.45869	5.37366	6.52561	6.10677	5.7228	3.77057	5.57369	6.51614	4.06817	3.33799	3.65052	4.22948	6.77004	high
TCGA-CV-A6K0	1.66027	0	4.81982	4.27073	5.91811	3.9599	4.17918	5.42445	4.68249	3.24379	7.00265	6.11397	4.78308	2.31171	4.7594	5.20792	6.38868	5.83938	5.47786	3.16176	5.75934	5.48548	3.65869	3.43532	3.35967	3.98963	6.1284	low
TCGA-BB-4223	8.82466	0	4.46726	3.53519	4.56207	4.11498	3.18387	4.71091	5.01341	3.18829	6.87512	5.69127	5.17422	1.47822	5.05263	5.18617	6.91486	6.10723	5.83429	3.35902	5.55273	6.16852	3.65848	3.89103	4.05896	3.85576	5.44591	low
TCGA-BA-5555	0.509589	0	4.75324	3.76385	6.94801	3.79792	4.17453	5.77506	5.21644	2.4316	7.10913	6.73614	4.91386	1.5416	5.2953	5.46574	6.51879	5.97063	6.15368	3.42778	6.07326	5.96241	4.09407	3.47315	3.4604	4.1783	7.09658	high
TCGA-CV-7104	1.07671	1	4.25737	3.83772	6.88658	3.34797	4.15459	5.98528	4.41416	2.52288	7.47226	6.55111	4.43246	1.44636	4.72473	4.78095	6.2668	6.00412	5.43352	2.98327	5.94306	5.27559	3.99616	3.18868	2.65108	4.00832	7.3488	high
TCGA-CV-7407	2.96164	1	4.01425	4.21244	5.78124	3.2535	3.85106	6.02505	4.57757	2.90196	7.58231	6.37212	4.82724	2.14541	4.09735	4.94681	6.89876	5.42535	5.44262	3.02489	5.71148	7.1923	3.79933	3.29513	2.84076	4.09028	7.1341	high
TCGA-CV-7434	0.59726	1	5.02524	3.87739	7.23709	3.50625	4.28271	5.40275	4.94398	2.59014	7.46359	6.18328	4.99096	1.4771	4.9698	5.6165	6.3823	6.0696	6.03883	2.99586	5.74328	5.86362	4.09517	3.13856	3.55937	3.65249	6.6332	low
TCGA-HD-A634	0.356164	1	5.17493	5.32753	5.6525	4.20392	3.06351	4.4226	6.18654	3.59864	7.69035	7.53029	5.07685	1.37863	5.04	6.6271	7.5092	7.91445	6.48258	3.21754	6.05969	6.6158	3.74375	3.70768	3.50204	5.06757	7.37405	high
TCGA-CV-7252	0.413699	1	4.82932	4.18644	6.73603	3.42081	3.41764	5.90823	5.09207	2.94774	6.66811	7.06601	5.34707	1.53116	5.32458	4.97119	6.54077	5.8822	6.00282	3.1105	5.93511	5.70695	4.00365	3.16799	3.1807	4.29382	7.20055	high
TCGA-CQ-6227	0.353425	1	4.60478	3.72614	7.11099	3.45085	4.218	5.32294	5.58313	2.56095	7.20616	6.6616	4.97425	1.94663	4.79271	5.12514	6.19919	5.99564	5.50962	2.87967	6.07214	5.99619	3.93439	3.01892	2.95942	4.19648	7.11047	high
TCGA-CV-5976	4.04932	0	4.16408	3.64444	5.94916	3.94026	4.43596	6.19933	5.36236	2.98611	7.64719	7.06352	5.12641	1.27492	4.7446	5.1851	6.46905	6.16109	5.3375	3.64267	5.64165	5.64367	4.71324	3.23931	3.51073	4.33293	6.80562	high
TCGA-CN-4740	2.22192	0	5.04605	4.08322	4.50999	2.99687	3.10495	4.87746	4.75249	2.80728	7.07363	5.91749	4.69999	1.76511	4.63987	5.09896	6.45753	5.43338	5.22569	2.81144	5.48245	5.6152	3.78029	3.14233	3.18171	3.71682	6.11557	low
TCGA-CV-A45U	2.95616	1	4.41301	4.35659	5.44759	5.20421	3.60795	5.53119	5.81368	3.40218	6.82708	6.7876	5.3374	3.64012	4.86081	5.44924	6.45993	6.0054	5.15025	3.07689	5.97448	7.4125	4.15269	3.54933	3.54475	4.11537	5.91919	low
TCGA-CV-7435	12.8219	1	4.77907	4.47864	6.40361	2.83397	3.18736	5.71799	5.95516	2.37834	5.75512	5.96819	5.97351	2.00345	5.07571	4.75379	6.12856	6.10309	5.65691	2.62689	5.70209	5.82503	3.44738	3.3509	2.94373	3.82346	6.71244	high
TCGA-H7-8502	1.25479	0	4.23328	3.50591	7.37276	4.41127	4.65153	6.66963	7.35018	2.61601	6.99117	7.36051	4.91044	1.31265	4.9497	5.24903	6.75624	6.20391	5.80494	3.16186	5.58343	6.19497	3.96087	3.09135	3.51686	4.39348	7.66609	high
TCGA-CV-A461	5.65479	1	4.41308	5.14319	4.69552	4.11193	3.73605	5.55302	5.16324	3.28071	7.27386	6.14702	5.18922	2.53304	5.1304	5.60015	6.68237	6.0835	5.92122	3.58275	5.75456	6.27534	3.9221	3.43648	3.21803	4.18757	6.56536	low
TCGA-BB-4217	0.512329	0	4.86053	4.07063	6.05945	3.82199	3.58562	5.76336	8.47214	3.01066	7.1199	7.27916	5.07302	1.96404	5.09865	5.86566	6.83949	6.21639	6.22675	2.75294	6.32922	5.5725	4.30419	3.79633	3.36671	4.17131	7.26381	high
TCGA-CQ-7063	4.79452	0	5.09479	4.01089	6.45891	3.97154	3.99081	5.85666	4.53037	2.88393	7.22369	6.01456	4.89016	1.36171	4.63591	4.46542	6.52248	6.15548	5.43831	2.84997	5.36064	5.0505	3.39113	2.96315	3.39392	3.94009	6.52622	low
TCGA-CV-7427	13.0411	1	4.90826	3.92912	6.67937	3.10666	4.01637	5.98402	4.2266	2.71198	6.87368	6.46677	4.83123	1.28884	4.51932	4.69005	6.44395	6.04867	5.46633	2.53558	5.4829	5.11948	3.04294	3.23718	3.43704	3.72575	6.5709	low
TCGA-BA-5152	2.31781	0	5.00829	5.04472	6.20244	3.40156	3.84155	5.19094	5.46669	2.55572	6.85661	7.27299	5.20359	1.39304	4.82815	5.29745	7.20959	5.72688	5.56535	3.07743	5.66727	6.03131	3.81385	3.08487	3.0384	4.13011	7.71736	high
TCGA-IQ-A6SG	1.5863	0	5.33391	4.63479	6.78145	4.14162	3.39666	6.57634	5.65101	2.80955	7.38197	7.55519	5.65622	1.48811	4.8422	5.57286	6.15259	5.34356	5.63676	3.2456	5.71382	5.83788	3.71663	3.56534	3.68786	5.0083	6.65536	low
TCGA-WA-A7GZ	1.71233	1	4.81388	4.36378	5.20177	5.02522	3.86401	4.70147	4.77948	3.38078	6.87216	6.98647	4.96381	1.55611	5.4402	5.0065	6.10707	6.1426	6.31651	3.35337	5.72724	5.82557	4.41586	3.22931	3.27329	4.39575	6.87592	high
TCGA-CV-6003	4.56164	0	4.19986	3.80898	6.49179	4.25714	4.03214	6.3399	5.91565	2.98774	7.75151	7.87822	5.92373	1.38032	5.0177	5.94748	6.23735	6.69824	6.34573	3.0684	6.0076	5.82121	4.02377	3.14705	3.1527	4.03723	7.10021	high
TCGA-CR-7389	1.07397	0	4.73091	4.02031	5.09717	2.884	3.82993	4.9063	4.10487	2.20251	6.30276	5.98478	3.88978	1.88578	4.62739	4.32796	6.32747	5.23309	4.98282	2.63516	5.17513	5.71617	3.84642	3.23085	3.29905	2.95188	6.43267	low
TCGA-DQ-5629	2.57808	1	5.24476	4.1213	6.05958	3.13801	4.27291	6.11109	5.37902	2.84726	6.94002	6.90326	5.79608	1.64563	5.17727	5.73819	6.76692	5.02297	4.78342	2.55364	5.2622	6.62099	4.18829	3.6168	3.37726	4.47564	6.77322	high
TCGA-CR-7374	0.0821918	0	5.74468	4.87347	4.80099	4.18693	3.58178	5.65235	5.42537	2.99917	6.3104	6.98671	5.362	1.83055	4.81551	4.73492	6.63183	6.17309	5.62606	3.6418	6.2513	6.92057	4.23336	3.71016	3.26695	4.45442	7.29927	high
TCGA-CV-5979	3.60274	0	3.85032	3.12808	7.10747	4.34093	4.45829	6.2558	4.37307	2.62111	6.41015	6.93084	5.06539	1.45622	4.59711	5.23486	6.31032	6.15425	5.5814	2.77171	5.57895	5.04817	3.96674	3.26713	3.06085	4.10682	6.7243	high
TCGA-BA-5556	0.490411	0	5.29343	3.93518	6.24578	3.23481	4.27501	6.23901	4.76714	2.54861	7.00739	6.71363	4.89174	1.43134	4.76032	4.63853	6.37226	6.27982	5.55637	2.86597	5.28933	5.17645	2.73595	3.05341	3.56972	3.93349	6.70542	high
TCGA-CN-A63W	0.953425	0	4.90792	4.23841	7.26413	4.25498	3.33386	5.97665	5.23406	3.55632	7.61155	6.55541	5.25436	3.08234	4.8664	5.53661	6.42672	5.35754	6.1408	2.90724	6.21399	6.10869	4.64029	3.25968	3.46434	4.79121	6.37465	low
TCGA-BB-4228	1.52877	0	4.21568	3.26468	4.75795	3.69988	4.06963	4.77909	5.3503	3.22494	7.54841	6.05009	5.40072	1.36965	4.73633	6.02284	6.97576	6.43829	5.99887	3.37743	4.70111	5.71383	4.30846	3.80533	3.40049	4.22049	5.79096	low
TCGA-CQ-6229	3.23014	0	4.16953	3.5321	6.0816	3.40805	3.97144	5.69034	5.11764	2.83009	7.06083	6.50032	4.70069	1.44294	4.38913	5.37208	6.07921	5.83954	5.41247	2.90868	6.04519	5.98941	3.32605	2.95363	2.74203	4.18391	6.89412	high
TCGA-D6-6825	1.34521	0	4.18634	3.4878	6.47612	3.97995	4.01591	5.82601	7.34113	2.9487	6.64091	6.77065	4.66763	1.36454	4.87784	5.18617	6.38178	6.0099	5.37194	2.75484	6.19718	5.56322	2.79972	3.30357	2.90879	3.98208	7.06174	high
TCGA-CV-7250	7.94521	1	4.472	4.81726	6.84906	3.29494	4.1966	6.66847	4.81791	2.91899	6.76694	7.31504	4.97043	1.38328	5.23134	4.91698	6.46875	6.47097	5.65649	2.54781	5.66879	6.22886	3.49519	3.55039	3.83375	4.55792	7.48697	high
TCGA-RS-A6TO	1.06027	1	4.42219	4.25577	5.76874	3.77655	4.03519	5.88615	5.28798	2.89536	7.78625	6.80576	4.97281	1.83999	5.26889	5.58039	6.4793	6.3442	5.94153	2.78529	5.79739	5.64911	4.65277	3.4255	2.88984	3.55296	7.15391	high
TCGA-CR-7380	1.66027	1	4.59352	3.57657	6.86176	3.03492	3.96684	5.31643	5.13473	2.77567	6.89073	6.64729	5.04075	1.53909	5.15728	5.25787	6.39844	5.90569	5.89984	3.08276	6.09764	5.57818	3.56971	3.09704	3.21182	4.27334	6.91258	high
TCGA-CR-6474	1.54521	1	4.3689	3.78887	5.98821	2.71227	3.92211	5.41947	5.66125	2.30153	6.27361	6.3922	4.64917	1.83828	4.72014	4.8036	6.56412	6.12689	5.01557	2.88343	5.64866	5.4982	4.35612	2.9586	2.96486	3.77682	7.13553	high
TCGA-CV-A6JT	2.33425	0	3.27396	3.96536	4.66322	3.61056	3.11289	5.05742	5.12678	3.09574	7.00549	6.71992	4.15038	1.92186	4.03091	4.5712	6.34954	5.52269	4.73186	2.97594	4.60231	5.5994	3.77634	2.98813	2.8763	4.0172	6.13862	low
TCGA-CV-6933	7.50959	1	4.24325	4.35351	5.52868	3.84613	3.84525	5.8683	5.38327	2.75004	6.6699	6.14454	4.96502	1.56343	4.75471	4.67658	6.21404	5.74415	5.47785	3.45223	5.15353	5.95157	4.07835	3.27291	2.96585	4.41777	6.89896	high
TCGA-T2-A6WZ	1.32603	1	3.39206	4.06068	4.42822	4.03676	3.4387	4.9281	6.13182	2.52132	7.43152	6.86741	5.28712	2.66395	4.22893	6.24344	6.85068	6.12079	6.20224	3.6172	5.61844	6.09372	6.07845	3.2331	3.41954	5.21779	6.78834	high
TCGA-IQ-A6SH	1.29041	0	4.69701	4.45107	5.24665	3.79022	3.27297	5.38128	5.44843	2.89032	7.06825	6.61522	5.14711	1.57643	4.61028	5.68017	7.18138	6.07446	6.21129	3.41231	5.9259	6.49416	4.08719	2.93638	2.62432	4.33199	7.56827	high
TCGA-CR-6484	0.969863	0	5.00156	4.18435	4.73229	3.41295	3.62628	4.82981	4.22618	2.79043	7.17083	6.1112	4.41335	1.61777	4.52811	4.88141	6.45368	5.58229	5.57253	2.95246	5.13493	6.04341	3.258	3.29611	3.43219	4.33961	6.35543	low
TCGA-QK-A6IF	1.47123	0	4.16085	3.84453	5.03885	5.00144	3.89102	4.77426	4.91939	4.5424	6.22199	5.93213	5.08526	3.29228	5.26521	5.24393	6.92109	5.92096	6.10397	3.57769	5.68163	5.60136	3.92857	3.98929	3.70925	4.15428	5.10179	low
TCGA-CN-5359	1.03288	1	4.88226	3.62841	5.31449	2.96267	4.1133	5.18697	4.5017	2.7233	6.94323	6.44922	5.34908	1.72985	4.88534	4.89529	6.23502	6.27662	5.41824	3.04969	5.61277	5.75743	3.4438	3.32961	3.2715	4.05485	6.35717	low
TCGA-CN-4741	3.47397	0	3.591	3.41349	4.20111	4.29373	4.31184	4.48923	4.41338	3.40295	6.0063	6.03223	4.40348	2.24615	4.56672	4.68239	6.5242	5.41747	4.71141	3.40233	5.66784	6.65959	2.69316	3.80266	3.06204	3.77796	5.70774	low
TCGA-CN-5358	0.715068	1	4.89956	3.82722	4.54294	3.21265	3.94063	4.749	4.76235	2.69234	6.22503	5.68022	4.38884	1.77739	4.44627	4.50756	6.4504	5.76838	5.39049	2.62567	5.54822	5.51997	2.7577	3.20639	3.51918	3.97468	6.25938	low
TCGA-KU-A66S	1.11233	1	5.14795	4.44223	6.09449	3.76455	4.01063	4.75399	5.9118	3.54296	7.75149	6.77192	5.01255	1.81849	5.68941	6.00065	6.97664	6.75672	6.39605	3.04756	6.27814	6.03719	4.84032	3.57146	3.30558	4.42787	7.31563	high
TCGA-BA-A6DG	0.189041	1	3.96622	3.75043	6.83767	4.03928	4.13626	6.16348	5.18827	2.78907	7.03307	6.87703	5.0438	1.92571	4.59705	5.2436	6.20267	5.32756	5.14997	2.34181	6.06562	5.49933	3.68844	3.15985	3.03976	4.02782	6.76046	high
TCGA-CV-5978	0.589041	1	5.50518	5.4746	4.79117	3.33376	4.36178	5.23285	4.95211	2.55344	6.81607	6.08055	5.01363	1.79736	5.4947	5.30686	6.74377	5.95201	5.74468	3.25297	5.79524	6.34676	4.10025	3.39281	3.00395	3.90874	7.61887	high
TCGA-CN-4737	1.71233	0	4.68332	3.81325	4.74166	3.6568	3.6049	4.32961	4.33315	2.96079	6.88616	6.35479	4.95589	1.7724	5.26502	4.45724	6.46511	5.80107	5.22875	3.1917	5.52956	5.12227	3.9034	3.34201	3.66591	4.18483	5.95908	low
TCGA-CQ-7072	5.34247	0	4.34468	3.71731	5.02503	3.71015	3.67702	4.29646	4.59723	2.92928	6.32517	5.82341	4.68241	2.92181	5.44831	5.15711	6.40009	5.45616	5.7149	2.70747	6.17444	5.63196	4.24476	3.79064	3.16815	4.13134	6.12786	low
TCGA-F7-A50I	0.252055	0	4.03523	4.11819	5.02096	4.05135	3.54449	5.72841	5.71512	3.14063	7.18715	6.64578	4.73458	1.63067	4.87746	5.88804	6.3155	5.18131	5.45148	2.74555	5.98243	5.75563	4.13567	3.49005	3.04588	4.27043	6.65408	low
TCGA-BA-5151	0.520548	0	5.18708	3.97462	7.11114	2.70282	3.61732	5.40579	4.79015	2.8269	6.50413	6.66061	4.84349	1.31686	4.90415	4.82658	6.62021	6.34331	5.55357	2.42431	5.76317	5.76282	3.99982	2.96284	3.126	4.04136	7.31801	high
TCGA-DQ-5624	4.87123	0	4.35035	3.93144	6.65179	2.85306	4.1725	5.44016	4.44344	2.77822	7.222	6.26338	5.35046	1.68817	4.52948	4.7562	6.81401	5.67823	5.08241	2.82357	5.63913	5.60308	4.46666	3.05665	3.21574	4.28226	6.86033	high
TCGA-CQ-6218	3.43288	0	4.8861	3.93932	5.95801	3.0068	3.2737	5.9526	5.03826	2.5288	6.6465	6.35547	4.83232	1.74835	4.88141	4.96917	6.64239	5.14099	5.72468	2.64981	5.57993	5.28104	3.98112	2.92163	3.03974	4.18683	7.03138	high
TCGA-MZ-A5BI	0.594521	1	4.19092	4.42278	5.21148	4.00726	4.07439	5.10996	5.13093	3.77251	7.09086	6.44864	5.23307	2.63917	4.53999	4.91731	6.66291	6.09929	5.52459	3.25488	5.23761	6.60452	3.88987	3.72044	3.9935	4.30678	5.747	low
TCGA-CN-A49B	1.72329	0	4.46246	4.05066	7.30342	4.2468	2.88166	6.35461	7.06888	3.30305	7.29335	6.85246	5.30837	1.47959	4.87274	5.4229	6.99289	5.9414	5.71203	3.1364	5.54451	6.50397	3.27281	3.46545	3.05558	4.36756	6.83725	high
TCGA-CV-7440	1.84932	1	5.90356	4.86744	6.66065	2.98266	3.00364	6.06996	5.12034	2.98942	7.69892	6.72916	5.38358	1.38709	5.56832	6.05988	6.89696	6.1577	7.00153	2.57137	5.65479	5.14405	3.75253	3.63856	3.76675	4.77359	7.00006	high
TCGA-CV-5439	1.49589	1	4.84206	4.16438	6.11177	3.17796	3.659	6.46621	4.57015	2.74295	6.69096	6.4915	4.94885	2.05253	5.23603	5.15761	6.59449	5.89408	6.19911	2.67722	5.58097	6.16616	3.91283	3.09977	2.93014	4.28135	7.42991	high
TCGA-BB-A5HY	0.879452	1	4.93999	4.40167	6.23198	2.96664	3.62091	5.72417	5.32991	2.36639	7.87045	6.32083	4.22502	2.28689	5.47415	5.99097	7.3112	6.15285	6.10514	3.03791	6.0031	6.74642	4.60403	3.44151	3.00501	5.11876	8.01758	high
TCGA-CN-5361	4.60548	0	4.25309	3.68798	4.53909	3.52872	4.13559	5.13605	6.20639	3.04644	5.36374	6.59378	4.88768	2.43351	4.2906	5.09427	6.76655	6.00541	4.49108	2.93736	5.6919	7.24504	2.91928	3.19335	2.87194	3.59788	6.54057	low
TCGA-CV-7432	7.0411	1	4.05132	3.34031	6.6744	3.36605	4.26984	6.89135	5.6088	2.3372	6.83763	7.02188	5.09335	1.34104	4.72592	5.44913	6.86453	6.21973	5.79227	3.00405	4.89204	5.64615	3.9599	3.1515	3.71087	4.7236	7.06933	high
TCGA-CV-7101	0.438356	1	5.04928	4.55014	4.93877	3.10344	4.01193	5.97591	5.04197	2.69912	6.75139	6.20732	4.80417	1.93914	4.86486	5.45698	6.35815	5.94611	5.80499	2.94724	5.63535	6.02392	3.64564	3.64615	3.32394	4.10604	6.79207	high
TCGA-CR-7373	2.43562	0	5.35276	4.20339	7.24095	3.52678	4.58364	6.21163	5.08798	2.62424	7.04235	6.58252	5.39048	1.26998	5.25874	5.50957	6.65004	5.80722	6.17308	2.73767	5.59836	5.1543	3.45614	3.35837	2.93416	4.26714	7.42743	high
TCGA-CV-7099	0.665753	1	5.13257	4.27693	6.17483	3.67969	3.48033	6.02616	4.98673	3.00354	7.04281	6.73909	5.28622	1.29658	4.85493	5.36985	6.64548	6.40677	6.06496	3.10382	5.4298	5.53818	3.78252	3.26838	3.64961	4.25543	6.61543	low
TCGA-CR-7397	2.06575	0	4.59775	3.91906	5.57222	2.80664	4.01523	5.74283	3.80505	2.4036	5.83861	6.19103	4.55282	1.84276	4.48513	4.71687	6.06117	5.70755	5.21058	2.49342	5.13465	5.258	3.61093	3.07507	3.25317	3.60808	6.40708	low
TCGA-P3-A6T6	1.08219	1	4.56344	4.16851	4.34047	5.29658	2.62561	5.39836	5.74259	3.65304	7.01515	7.40201	4.63399	1.50515	4.85098	5.7709	7.21465	5.44295	6.32316	3.50891	5.34428	5.80998	5.17865	3.87158	3.84456	4.8412	6.4038	low
TCGA-UF-A7JC	1.49589	1	3.95232	3.24377	5.71204	4.03781	3.69236	5.57854	4.57275	3.23941	6.85985	7.25424	5.30284	1.40625	5.39851	5.12713	6.23319	5.81401	5.43433	2.92108	5.62921	4.92129	4.16728	3.25535	3.43072	4.04039	6.14727	low
TCGA-CV-7255	0.175342	1	5.18749	3.99582	6.8536	3.45886	4.48254	5.86781	4.85579	2.3538	7.1014	6.34319	4.78084	1.61839	5.64905	5.11315	6.53141	5.94819	5.95006	3.06842	6.00662	5.58784	3.28826	3.05212	3.18181	3.87738	7.35549	high
TCGA-QK-A6IG	0.608219	1	4.37481	4.05676	5.94213	4.77912	4.18473	6.21894	5.52245	3.65871	7.68661	8.03974	5.81753	1.35853	4.3195	6.1488	6.99315	6.68872	5.74308	3.25446	6.05394	5.33382	4.56624	3.62209	3.12887	4.86266	6.99767	high
TCGA-MZ-A7D7	1.49863	0	4.61462	4.5563	7.12193	3.83742	4.05021	5.48294	5.7363	2.77354	8.47936	6.889	5.06436	1.30507	4.35085	6.47452	6.33402	5.47855	5.64979	2.89906	6.00954	7.41232	3.71523	3.05288	1.80717	4.02562	7.82364	high
TCGA-F7-8298	1.34247	0	4.16908	3.91528	6.6391	3.59958	4.23055	6.36457	4.49669	3.388	7.5043	7.54046	4.18395	1.82547	5.30205	5.11069	6.6162	5.73914	5.66328	2.81155	5.68472	5.53048	4.42957	3.69	3.44402	4.07048	7.06536	high
TCGA-CR-7395	2.54795	0	4.92448	4.06429	6.8153	2.99962	3.35638	6.05562	4.71899	2.72417	6.52015	6.57106	4.90048	1.65403	4.7224	4.68857	6.47864	6.19158	5.7069	2.7056	5.37751	5.46715	3.32392	3.14225	3.53726	3.97973	6.59919	low
TCGA-CR-7398	0.427397	0	5.68793	4.76746	5.73345	4.2008	4.51347	4.90937	5.10869	3.46879	6.58736	6.80349	6.81561	1.67843	5.64307	4.24234	6.81033	6.9696	6.74024	3.42875	5.33248	5.0993	3.98823	3.60492	4.31604	4.19817	6.3841	low
TCGA-CV-7261	4.14247	0	5.12997	4.72045	5.87615	3.6582	4.29637	6.01586	4.862	2.47062	6.40327	6.00863	4.94861	1.78766	4.76649	5.25799	6.21453	4.50492	6.10999	3.2252	6.90072	6.06967	3.62324	3.70664	2.81947	3.9769	7.42371	high
TCGA-DQ-7591	1.70411	0	4.36775	3.69492	2.84506	4.38926	4.82584	5.71781	5.26237	3.4466	6.68099	5.90677	4.84976	1.34773	5.36422	5.29513	6.58975	6.4767	6.18	3.3954	5.98649	5.9949	3.93285	3.90799	2.91366	4.28151	7.10427	high
TCGA-P3-A5Q5	2.49315	0	4.76276	4.80243	5.21699	4.68146	2.60411	4.54001	5.31482	3.78281	6.44786	6.89743	4.8407	1.45904	4.66716	5.01804	6.95274	6.04781	5.47905	3.5062	5.62993	6.58548	3.43696	3.65487	3.81423	4.5815	6.11463	low
TCGA-CV-7236	0.394521	1	5.0093	4.08557	5.99146	3.3689	4.89436	5.99349	4.38954	2.42046	7.13204	6.59763	4.96906	1.77721	5.2751	4.72787	6.63344	6.14495	5.55415	2.62262	5.64612	5.72035	3.74825	3.10598	3.32633	3.94636	7.43174	high
TCGA-CQ-5331	3.83288	0	5.02518	3.96357	6.39719	2.98264	3.9516	4.94109	4.63711	2.98876	6.40022	6.32802	5.13054	1.33235	4.91406	4.79961	6.47784	6.50239	5.86875	2.90393	5.67202	5.17122	3.39902	3.16247	3.47455	4.10327	6.6006	low
TCGA-CV-6945	1.00274	1	4.12383	3.76999	5.78992	3.71157	2.74914	6.30031	5.45868	2.72712	7.36677	7.2825	5.38872	1.88864	5.09938	5.50022	6.80627	5.11664	5.63711	3.00456	5.62159	5.62033	4.07915	3.08447	2.96256	3.81048	6.64528	low
TCGA-CV-A6JE	2.94521	0	3.3097	4.10128	5.93897	4.03968	2.87231	4.28141	7.85644	3.33213	7.55782	8.10017	4.67149	2.04536	3.93398	5.92257	6.77271	5.83553	5.94993	3.62549	4.66804	5.70895	4.70201	3.63952	3.1023	4.84357	6.37375	low
TCGA-CN-4742	1.08767	1	5.19149	4.25487	6.62485	3.42113	3.9083	4.74326	5.0702	2.35808	6.35124	6.76806	4.62598	1.65746	4.55088	4.54836	6.51833	5.29102	5.14476	3.02816	5.45891	5.11062	3.30236	3.38625	2.94089	4.02284	6.82704	high
TCGA-CV-6441	0.8	1	5.17369	4.14768	5.89167	3.62802	2.79056	5.67382	5.31509	2.81099	7.08985	7.01015	4.43215	1.79391	4.5254	6.14577	7.39111	6.93951	5.83539	2.94423	5.7346	6.21999	3.93867	3.54937	2.97799	4.40247	7.12405	high
TCGA-HD-8634	1.05479	1	5.05132	3.9458	6.2548	3.64167	3.7479	5.91104	4.50918	3.2921	7.25879	6.69557	5.2659	1.57021	4.70538	4.7489	6.35444	5.51887	5.52949	2.93285	5.52358	5.32839	3.68348	2.89191	3.6336	3.92179	6.21641	low
TCGA-CV-A6JO	0.539726	1	4.64588	4.36209	6.86878	3.56226	4.04414	6.04517	4.90463	3.36759	7.49935	6.79779	5.08871	1.36651	4.79046	5.30447	6.69329	6.32995	5.91998	2.86452	5.55479	5.58265	3.87236	3.12225	3.39826	4.22739	6.97482	high
TCGA-CR-7394	3.68767	0	4.79949	4.09332	6.26087	2.73208	3.72985	5.5615	3.91853	2.51117	5.66348	6.11799	4.33329	1.59865	4.38244	4.32485	6.27389	5.62872	5.23052	2.54225	5.66579	5.06824	2.63243	3.17596	3.23782	3.52368	6.50886	low
TCGA-HD-A633	1.15342	0	4.85261	4.07147	6.13828	3.67787	3.47539	5.65218	5.60041	2.82959	7.14068	7.19735	5.65581	1.39475	4.77838	5.51302	7.01723	5.53993	6.04186	2.76637	5.1494	6.00374	3.94344	3.34723	2.96298	4.77538	7.21201	high
TCGA-CV-5431	1.43014	1	4.23174	4.02719	5.69175	3.89969	3.85035	6.10686	5.21148	2.87148	6.18186	6.29511	5.73934	1.49244	5.72809	5.44419	6.83263	5.58972	6.9138	2.74546	5.44567	5.92269	4.04153	3.73648	4.00388	4.42074	6.77244	high
TCGA-CV-5436	1.6	1	4.68905	3.84421	6.75184	3.25299	4.25956	6.82345	5.27491	2.8566	7.34912	6.54948	4.93276	2.06459	4.12279	5.22072	6.71457	5.71306	5.11605	3.16214	5.59541	6.0088	5.52678	3.46066	3.66829	4.40521	6.76902	high
TCGA-CN-A6V7	0.515068	0	5.20338	3.69893	5.01772	4.42454	3.59653	7.22778	6.46316	3.113	7.84023	6.99087	5.78117	1.93989	5.22899	5.50752	6.76317	6.14756	5.69579	3.68197	5.66826	7.85409	2.92807	3.6627	4.58024	5.26869	6.23722	low
TCGA-CV-7438	0.531507	1	4.92514	4.02871	6.8792	3.33166	3.86162	5.9802	5.12427	2.78927	7.57314	6.65794	4.90836	1.4978	4.23759	5.13791	6.54108	5.95962	5.2848	3.16187	5.53872	5.86793	4.52541	3.26902	3.38994	4.31076	6.77779	high
TCGA-CN-4727	1.23836	0	4.59495	3.58801	7.60867	3.61139	4.60378	6.78503	5.54845	2.91057	6.75648	7.07057	5.71804	1.67684	5.1066	5.14081	7.45414	5.75795	6.01065	2.48695	5.86766	6.27293	3.83324	3.71145	3.66301	4.31944	7.43642	high
TCGA-CQ-5326	0.243836	1	5.1426	4.16685	5.94411	3.57552	4.5399	5.82132	5.22548	2.67939	6.32659	6.45278	4.95149	1.31482	5.21958	5.24805	6.34003	6.07647	6.01299	2.53855	5.64036	4.97545	4.28926	3.20516	2.78184	4.77276	7.76897	high
TCGA-CN-4731	2.72055	0	5.5432	4.39433	5.84276	3.32101	3.07466	5.95077	4.98296	2.74937	6.92729	6.71929	4.64519	2.43158	5.02814	5.20603	6.817	5.65163	5.61813	2.8417	5.97904	5.76658	3.56667	2.9654	2.33417	4.20196	7.43184	high
TCGA-CV-5434	9.07945	1	4.92929	4.13963	5.37869	3.33299	3.94501	6.35222	4.80762	2.92193	6.54224	6.05778	5.10887	2.0077	5.44935	4.83775	6.7235	5.49492	5.8174	3.38581	5.13319	5.77944	4.74498	3.72092	3.44573	4.1778	6.68121	low
TCGA-CN-6989	1.67397	0	4.39168	4.04704	6.005	3.17901	3.85921	5.82916	4.59398	2.8662	6.33886	6.04668	5.1278	2.02273	4.85349	5.02169	6.20356	5.99562	5.5167	3.0485	5.40731	6.50321	4.21884	3.64196	3.9309	4.35172	6.15377	low
TCGA-F7-A622	0.983562	1	4.93074	4.87237	6.10765	4.37569	3.39134	5.08134	6.12448	3.17298	6.97254	6.87527	5.01245	1.60739	4.35709	5.6376	6.97292	6.43304	6.29523	3.22243	5.47949	6.29563	4.37091	2.88523	2.75742	4.85417	7.64305	high
TCGA-CN-6016	1.6274	0	4.12451	4.12834	5.34372	2.82606	3.63827	5.84921	4.05876	2.33353	6.15137	6.09848	3.95596	2.40809	4.11349	4.25004	5.84946	5.30954	4.59268	2.76207	5.07539	5.06138	3.18285	2.93398	2.75732	3.35718	6.21878	low
TCGA-CV-6953	4.49589	1	4.73333	3.76099	6.39696	3.35625	3.36471	5.96798	5.04223	2.96774	6.51799	7.25662	4.55768	1.39091	4.50292	4.89248	6.47439	5.63877	5.67481	2.47241	5.32426	5.0827	3.53307	2.96203	3.77047	4.28963	6.60337	low
TCGA-CR-6477	1.40822	0	4.18508	3.6278	6.46593	2.95989	4.19495	6.36385	4.49658	2.33689	6.45458	6.43403	4.53922	1.61919	5.04951	4.7191	6.40233	5.22518	5.57034	2.42294	5.61135	5.38358	3.6647	3.23528	3.0334	3.97578	7.2675	high
TCGA-CV-A45W	3.83014	1	4.77382	4.49819	5.48547	4.90226	3.70625	5.44462	5.73665	3.65695	7.26202	7.318	5.58243	1.82751	5.14796	5.58288	6.75048	5.579	6.13192	4.02426	5.64638	6.58226	4.40533	3.67512	3.69283	4.64729	6.45813	low
TCGA-CV-7095	1.56712	1	4.13354	3.56224	6.64349	4.59563	3.76647	6.31515	7.08631	2.60554	7.13233	7.12888	4.90472	1.50208	4.81647	5.31888	6.64966	5.25201	5.66223	2.47032	6.0332	5.24241	4.56462	3.21682	2.93602	3.83192	7.39017	high
TCGA-CR-7372	2.07945	0	4.74116	4.25665	5.59802	3.34858	3.66556	4.29422	4.87449	2.36669	6.26701	6.31719	5.16954	1.88476	4.65371	4.92753	6.13042	5.68588	5.37995	3.00461	6.17258	5.45211	3.73094	3.11199	3.47911	3.83898	6.30969	low
TCGA-C9-A47Z	0.523288	1	4.44713	3.63164	6.45721	4.17613	3.88771	6.01471	5.46775	2.61503	6.97318	6.77976	4.74516	1.57119	5.00604	4.68717	6.32391	5.43662	5.61378	2.65682	5.81476	5.55118	3.45041	2.89983	3.19577	3.77346	7.00446	high
TCGA-QK-A6IJ	1.06027	0	3.63559	4.10804	5.00087	4.34215	2.55438	4.67941	7.52921	3.38158	6.8303	7.41716	4.26204	2.45781	3.65872	5.0859	6.89564	6.06759	5.32074	3.42123	4.26668	5.92208	4.19823	3.19062	2.7855	6.14509	6.70446	low
TCGA-CN-5367	0.964384	1	4.09783	3.52079	6.87039	4.95978	4.32772	5.64137	7.14071	2.6083	7.40299	7.00859	4.91641	1.67039	4.77796	5.84407	6.49192	6.54886	5.94247	2.52078	6.05796	5.54784	4.38653	3.41067	3.13203	3.97654	7.18069	high
TCGA-UF-A7JO	1.72877	1	4.99058	5.09519	5.63752	4.11372	3.62441	6.93256	5.10158	3.73378	7.70038	6.74557	5.1875	1.43513	4.53335	5.87739	7.16602	6.73271	5.59624	3.47259	5.93059	6.04069	4.47393	3.37529	2.92617	4.75112	7.39938	high
TCGA-CV-A45V	0.0876712	1	4.8997	4.06944	4.64384	3.4336	2.83356	5.98707	4.64808	3.23102	6.3816	6.51755	4.57843	1.69969	4.11367	4.92237	6.26201	5.38778	5.39382	2.83116	5.26803	5.48923	2.91062	3.22169	3.63961	4.14473	5.76989	low
TCGA-BA-A8YP	1.36712	0	5.45436	4.67146	6.00536	4.15861	3.96321	4.95293	4.70294	3.33543	6.67852	6.09354	5.62744	1.80967	6.07583	4.87012	6.3225	5.80407	6.82521	3.60249	6.03825	5.96471	5.026	3.57148	3.79926	4.91917	6.93908	high
TCGA-CN-6988	0.871233	0	4.95816	4.1997	5.80787	4.19839	2.58328	4.26097	4.68035	3.37392	6.57942	6.92115	5.25785	2.4196	5.15026	4.90589	6.75753	5.77928	5.46157	2.96627	5.88795	5.86512	3.73691	3.22812	3.76943	5.00383	5.98174	low
TCGA-CV-A45Z	4.01644	1	4.96738	4.53944	4.48174	4.0929	4.53224	5.77704	5.2307	3.10513	7.25066	6.63371	5.71497	1.80646	5.00099	4.99945	7.08731	6.06401	5.77387	3.29601	5.3731	6.43762	4.30947	3.51503	3.35425	4.70587	7.23627	high
TCGA-UF-A7JH	1.82192	0	3.97251	3.5724	5.47132	3.7438	3.39048	5.4197	4.78535	3.81335	7.36871	6.67296	5.08868	2.34088	4.7283	5.76158	6.73166	5.68744	6.05326	2.78897	5.72867	5.6222	5.45164	3.22048	2.86825	4.48634	6.53498	low
TCGA-CV-7413	0.805479	1	4.59121	4.44753	5.24848	3.642	2.78534	5.68923	5.05628	3.00319	6.47873	7.14483	4.74536	1.63193	4.63472	5.26176	6.86355	5.48367	5.43716	2.7777	5.02097	5.95411	3.32067	2.89452	2.60029	4.06802	7.00091	high
TCGA-CR-7376	2.66301	0	4.70221	4.14305	5.5614	3.05333	3.53253	5.37744	3.93364	2.47312	6.59253	5.93309	4.35863	1.80652	4.44527	4.43315	6.17831	5.68674	5.06573	2.41789	5.37926	5.14248	3.25275	3.32944	3.0832	3.67242	6.33185	low
TCGA-CN-6011	2.55616	0	4.48078	3.54386	7.16182	5.17539	4.10695	6.04292	5.2778	2.7777	5.30437	6.42434	4.72735	1.52131	4.83645	4.58318	6.68661	5.1719	5.37695	3.23803	4.87544	5.15882	3.22804	3.02579	4.31564	3.82583	5.82848	low
TCGA-BB-4224	0.761644	0	4.77482	4.67173	6.45712	4.63014	3.09264	5.01239	5.27396	3.14261	8.18562	6.90425	5.82917	1.45131	4.59819	5.74589	6.73278	5.59723	5.06862	3.00854	5.65405	6.55543	3.22461	3.74955	3.75342	4.48676	5.80319	low
TCGA-CV-A464	4.71781	0	4.79572	4.4208	6.13485	3.5887	3.1575	4.89602	4.84397	3.14998	7.51547	6.64419	5.01763	2.06548	4.81703	6.40784	6.45765	6.07347	5.57281	3.09467	7.00302	5.51232	4.70878	3.14076	2.74011	3.94285	6.68006	low
TCGA-CR-7370	0.287671	0	4.82793	3.71812	5.92916	3.89169	3.98441	5.2338	5.09211	2.53351	7.27552	5.63599	5.07861	1.72975	5.59987	5.6216	6.19618	6.37401	6.02742	3.48773	6.45144	6.61191	3.92145	3.84258	3.4447	4.27802	6.54641	low
TCGA-CQ-5330	3.81644	0	4.61622	3.70228	6.30839	3.67241	4.54358	5.68415	4.70891	3.12171	7.80543	6.84693	5.00259	1.56923	4.85898	5.17912	6.62827	6.27144	5.32074	3.06162	5.66779	5.54767	4.04912	3.31306	3.10671	4.17812	6.83728	high
TCGA-QK-A8ZB	0.810959	0	4.83257	4.40438	5.29141	4.04487	2.84348	5.00124	5.19355	3.47701	6.68896	6.24029	4.97181	1.8619	5.14262	5.08993	6.59138	5.0478	5.87172	2.87672	5.95245	5.4927	3.77695	3.19451	2.95863	3.53187	6.34498	low
TCGA-CV-7235	6.43014	0	4.25802	3.90953	6.4531	3.24026	3.38102	5.83052	6.2502	2.49933	6.96962	6.71558	4.41018	2.54066	4.01735	5.1466	6.38848	5.8492	5.69838	3.31868	4.58568	5.00141	4.06856	3.34563	3.74833	3.6349	5.73545	low
TCGA-CR-7368	3.41096	0	5.01591	3.94974	7.08385	4.08491	4.52176	4.71376	4.46804	2.53433	5.73976	5.59436	4.51537	1.61683	4.76441	4.69322	6.22983	5.84974	5.15707	3.44107	5.83994	5.86681	2.49176	3.68845	3.99077	3.76672	5.77014	low
TCGA-CN-6012	1.72329	0	4.71153	3.67531	4.21558	3.71096	3.63601	5.86396	7.50057	2.95967	7.6208	6.29903	5.01497	1.89156	4.81128	4.90799	6.31163	5.7814	5.38409	3.3221	6.50287	5.90763	3.9666	3.65956	3.67096	4.12237	6.43996	low
TCGA-CR-7401	2.95068	0	4.61909	4.07821	6.20069	2.91121	3.77341	5.43843	4.21662	2.43461	6.49446	6.45062	4.54142	2.10558	4.45862	4.64057	6.62128	5.48037	5.07447	2.54606	5.15353	5.65796	3.75421	3.03217	3.09296	3.69531	6.69964	low
TCGA-CN-5363	0.693151	1	4.6017	3.54248	7.06055	3.54211	4.323	5.81399	7.56536	2.83714	7.20632	7.48921	5.58481	1.4052	4.74521	5.79899	6.31198	5.60459	5.48962	3.00246	5.97432	5.59593	4.16754	3.50526	2.79812	4.05678	7.10611	high
TCGA-QK-A652	0.978082	0	4.57368	4.16277	5.18019	4.25199	3.9477	4.9805	4.7788	3.36604	7.12493	6.97302	4.69437	1.60361	4.71193	4.8113	6.53483	5.86902	5.22786	3.04729	5.65091	5.70205	3.79552	3.37307	3.14052	4.16192	6.64374	low
TCGA-CN-6017	1.72329	0	5.10722	3.83491	5.08685	3.19172	3.95778	5.15723	4.8461	2.68663	7.19553	6.0176	4.62204	1.86052	4.70304	4.9019	6.20284	5.91621	5.43659	2.91734	5.53825	5.4717	3.4079	3.28679	3.13705	3.84466	6.35079	low
TCGA-CV-A45O	2.33151	0	3.67599	3.87288	4.92579	3.70219	2.03114	4.56922	3.96202	3.00324	5.79906	6.64662	3.63029	1.29035	3.52169	3.71014	5.74497	4.39723	4.05464	2.32528	5.08193	4.78531	2.2831	2.61768	3.47507	3.34347	5.11503	low
TCGA-D6-6516	2.11781	0	5.57932	3.81352	5.95264	3.69993	3.44	5.04735	5.11269	2.84415	7.01851	6.70092	4.7833	2.3469	4.92631	4.70245	6.75391	6.09192	5.58226	3.32214	5.50099	5.12547	3.39517	3.31318	3.65755	3.81232	5.97504	low
TCGA-CN-6022	0.553425	0	4.96287	3.84717	6.82898	3.21086	4.29514	6.86135	4.38348	3.40637	6.8574	6.53018	5.21646	1.64938	5.21445	4.87606	6.60012	6.52911	5.89958	2.89558	5.43628	5.40421	3.73529	3.44813	3.33228	4.14512	6.8255	high
TCGA-KU-A6H8	0.89589	1	5.29577	4.30528	4.50283	3.34777	4.11766	5.02909	5.08481	3.00694	7.22192	5.98879	4.60529	2.01356	4.78374	5.0397	6.21553	5.33792	5.63489	3.12285	5.35119	6.09939	3.01577	3.23066	2.98742	4.30586	6.55994	low
TCGA-CV-6959	0.70137	1	4.36564	3.92662	7.07964	3.35141	4.10421	6.16385	4.68655	2.63697	6.58069	6.67471	5.29981	1.38829	4.66422	4.80795	6.57231	5.74688	5.41186	2.93017	5.44442	5.10072	3.42795	3.35004	3.62043	3.96874	6.48397	low
TCGA-QK-A8Z7	0.542466	0	4.82932	4.23384	4.58557	4.32117	3.37275	5.93938	4.85094	3.70867	6.79901	7.23013	4.55808	2.52411	5.75423	4.99681	6.57095	6.38006	6.19396	3.92203	5.3242	6.70691	4.79996	3.95521	3.21928	5.22372	6.9616	high
TCGA-CV-6943	1.64932	1	4.2446	4.05562	4.99756	2.93896	3.74902	5.46406	4.26812	2.71537	6.0846	6.02012	4.5034	1.85503	4.52166	4.3006	6.36503	5.28104	4.88228	2.78619	5.40266	4.9713	2.77994	3.06151	3.02923	3.47677	6.24627	low
TCGA-F7-A623	1.68767	0	5.30641	3.77931	5.45136	4.13288	3.07521	6.03113	4.83165	3.41643	7.37915	6.37726	4.735	2.14928	5.13134	5.59345	6.96707	5.14274	6.15707	3.05626	6.44404	6.02063	5.03303	3.54214	3.15745	4.3202	6.82352	high
TCGA-CR-6482	0.945205	0	4.69063	3.75087	5.75052	3.39941	4.16064	5.51069	4.62886	3.0058	6.42053	6.10977	4.8811	1.73546	5.06208	4.93222	6.68867	6.73896	5.71949	3.26827	5.70406	5.54097	4.57542	3.72382	3.77911	4.11062	6.45617	low
TCGA-BA-5559	4.7863	0	4.27325	3.52698	4.10704	4.08092	3.94065	4.72336	4.40735	3.23767	6.66976	5.61281	5.39559	1.55526	5.21466	4.75073	6.8107	5.90541	5.58784	3.69587	5.68941	5.65682	3.16792	3.76768	4.16412	3.7561	5.27422	low
TCGA-UP-A6WW	1.41918	0	3.85796	4.36949	4.14103	4.84007	3.09027	6.74347	5.31282	4.03071	6.93217	7.06097	5.31151	1.62798	3.66723	5.50511	7.1285	6.47706	4.80528	3.71657	5.8725	6.57853	3.72619	3.65484	3.00389	4.86924	6.40394	low
TCGA-T3-A92M	1.14247	0	4.15514	3.81257	5.20761	4.742	4.16637	6.47306	5.94547	3.51641	6.98673	7.00717	5.77973	3.01227	5.07837	5.29984	6.55342	6.5245	5.88114	3.405	6.16525	6.56374	4.80031	3.56952	3.52303	4.68106	6.61161	low
TCGA-CV-A6JD	0.49863	1	4.17358	4.47697	4.93393	3.44839	4.61129	4.89156	5.26719	3.15967	7.20263	6.77789	5.14312	1.3707	4.76506	5.50854	7.01774	6.44992	5.67601	3.26942	5.38298	5.84164	4.2236	3.33094	2.92428	4.04914	7.2384	high
TCGA-CN-A6UY	0.841096	0	3.64078	3.77181	4.47584	4.71196	2.71343	5.01814	5.99634	3.8906	6.54931	6.12476	4.96342	1.22927	4.21963	5.74072	6.99552	6.53055	5.71204	3.65736	5.43824	6.61478	3.45459	3.82966	3.19457	5.01526	5.9545	low
TCGA-BA-4075	0.775342	1	5.31005	4.31434	5.92206	3.03388	4.74596	5.89806	6.01032	2.8161	8.87208	7.11393	5.55678	1.31293	4.59004	7.04581	6.92198	6.05723	6.4545	2.31919	6.75142	7.16798	3.31603	2.98968	1.99395	4.41899	8.60718	high
TCGA-CN-6996	1.45205	1	5.38964	4.14851	7.2111	3.43065	4.37913	5.20821	4.75497	2.99899	7.05073	5.84876	5.05491	1.46221	4.98861	4.68213	6.35633	6.10985	5.67633	2.94071	5.63797	5.46263	3.59877	3.14762	3.65586	4.01846	6.51481	low
TCGA-IQ-A61E	3.14247	0	4.92511	4.66871	7.08752	3.67654	3.76818	6.20019	5.13581	2.96985	7.1478	7.206	4.34375	1.32294	4.64822	5.74443	6.67432	6.05943	5.45422	2.7823	6.10206	6.12997	3.80172	3.50057	3.14317	4.14443	7.43002	high
TCGA-BB-4225	0.4	0	5.11039	4.16606	5.15831	3.90953	4.21889	4.27077	5.0679	2.76143	6.94703	6.01117	5.13456	1.67119	5.13986	5.14525	7.15066	6.28932	5.67549	3.87913	5.70505	5.38542	3.91354	3.63872	3.34521	3.95601	6.44498	low

## Sheet: GEO cohort
id	futime	fustat	DLAT	FDX1	SLC16A1	RAD9A	TRIM32	PFKP	MRPL21	MTG1	MRPL15	SLC25A39	YARS2	PDZD4	RRN3	TIMM9	COPZ1	ATIC	RSL1D1	TAF6L	SRP54	NDUFB5	TOP1MT	NRF1	DOT1L	MRPS5	riskScore	Risk
GSM1049082	0.254795	1	4.77472	4.85867	6.78317	4.16333	4.40518	5.44541	4.55636	2.66161	6.42333	6.9216	3.95323	1.43808	5.09255	5.11562	6.61286	6.64396	5.44859	3.69359	5.42617	6.60961	3.99161	3.27524	2.78941	4.32759	7.88171	high
GSM1020105	3.34603	1	5.01726	4.18378	5.52034	3.51662	3.76299	6.01219	5.01626	2.7141	7.26263	6.96647	5.18532	2.67541	5.78514	4.60024	7.00174	6.08833	5.51791	3.05762	5.52468	5.8732	4.18609	3.16306	2.19111	3.96573	7.68355	high
GSM1049109	2.13151	1	4.79171	4.40439	5.84801	3.64621	3.18516	6.05369	6.2649	2.87848	7.15374	6.63126	4.85628	0.737547	4.93694	4.909	6.77111	6.02537	5.5341	2.7117	5.92501	6.0044	4.1763	3.68696	2.78565	3.95184	7.63452	high
GSM1020113	0.588493	1	4.12234	3.68186	7.03267	4.31628	4.77978	6.11629	5.822	2.59028	7.20424	6.8143	5.35259	1.65418	5.28867	6.1449	6.5883	6.46606	5.97461	4.23139	6.26213	6.55198	5.13018	3.46927	2.8976	4.86957	7.60514	high
GSM1049139	1.85753	0	5.23988	4.31586	6.40111	3.55403	4.20893	6.84551	4.07771	2.83259	6.96274	6.02086	4.81133	1.35892	5.53632	5.40333	6.5679	6.0763	5.81496	2.68039	5.77165	6.45995	4.60993	3.2723	3.21818	4.27654	7.59958	high
GSM1049119	1.74795	0	5.52501	4.63498	5.87453	3.32582	3.55728	5.58257	5.83777	2.54149	8.0076	5.88311	4.92163	1.20716	4.66442	5.93213	6.12028	6.03202	6.40541	2.5175	5.29613	6.90589	2.63903	3.17896	2.46417	4.81102	7.48277	high
GSM1020099	5.16575	0	4.34304	3.9651	7.41207	4.23387	3.86772	5.3996	7.23601	2.22342	5.55262	7.14114	4.50037	1.67308	5.19851	4.47947	7.00974	5.67216	5.20538	3.48967	5.31912	5.63936	4.62477	3.25698	3.30552	3.91396	7.47333	high
GSM1020131	2.04411	1	4.48294	4.0274	6.85275	4.80258	2.6645	6.18066	7.38945	3.6766	7.73354	7.40915	4.82897	1.48425	5.49027	5.80694	7.31358	6.35988	6.1561	2.77093	6.16342	5.55989	4.92572	3.58253	3.0503	4.43673	7.44346	high
GSM1020109	1.16384	1	3.65741	3.52964	7.02794	3.37602	5.34463	6.34706	6.19436	2.719	6.08047	6.28643	5.08525	1.67621	4.64379	5.07022	6.3044	5.1413	5.39048	2.89878	5.9882	7.13825	3.7707	3.24641	3.37548	4.36381	7.4097	high
GSM1020194	4.42849	0	4.87849	4.38062	5.92943	3.51131	3.53449	6.62	4.32517	2.68684	6.87592	7.60004	4.61285	1.76501	4.49857	4.16547	7.094	5.87659	5.07375	2.66176	6.07254	5.04629	3.66211	3.45873	3.1493	3.75209	7.40339	high
GSM1049147	0.534247	1	4.82303	4.10709	7.04666	3.33982	4.56017	5.5715	4.23173	2.77961	7.55785	7.07465	5.21178	1.78227	5.41059	4.34871	6.97938	6.70511	5.34142	3.73501	6.12827	5.68733	3.75317	3.37597	2.97162	3.81302	7.3769	high
GSM1020101	0.537534	1	5.18107	4.05447	6.51533	3.56029	4.8248	5.42072	5.32508	3.63666	7.81205	6.95285	5.74914	1.75644	5.98005	6.7029	6.49233	7.74004	6.01602	2.92534	6.2782	5.81277	5.71359	3.7145	3.13239	5.01199	7.31548	high
GSM1020119	6.58849	0	4.4261	3.68231	5.39558	2.67995	3.80278	5.32644	5.06136	2.73008	6.68368	7.00924	4.62509	1.60911	4.74026	5.08251	6.45869	5.37535	5.63404	2.84093	5.56561	6.3287	3.68933	3.22721	2.65596	4.18115	7.31315	high
GSM1020121	1.26658	1	4.78327	4.03426	6.72339	3.29051	3.97164	5.98477	4.65422	3.08259	6.64012	6.58261	4.77624	1.74423	4.75478	4.93118	6.66164	6.05569	5.99894	2.9	5.48532	6.03368	3.47021	3.01304	2.67856	3.91952	7.3113	high
GSM1020100	4.57479	1	4.92611	4.33879	4.93288	3.40403	4.35593	4.52765	4.96834	1.88759	6.93342	6.0715	4.65773	1.63118	5.20301	4.87419	6.19755	5.86244	5.34142	3.12057	5.89798	6.3144	4.15243	3.30933	3.09942	4.05556	7.30887	high
GSM1049114	0.350685	0	4.81955	4.00142	4.68811	3.92114	3.71605	6.40309	5.27765	3.29646	7.2906	6.74826	4.26862	1.36322	4.64434	5.22636	6.44065	5.9345	6.57872	2.7566	5.40131	5.6904	3.78279	2.879	3.09942	4.08054	7.29952	high
GSM1049080	0.136986	0	4.58257	4.57562	4.80717	3.86808	3.12904	5.83481	5.30125	3.22127	6.48927	6.90616	4.77063	1.70067	4.80907	4.57963	7.17082	6.4696	5.30682	3.5232	5.21053	6.3144	3.80828	3.06095	3.21334	4.65	7.16929	high
GSM1020124	1.99315	1	4.99676	4.36046	6.07433	3.56958	4.30852	5.99413	4.91582	2.8823	6.76027	6.77805	5.9602	1.74142	4.84784	4.81795	6.91373	6.63776	5.77743	3.16948	5.58686	5.36535	3.42946	3.19525	3.02692	4.37519	7.15306	high
GSM1049136	0.720548	1	5.06208	4.20893	7.90017	3.83845	4.24351	6.68387	4.61414	2.79587	6.91577	6.34709	6.05988	1.31173	5.43809	4.92235	6.98372	6.61619	5.2786	3.01765	6.00622	6.05391	4.13722	4.16106	3.29482	4.55142	7.14447	high
GSM1020110	0.826027	1	4.78223	4.41123	6.75259	3.32543	4.2743	6.32981	5.51355	3.08754	8.29369	7.019	5.41619	1.32359	5.50813	5.35761	6.75293	5.59071	5.23108	3.49831	6.05023	5.78246	4.11912	3.64202	3.07042	3.9275	7.14316	high
GSM1049167	1.78904	0	4.88318	4.63115	6.93727	4.07065	4.948	6.10953	5.28644	3.36002	7.51555	7.0853	5.38679	1.73549	5.26653	4.59909	6.65518	6.18282	5.18452	3.2359	5.97013	5.74539	4.08039	3.54952	3.35649	3.73006	7.13553	high
GSM1049117	4.35342	1	4.65848	3.99038	5.04395	3.92399	4.24439	5.86834	5.43189	2.88686	7.2481	6.84271	5.08525	1.80451	4.59271	4.50324	6.67798	5.87068	5.99989	2.88944	5.83239	6.06234	3.86018	3.29171	3.47335	3.88601	7.11983	high
GSM1020157	0.19726	1	4.88318	3.95785	7.38333	3.71723	5.3383	5.90757	4.54867	2.89257	7.61417	6.79216	4.98952	1.71818	4.78602	5.3802	6.85219	6.08698	5.82052	3.05722	5.59358	5.79732	4.19609	3.44828	3.43823	3.98176	7.11867	high
GSM1049081	2.85479	0	4.5406	4.34923	6.49636	3.28351	4.10913	5.60567	5.38109	2.5045	7.06261	6.76563	5.22141	2.15591	5.08331	5.7992	6.75103	6.03778	5.32173	3.62273	5.73431	6.4709	4.27312	3.24236	3.09779	4.54741	7.09587	high
GSM1049173	7.72055	0	4.36004	4.27058	5.08512	3.49705	2.98071	4.65632	4.21084	2.44085	5.01841	6.23994	4.97791	0.965271	5.89051	5.21224	6.70822	6.30706	5.572	3.39073	5.88244	5.75955	3.40962	3.77611	2.68075	4.43804	7.09418	high
GSM1049099	0.854795	0	5.11439	4.77062	6.55186	3.36188	3.73044	5.0805	7.20404	3.45502	7.91199	5.98263	5.24901	1.35071	4.19932	5.95732	6.61908	6.22775	6.51602	2.67088	5.04629	7.15599	2.94148	3.17495	2.59417	3.90452	7.08221	high
GSM1049128	1.03836	1	4.46108	3.89914	4.60147	3.39982	3.92442	5.8935	5.21657	3.45384	7.22772	7.58739	4.62647	2.21972	4.06714	5.19882	6.93267	6.69053	5.70148	2.81148	5.96565	5.72904	4.00812	3.21652	3.17952	4.17388	7.06899	high
GSM1020125	0.480822	1	4.70551	3.63387	6.45296	4.48346	5.24146	5.47053	6.04097	3.37997	8.11393	6.76757	5.55951	1.36178	5.50516	5.78146	6.56634	6.27988	4.91837	2.9073	6.61409	6.07559	4.85997	3.75089	3.24946	4.40901	7.06683	high
GSM1049146	4.05205	0	4.88748	4.2248	4.63402	3.59448	3.63504	5.53363	5.3355	2.7558	6.74333	7.09132	4.76262	1.54286	4.63046	4.7608	6.44745	5.66685	5.73498	2.9073	5.38333	5.90677	3.09918	2.80697	2.97993	3.59393	7.06314	high
GSM1049151	1.92329	0	4.61995	3.97742	6.77644	3.81196	4.59261	5.55967	4.6125	3.32634	7.55307	6.58439	5.21966	1.72804	5.02359	4.67125	6.7031	6.47495	5.37328	3.11888	5.77962	5.98839	4.42088	3.34746	3.09673	4.19061	7.06212	high
GSM1020174	0.75863	1	4.66392	3.91742	6.29852	3.06228	4.51378	5.34385	4.55324	2.98027	7.64189	5.35489	4.91701	1.62347	4.6685	5.38364	6.53775	6.58663	6.297	2.62695	6.03921	5.17227	3.85517	3.17167	2.92347	4.31144	7.03579	high
GSM1020172	4.92822	0	4.59851	4.20834	6.2336	3.47286	3.66457	5.27896	4.06245	2.81825	7.02294	5.76536	4.62037	1.40519	4.58524	4.81795	6.29936	6.06815	5.65037	2.78796	5.53981	5.88099	3.79097	2.63392	2.74472	3.97421	7.02985	high
GSM1020185	0.537534	1	3.70308	3.60203	6.54662	4.02637	3.82365	6.34163	5.03624	2.64894	7.43408	6.22272	4.76468	1.77268	4.80615	5.23678	6.46142	5.98542	6.61174	2.82785	5.87985	5.70095	4.94299	3.26155	3.32844	3.62259	7.0069	high
GSM1020134	2.39507	1	4.30218	4.49146	5.14477	3.1938	3.21639	5.84004	4.1464	2.51488	6.17962	5.89927	4.78071	1.65037	4.91336	3.6002	6.17693	5.81222	5.5504	2.82131	5.59239	5.00889	2.70123	3.23412	2.81029	4.34338	6.99814	high
GSM1049172	0.0849315	1	4.49666	4.09338	7.19296	3.59568	2.88458	5.74769	5.64246	2.93017	5.67047	6.44756	6.38129	0.98096	5.99089	4.91148	6.77998	6.05984	5.77791	3.88591	5.415	5.61923	4.87739	3.44661	2.6651	4.14424	6.9872	high
GSM1020158	0.877808	1	4.40895	3.81892	6.27434	3.99373	3.54627	5.21647	7.12951	2.65726	6.15466	6.29995	5.13747	1.67916	5.66066	5.05978	6.85417	5.64867	5.84168	3.23636	5.24199	6.6825	3.91837	2.98222	3.54872	4.17085	6.9692	high
GSM1049162	3.35616	0	5.10731	4.31358	5.98341	4.12534	2.89693	5.84424	4.61831	2.35067	7.13723	6.93476	4.82612	1.60424	4.93639	5.26746	6.31888	6.1487	5.90792	2.79651	5.99273	5.74539	4.1477	3.18859	3.72817	4.90379	6.95023	high
GSM1020112	6.69945	0	5.0167	4.68867	7.1161	3.04538	2.93407	4.78201	5.01076	3.25195	7.16188	6.4261	4.84673	1.68405	5.12558	4.94543	6.68271	6.0709	5.44535	2.92378	5.53881	6.26694	4.22986	3.43086	2.97464	4.51378	6.93739	high
GSM1049092	4.21918	0	3.93185	4.01828	6.71362	3.65263	4.07997	6.13582	5.34026	2.92882	7.32908	6.88479	4.36672	1.51649	4.90237	5.48932	6.63244	6.13609	5.59487	3.23425	6.01103	5.7114	3.88131	3.76434	3.25662	3.75496	6.9223	high
GSM1049164	4.14795	0	4.84301	3.86429	4.88384	3.37602	3.8767	5.65468	6.60628	2.87914	7.22772	6.71889	4.59045	2.40396	4.54608	5.32644	6.52404	5.87068	6.3153	2.92963	5.64891	6.20124	3.78734	3.08311	3.58911	4.38136	6.90173	high
GSM1049156	4.0274	0	4.55037	4.22535	5.47632	3.66967	3.55681	4.69243	4.78422	3.09179	6.81442	6.56658	5.77223	2.06791	5.25784	4.55333	7.18241	6.21071	5.37754	2.76025	5.79834	6.1098	4.36435	3.01461	3.09066	3.64658	6.88329	high
GSM1049169	1.80274	0	4.71854	4.35154	5.61501	3.86765	4.15701	5.69679	5.2014	3.06314	7.55531	6.72996	4.88727	1.9437	4.8473	5.51552	6.69612	6.14022	5.58291	2.80967	6.09319	5.52805	4.29866	3.19727	3.49819	4.04889	6.87188	high
GSM1049143	0.446575	1	4.84099	3.63811	7.4499	3.44773	4.44704	6.25917	4.75255	2.87734	7.47885	6.82886	5.17183	1.03168	5.11539	4.98043	6.51497	6.15765	4.91837	3.13015	6.48977	5.75562	4.65058	3.93731	3.73596	4.11218	6.84718	high
GSM1020191	0.688767	1	5.02218	4.02849	6.43204	3.55441	4.18668	6.9553	5.04853	2.12066	7.62001	6.61477	5.63972	1.80524	4.90464	6.82043	6.67306	5.95748	5.35168	2.71895	7.04465	5.29813	4.03256	3.06838	3.51264	3.84551	6.84539	high
GSM1049177	0.0191781	0	4.22296	4.21066	5.59251	4.11708	3.7891	4.98224	6.05991	3.08989	7.26652	6.8653	5.11764	2.80947	4.92371	4.98288	6.67946	6.2078	5.56209	3.33688	5.63011	5.86945	4.71292	2.97838	2.99933	4.26663	6.82855	high
GSM1020164	5.05808	0	4.48418	3.84721	6.04692	3.79469	3.73387	6.49507	5.17093	3.25041	7.16379	7.00138	5.41993	1.63221	5.00777	5.30028	6.87248	6.96073	5.70614	2.90269	5.33973	5.72548	4.48186	3.22098	3.90222	5.21021	6.82829	high
GSM1049107	0.0958904	1	4.02999	3.61378	6.28663	3.56879	4.30659	5.55589	5.97729	3.33673	7.00611	7.13381	5.07344	1.52752	4.86287	4.94543	6.4714	6.37491	5.76847	3.21852	5.91226	4.95236	4.38356	3.35901	3.29313	3.9822	6.82456	high
GSM1020149	5.76	0	5.43149	5.02841	4.86244	3.78957	3.64683	4.32756	5.28317	2.39153	7.73354	6.39377	5.34384	1.5354	4.63709	5.19814	6.67946	5.86704	5.42891	2.9073	5.72162	5.73243	4.26025	3.38577	3.58911	4.67663	6.82384	high
GSM1049175	1.28767	1	4.35756	3.78531	5.71535	4.52602	3.37811	6.32845	7.23402	3.62502	7.14274	6.97087	4.96472	1.71746	4.73239	5.43848	7.10702	6.56696	5.48004	3.19633	5.66556	6.52946	4.72046	3.41877	3.66578	4.54471	6.82164	high
GSM1020195	4.32329	0	4.1643	3.94963	5.13526	3.80032	3.26729	5.41456	6.72266	2.62904	6.22202	6.14426	4.6336	1.36665	5.03004	4.8162	6.95953	6.19761	6.01848	2.82239	5.02062	6.14828	2.98377	3.81608	3.2282	3.70328	6.80645	high
GSM1020106	6.92384	0	5.72929	4.67034	6.58847	2.63402	3.37121	5.61988	5.19433	2.67879	6.73882	6.57743	5.36064	1.74938	5.41638	5.13335	6.51497	6.11242	4.80862	3.26981	5.64527	5.54732	3.84701	3.00416	3.22922	4.45175	6.80101	high
GSM1020118	1.25836	1	4.93507	4.21784	7.28468	3.01657	3.81721	6.33064	5.00462	3.05545	7.32908	7.69553	5.80315	1.74248	4.69381	5.24088	6.90275	5.74549	4.62088	3.3347	5.75384	6.15705	4.50221	3.52821	3.29847	4.29936	6.79224	high
GSM1020166	5.0737	0	4.51266	3.62906	6.8266	3.48718	3.35526	5.91716	5.4546	3.6766	7.77604	6.7241	4.80232	1.6851	4.76863	5.69468	6.91157	6.59021	5.51535	3.26263	5.99126	6.49769	4.1116	3.69913	3.16415	5.23606	6.79155	high
GSM1020193	4.47205	0	5.52054	4.0534	5.37142	3.80433	3.25696	6.8715	4.86354	2.75329	6.68621	6.59121	5.11608	1.80886	4.51695	4.7061	7.19177	5.86578	5.86957	3.23546	5.42312	5.46163	3.56189	3.14457	3.41764	3.93126	6.7736	high
GSM1020123	1.79014	1	3.89429	3.317	7.3986	3.78528	4.68899	6.21655	7.63123	3.63018	7.60067	7.1829	5.81274	1.62661	5.46884	5.43314	6.57606	5.96723	5.04577	3.07438	5.96264	6.27655	4.30059	3.82937	3.28041	4.22199	6.76701	high
GSM1020107	3.85315	1	4.65939	4.88449	5.93374	3.77382	3.6015	6.15917	4.79514	2.89676	7.29481	6.62951	5.18866	1.7654	4.84674	5.55882	5.8784	5.83175	5.26871	2.84438	5.71416	5.30374	4.6525	2.69986	3.17379	4.16426	6.75126	high
GSM1020133	6.31644	0	4.23209	3.76097	6.45487	5.98172	3.50515	6.51293	7.50435	2.89116	6.7758	6.86598	4.64483	1.72068	5.58492	5.20756	5.92188	5.78661	4.91589	2.96211	5.84716	6.21042	3.93027	3.37885	3.45609	4.80255	6.74759	high
GSM1049141	1.52329	1	4.35879	3.92749	7.4192	3.12272	3.64061	5.78057	3.76564	2.39481	5.93023	5.48596	5.00765	2.40993	5.00777	5.09723	6.76926	5.26782	5.59984	3.01484	6.01103	5.83924	3.75972	3.72955	2.42971	3.74211	6.73568	high
GSM1020168	5.02027	0	4.19545	3.90655	6.04486	3.88319	3.75509	6.66669	5.45241	3.45671	7.57066	6.8575	5.013	2.49292	4.12024	4.96975	7.2606	5.44344	5.08484	2.94935	5.76259	6.65823	3.5905	2.94414	3.32844	4.23366	6.7262	high
GSM1020146	0.529315	1	5.02991	4.78495	6.1489	3.50408	3.18763	5.44153	4.9936	2.84829	6.69696	6.86464	4.32669	1.63044	4.94665	5.10564	6.31756	6.2324	5.74024	3.23793	5.27426	6.3624	3.73961	3.16767	3.8242	4.26314	6.71148	high
GSM1020180	4.73671	0	4.59713	3.96312	5.45865	3.75705	3.28336	6.11288	5.46828	2.50185	6.02142	6.91716	5.13656	1.71268	3.68017	4.74638	7.40467	5.47808	5.57787	4.1619	5.33384	8.33751	4.20158	3.48453	4.24234	4.36993	6.70375	high
GSM1020177	4.82548	0	5.63905	4.48008	6.44926	3.52213	2.98486	4.99997	5.14785	3.41648	7.16733	6.5145	4.62242	1.62489	4.73609	5.34051	6.6375	6.20495	5.8314	2.85855	5.9567	5.84285	3.18312	3.22142	3.09176	4.27025	6.6798	high
GSM1020145	1.01014	1	5.86862	4.33764	5.80936	3.7629	3.26027	6.07245	4.91701	3.3271	7.15015	6.49711	5.28501	1.60876	4.70472	5.41437	6.29799	5.29532	5.898	2.85173	5.43342	6.36712	4.19188	3.1806	3.33009	4.76609	6.65019	high
GSM1049149	2.43836	0	4.44839	3.80293	6.00258	4.05909	4.52468	5.33436	4.78573	3.35882	6.96619	6.80207	4.68266	2.13324	4.90975	4.52054	6.94219	6.31039	5.41589	3.37966	5.85284	5.43244	3.54146	3.17004	3.40588	3.81225	6.64059	high
GSM1020114	0.594247	1	3.18309	2.50237	6.42448	3.97388	5.64259	5.88402	6.4918	2.79587	7.74284	6.72996	5.574	1.28867	4.83574	5.67467	6.27351	5.89963	5.75915	4.73059	6.40613	4.88883	4.83492	3.58755	3.05582	4.25102	6.6384	high
GSM1020132	1.65288	1	5.17923	4.48795	4.98438	3.96598	3.78101	6.4661	5.3355	3.60398	6.54182	7.59038	5.1152	1.73475	4.83189	5.29464	6.3538	5.47434	6.09039	2.87789	3.88775	6.25709	4.27648	3.24604	3.85021	5.1822	6.62515	low
GSM1020136	6.17014	0	4.66077	3.8135	5.05825	3.3527	3.17124	5.7144	4.60878	2.74471	6.6812	6.61543	4.68847	1.65384	4.22761	4.50751	6.40468	5.96857	5.55003	2.9347	5.27426	5.50147	3.60871	3.15184	2.97162	4.08709	6.62415	low
GSM1020159	5.37945	0	4.45674	3.75738	5.73584	3.85887	3.60027	5.98751	6.01143	2.82286	7.13385	6.46791	4.77624	1.66263	4.52376	5.17418	6.49233	5.03526	5.70192	2.87144	5.44918	5.5314	3.87011	3.38577	3.18906	4.23706	6.6219	low
GSM1049124	2.8274	0	4.32151	3.7028	5.43129	3.28683	3.94641	5.11606	5.53947	3.36981	7.29481	7.07397	4.71261	2.2181	4.18845	4.36179	6.25185	5.92194	5.81185	2.98084	5.67168	5.69388	3.14174	3.10761	3.07507	4.18073	6.62177	low
GSM1049100	0.964384	1	4.76667	3.74228	7.30695	3.16325	4.08537	5.50161	5.71424	3.13904	7.32228	6.68057	5.89252	2.23708	5.36406	5.01017	7.25836	6.61619	5.39814	3.2359	5.46528	6.30448	4.35822	3.47684	3.61717	4.3391	6.60633	low
GSM1020186	4.72849	0	4.10426	3.57151	5.8221	4.61586	4.48486	6.42629	7.55192	3.47158	7.54853	7.14927	5.55414	1.71856	4.74084	6.17038	6.14855	5.80998	5.30826	2.85557	7.20015	5.61262	3.73866	3.32487	3.15992	3.4864	6.60596	low
GSM1020171	4.98493	0	5.4675	4.33245	5.07611	4.24702	3.46455	4.58615	4.90678	2.77035	6.13484	6.02449	4.58524	1.45518	4.70819	4.79008	6.95197	5.80141	5.17115	2.76436	5.64059	6.42759	2.65176	3.50505	3.15456	3.79411	6.59593	low
GSM1020155	5.47068	0	3.61993	3.40797	4.54248	4.33258	3.54627	4.80692	4.60625	2.5596	6.89412	6.16191	3.8959	1.72593	4.53953	4.95112	6.62075	5.7543	5.77883	2.49867	5.43655	5.96742	3.07675	3.1583	3.4744	4.67838	6.58737	low
GSM1020130	0.289315	1	4.58204	3.8898	6.27034	3.65379	4.34242	6.006	4.99483	3.67573	7.65868	6.80532	5.02686	1.4704	5.05078	4.95738	6.68113	7.08254	4.77677	2.86812	5.61301	6.25709	4.0526	3.22921	3.67072	3.9759	6.58377	low
GSM1049133	2.32055	0	4.87393	4.23034	6.63896	3.47785	2.61029	5.9186	3.78616	2.44085	6.32172	5.96835	5.28933	0.710875	5.1513	5.21288	6.32707	5.83648	5.47693	2.33174	5.67524	5.56278	3.44508	3.46138	3.21655	4.22244	6.56131	low
GSM1020154	5.47397	0	3.54203	4.25298	5.50214	3.44318	2.78302	5.15715	4.44113	3.65706	5.87512	7.17711	4.50107	1.78116	4.61954	4.99949	6.89304	5.53032	5.72156	2.71716	5.82317	5.86538	3.34679	3.28139	3.22291	3.89622	6.55592	low
GSM1049120	0.654795	1	4.54732	3.87286	5.98298	4.09251	4.36008	5.65862	5.24793	3.33298	7.00075	7.1282	5.34471	0.892193	4.74949	4.67619	6.15096	6.13316	5.2476	3.21144	5.63011	5.27258	4.40189	3.35901	3.62704	4.11298	6.55377	low
GSM1049150	1.38904	0	4.85481	4.23366	5.56023	4.23698	3.84183	5.37935	5.31013	2.76565	7.24609	6.64678	4.85861	1.88787	5.20701	5.44585	6.20473	5.82138	6.5016	2.9	5.73172	6.27655	3.85199	2.95283	4.18913	4.0378	6.55324	low
GSM1020139	1.21233	1	4.83628	3.96714	5.18792	3.46879	4.16795	5.47689	4.19015	2.66945	6.58362	6.50383	4.85263	1.64222	4.87174	4.89432	6.46006	6.08833	5.90226	3.03717	6.06625	5.22329	3.29819	3.30385	3.63644	3.58922	6.53802	low
GSM1020104	6.98877	0	4.03394	3.94722	4.25419	2.73137	3.04092	5.42958	4.73937	2.99924	6.70237	5.50073	5.09354	1.56755	5.29332	4.98169	6.39685	6.25581	5.86866	2.7663	5.95521	5.93426	3.24771	3.93823	2.99281	4.57153	6.53649	low
GSM1049095	0.843836	0	4.51645	4.24195	5.86759	3.75314	3.36181	4.8221	5.46609	2.16374	6.38765	6.13951	5.21543	1.75256	4.41863	5.81205	6.545	5.84482	5.40871	2.61852	5.48849	6.00046	3.31621	3.00685	2.88304	3.81947	6.53237	low
GSM1020103	2.35233	1	5.24126	4.5977	6.89244	3.60697	3.64266	5.16818	5.09237	2.74438	7.33146	6.75143	4.43283	1.65492	4.54058	4.76629	6.09936	5.195	4.91589	3.28189	5.68873	5.93855	3.74275	3.4558	3.20805	3.84551	6.52815	low
GSM1020162	2.88658	1	4.1586	3.6358	6.82503	4.78748	4.05532	6.09455	7.51146	3.62502	5.81046	7.31599	5.24191	2.15281	4.75905	4.81212	6.51219	5.88999	5.64574	2.96648	5.54521	5.90294	3.91925	3.98856	3.36028	4.12197	6.52089	low
GSM1049125	0.350685	1	4.0191	3.76464	5.99869	4.07027	3.33016	5.95329	5.26615	3.04685	7.23586	6.85815	4.87408	1.75927	4.82584	5.12296	6.41226	6.1636	5.42619	2.73099	5.69725	5.73858	3.91475	3.13029	3.34461	4.0185	6.50785	low
GSM1020108	6.81534	0	3.17264	3.68416	4.9878	3.85602	3.56308	5.75835	5.77389	2.59462	5.89752	6.34174	4.73336	1.72559	3.62392	5.07088	6.19139	5.53032	5.70314	2.82864	5.45294	5.82405	2.98998	3.40825	2.93032	4.40513	6.50717	low
GSM1020188	4.60438	0	3.99983	3.54039	4.24394	4.38717	3.47143	6.79762	7.41347	3.67338	6.11397	6.83495	4.36732	2.35344	4.95352	4.73908	6.44745	6.3699	6.21152	3.1233	5.48066	6.53555	3.23285	3.70427	3.65921	3.95795	6.50712	low
GSM1020144	5.62767	0	5.00891	4.47709	5.80575	3.26924	3.43734	5.49655	4.93858	3.23784	6.77853	6.90685	4.59312	1.63317	4.49901	4.75725	6.35245	5.94089	5.98035	3.81102	5.11529	5.68112	3.16287	3.21893	3.30342	4.28929	6.50363	low
GSM1020192	4.48521	0	4.64048	4.1921	5.71139	3.80239	3.40372	4.89137	4.3849	2.73683	6.29854	6.87876	4.68771	1.66436	4.81067	4.71414	6.19993	5.03302	5.86432	3.02324	5.43842	5.48013	3.30769	3.17578	3.13546	3.75627	6.49495	low
GSM1049116	2.06301	0	4.56422	3.84268	5.97474	3.89615	3.52564	5.76628	4.31129	3.09469	7.18828	6.93333	5.00293	1.48287	4.3417	5.13787	6.69612	5.96857	5.58533	3.14097	5.62446	5.30633	3.99806	3.49378	2.95038	3.83204	6.49044	low
GSM1049093	2.36986	0	4.18046	3.76573	6.40639	4.16998	4.21524	5.61714	6.55521	3.7599	7.02131	7.33588	5.12193	1.77822	4.59128	5.57734	6.56634	5.64447	4.77055	2.75471	5.19393	6.08427	4.60332	3.36677	3.34304	4.54294	6.45298	low
GSM1049122	4.54247	0	4.33481	3.39628	7.15047	3.36453	3.85554	6.55204	4.24976	3.25601	7.70266	6.62302	4.99106	1.81436	6.01105	6.49099	6.32985	6.25112	5.26561	2.82827	6.04874	5.80087	4.94007	3.58795	3.35274	4.56924	6.45211	low
GSM1049104	2.90411	1	5.12066	4.27751	6.31428	3.27731	4.09622	5.18982	7.03468	3.55455	8.14533	6.60331	4.7981	2.12393	3.95064	5.96268	6.62413	6.00064	6.76021	2.82864	4.98659	7.06176	3.15489	3.43208	4.01456	5.00157	6.45136	low
GSM1020156	5.36055	0	4.76721	3.81991	5.3392	3.26703	2.86704	4.46819	5.63459	2.57015	7.48148	5.17954	5.28324	1.65248	4.44285	5.74397	6.2953	5.61956	6.22254	2.86119	6.68314	5.78246	3.91035	3.0944	2.82049	4.09799	6.44913	low
GSM1020140	6.01397	0	5.23791	4.88515	4.68365	3.8491	3.13028	5.26764	4.90991	2.78756	7.59811	6.90685	4.42166	1.72238	4.63294	5.30231	6.22099	5.04389	6.07072	2.86501	5.59936	5.96317	4.10096	3.75696	3.72929	3.86811	6.44534	low
GSM1049176	4.60274	0	3.92145	4.41599	6.74683	3.50673	3.17287	5.60821	5.75264	3.17033	6.94757	6.81627	5.45101	2.60861	4.56626	4.65287	6.78704	5.71746	5.11425	3.48924	5.45196	6.29542	3.84197	3.02496	3.25053	4.50123	6.44302	low
GSM1020138	6.13479	0	4.38062	4.00253	5.50103	3.67079	3.95467	4.77428	5.00078	3.33254	7.15776	7.27864	5.33127	1.54148	4.87395	5.42718	6.99776	5.93951	6.12678	3.88634	4.83718	5.51775	4.70419	3.57365	3.29428	4.08421	6.41552	low
GSM1020153	5.55205	0	4.29084	4.26267	6.5589	3.45684	4.32763	4.31048	4.26312	3.27066	6.61169	6.74951	4.35196	1.55294	4.57988	4.66217	6.54954	5.67433	5.48594	2.87181	5.45294	5.7671	3.04075	3.67006	3.39405	3.68774	6.41003	low
GSM1020142	6.02137	0	4.7114	4.12039	6.50022	3.59119	3.38983	6.21724	5.40041	2.65119	6.69696	7.19642	4.77125	2.36588	5.23005	5.55966	7.09202	5.24635	5.32758	3.57981	5.57019	5.96742	3.41818	4.18285	3.25662	3.89017	6.39331	low
GSM1020127	6.48904	0	3.7409	3.97688	6.79687	4.38339	3.59643	6.26778	4.92917	2.80485	7.09208	7.54869	4.71545	1.61437	4.85231	4.59154	6.51668	5.37717	5.23829	2.97884	5.47627	5.06654	4.33934	3.02001	4.33027	4.11464	6.3835	low
GSM1049091	1.66575	1	4.76018	4.09817	6.21336	4.3605	4.57023	5.83285	5.67	2.77864	7.41723	6.98608	6.32049	1.81777	4.61006	5.46602	6.40396	6.07211	5.51535	3.03443	5.37952	5.77093	3.37259	3.1478	3.43225	4.26535	6.37145	low
GSM1049098	2.43836	0	3.7951	3.51709	6.34788	4.30907	3.98592	4.98286	5.05819	2.71588	6.89883	6.7993	5.04117	1.73725	4.66489	4.84772	6.84114	6.70511	4.93544	3.12819	5.26759	5.50757	3.44229	3.21731	3.13441	3.92296	6.3495	low
GSM1049145	2.22466	1	5.21949	4.22423	5.42286	3.5622	3.56482	4.35011	4.48639	2.75025	7.49602	5.97169	4.65214	1.82661	4.79419	5.31399	6.35104	5.5926	5.81009	2.85557	5.2187	6.77165	2.95092	2.91698	3.27772	4.06774	6.3438	low
GSM1020176	0.567123	1	4.26621	4.15333	5.76226	3.0169	3.5269	5.87485	4.24271	3.17335	6.78147	5.95164	5.62899	1.6283	4.26039	4.93301	6.38278	5.9295	5.82832	2.80929	5.7835	5.18822	2.94333	3.25495	2.88097	4.10631	6.31982	low
GSM1049180	0.473973	1	3.86055	3.5324	6.44306	4.87645	4.06569	5.0694	6.88044	3.19091	7.16908	6.76818	4.98181	2.16408	4.94434	5.58737	6.47731	6.58488	5.42973	3.63282	5.5553	6.27175	4.46409	3.59734	3.45073	4.77831	6.318	low
GSM1049083	1.83562	0	4.13078	3.89914	6.74384	4.36145	5.08008	6.06989	5.76185	3.20876	7.26652	6.94304	5.53674	1.74074	4.61105	5.84132	6.59596	6.02276	4.95537	3.19474	5.64891	6.02914	4.39058	3.41917	3.90339	4.23014	6.30531	low
GSM1020151	5.58411	0	5.73705	4.23922	7.06502	3.88492	3.29298	6.0396	4.58009	2.92563	7.15572	6.94499	5.16588	2.00026	5.13737	5.9288	6.66488	6.24947	5.5902	3.3941	5.71666	5.73858	4.09999	3.63937	3.42029	4.31192	6.30368	low
GSM1020170	5.01452	0	5.03982	4.12102	4.56618	3.32345	3.20724	4.95037	4.42036	2.70099	6.3898	6.17339	4.47639	1.67123	4.16967	4.20303	6.23218	5.59572	5.89137	2.80038	4.23267	5.7078	3.21298	3.02193	3.14194	3.97718	6.28593	low
GSM1020120	6.64027	0	3.91364	3.71996	6.83992	3.36873	3.53288	4.91594	4.90991	2.68921	7.22987	7.24071	4.96472	1.71156	4.86183	5.07728	6.4998	6.20924	5.23756	2.94388	6.07087	5.04629	4.49205	3.66386	3.43823	3.39926	6.28312	low
GSM1020160	5.22247	0	4.54595	4.03273	5.40131	3.54378	3.39027	4.84088	4.39289	2.70296	6.82017	6.91716	4.72371	1.74552	4.85732	5.12237	6.44745	5.83175	5.4608	3.03487	5.31809	5.78246	3.64578	3.32048	3.70589	4.26356	6.19957	low
GSM1049105	2.53973	0	4.44162	3.91436	6.47835	4.1274	3.23001	6.15063	5.71846	2.74134	7.18434	7.14756	4.61285	1.83913	4.61659	5.12543	7.09202	5.75537	5.42387	2.99477	5.79955	5.09617	4.01048	3.69345	4.10006	3.5632	6.17247	low
GSM1049103	1.70685	0	4.29824	3.83347	4.90861	2.67499	3.71397	4.46134	5.38537	2.33518	6.2518	5.96703	5.14706	1.78724	4.66088	5.81966	6.4054	4.87368	5.62756	2.8239	4.91849	6.05828	3.01462	3.09907	2.93179	3.87422	6.17145	low
GSM1020179	5.16575	0	4.43296	3.87541	6.33091	3.59905	3.16646	4.22825	4.30615	2.60184	6.70237	5.08583	5.12025	1.56543	6.09946	5.52101	6.856	5.69862	7.02827	2.79926	5.15748	6.20124	3.85604	3.41794	3.90957	3.84551	6.1127	low
GSM1049094	2.16712	0	4.33161	4.24301	6.92985	3.661	3.5547	4.95709	6.05575	2.17131	6.96092	6.25909	5.55191	2.40652	4.43856	6.03077	6.52404	5.9345	5.51208	3.06272	5.62096	6.09629	4.59394	3.41176	3.4744	3.82284	6.11212	low
GSM1020147	5.68438	0	4.71854	4.89506	6.39031	4.33953	4.62393	5.90613	4.83293	3.07609	6.98723	6.48461	5.49671	1.69044	4.48118	5.48648	6.4628	6.50066	4.86493	3.08846	5.88244	5.38412	3.61186	3.40912	3.95926	3.95018	6.10598	low
GSM1020189	4.52877	0	5.00012	4.35584	5.76312	4.19543	3.15702	5.11866	4.7059	2.96627	7.13896	6.7695	5.03439	3.88521	4.83735	5.49389	6.6699	5.27535	6.19721	2.94183	5.75145	6.07559	3.95419	3.32614	3.16198	4.1067	6.09231	low
GSM1049171	0.126027	1	3.1914	3.49218	6.80317	5.24122	3.58364	5.21647	6.19545	2.66161	6.67617	6.80274	5.56463	2.53973	4.51151	5.22154	6.6113	6.15904	4.84054	3.19875	6.01433	5.7078	4.50417	3.37559	3.54261	4.49939	5.97442	low
GSM1049101	0.654795	1	4.22296	4.26776	6.73657	3.439	4.35959	4.8581	5.88055	3.4138	6.25401	6.37606	6.42831	1.7196	4.46593	6.19767	6.6747	6.22607	5.24759	2.91693	5.34372	5.62594	3.15646	3.21323	2.98403	3.8929	5.92399	low
GSM1049086	0.446575	1	3.9174	3.27124	6.41195	3.8527	3.30081	6.37761	5.6291	3.23019	7.56302	7.32319	5.43962	2.36834	4.04078	5.46015	6.40396	6.37995	5.35017	3.50046	5.84579	5.4709	5.68556	3.20277	3.83291	4.50252	5.91049	low
GSM1020148	5.76	0	4.71996	4.1149	5.68462	3.79511	3.75637	5.36759	4.54252	3.20513	6.66051	6.63664	4.72655	1.8654	3.85863	4.35566	6.61449	5.73569	5.52119	2.80076	4.33544	5.7671	3.28918	3.36418	3.76608	4.12794	5.9072	low
GSM1049102	0.80274	0	3.93018	3.49964	6.41195	3.67522	2.77897	5.59809	5.68739	2.44378	6.32863	6.6123	5.21096	2.37552	4.92586	4.44365	6.32159	4.99533	5.21383	3.13686	6.06926	5.77093	3.4981	3.33644	3.66412	3.77495	5.88697	low
GSM1049085	0.926027	1	3.90043	3.04106	6.10565	4.37392	3.06909	6.06791	5.7781	2.77632	7.01789	8.00423	5.58832	2.37723	4.84228	5.39145	6.37877	6.69664	5.48923	3.57693	6.05177	5.14645	5.20616	3.56658	4.31349	4.76416	5.78404	low
GSM1020175	4.86904	0	4.67228	3.45923	7.2498	4.23079	3.87713	5.9928	5.2763	3.32962	7.30948	5.51632	4.10351	1.77971	5.03339	6.07174	5.97328	6.52311	6.06919	3.17189	6.11852	5.44372	4.27083	3.6078	4.0971	4.35376	5.75461	low
GSM1020150	5.60055	0	4.85729	3.98765	4.97271	4.7421	3.14599	5.65735	5.50812	3.4728	7.27684	6.53356	4.69859	1.72737	4.90052	5.47229	6.63413	6.08971	5.53763	2.86961	5.2455	5.93855	4.05444	3.26238	4.23513	4.17684	5.75115	low
GSM1049089	0.619178	1	3.97809	3.74719	5.89684	3.75395	3.59687	4.64638	4.82144	3.41253	6.56825	6.03478	5.10029	1.94185	4.27836	5.34223	6.21232	6.00186	5.41151	2.66029	5.03902	5.54404	3.55923	3.32614	3.03918	4.45527	5.72312	low
GSM1020165	1.57151	1	4.84819	3.53007	5.49031	5.43318	3.60559	6.15063	6.64649	3.5229	7.3602	6.01018	5.63972	2.20162	3.86217	6.06819	5.91418	6.52901	5.01402	2.91882	6.15504	7.12101	4.3568	3.69735	3.34897	4.86724	5.70895	low
GSM1020173	0.810411	1	4.45557	3.85661	5.44917	4.07824	3.13239	5.83543	5.45618	3.51336	5.97065	7.01375	4.5225	4.59307	4.26558	5.04286	6.24916	5.63668	5.47886	2.72392	5.38631	5.77093	4.00812	3.07146	3.14244	4.28582	5.69084	low
GSM1049178	5.33699	0	4.13115	3.69858	4.79939	3.06608	3.49088	5.6302	5.47708	3.15974	6.28694	6.68057	5.3794	2.4555	3.89316	5.46893	6.7851	6.12627	5.23756	2.8642	4.56098	5.46467	3.45061	2.9803	3.77001	4.57537	5.54781	low
GSM1020161	5.20932	0	4.78618	3.74814	5.22462	4.33173	3.48638	6.39703	5.03217	3.45716	7.65299	6.65859	4.91701	1.71341	4.03458	5.09969	6.5853	6.70932	4.86418	3.16268	5.35554	5.59632	3.0826	3.29213	4.0038	3.98963	5.43988	low
GSM1020169	4.88795	0	5.06037	4.16428	6.32234	4.01328	2.85399	5.394	5.05022	3.48432	6.90327	6.95483	5.26156	3.65303	4.67914	4.83168	6.74777	5.29532	6.00038	3.32662	5.55188	6.24855	4.43428	3.66917	4.59144	4.9731	5.37597	low
GSM1020163	4.97671	0	4.66905	4.38815	4.77148	3.95871	2.69402	4.92937	4.59775	2.92049	6.40011	6.86598	4.22891	3.88521	4.60794	4.9144	6.24424	5.05077	5.66808	2.78085	4.71462	5.48685	2.75215	3.14134	3.48642	3.7474	5.22974	low
GSM1020141	5.94082	0	3.96446	4.18492	4.12485	3.76565	3.47427	5.47307	4.02936	3.39426	6.19792	6.2434	4.87262	3.14626	4.16927	5.26196	5.97544	5.71967	5.73278	2.80262	5.08064	5.30099	3.50703	3.25012	3.52942	4.09096	5.22807	low
